# Supplementary material for: Epistatic evidence for gender-dependant slow neurotransmission signalling in substance use disorders: PPP1R12B versus PPP1R1B
Source: PubMed Central journal article supplement (PMC7581882; doi:10.1016/j.ebiom.2020.103066), 2020-10-21
Supplement: mmc1.pdf [file mmc1.pdf]

**c**

|                              | forward primer                 |  | reverse primer                 |  |
|------------------------------|--------------------------------|--|--------------------------------|--|
| <b>Rat <i>Ppp1r12b</i></b>   | 3154 CTTCCTGTCCACCTCACTT 3172  |  | 3294 CCAGACCTGACCTCGTCTA 3276  |  |
|                              |                                |  |                                |  |
| <b>Rat <i>Ppp1r12a</i></b>   | 2890 TAGAAAGAAGAATATCTGA 2908  |  | 3038 TTGTGTGTTTTCTGTCCTA 3020  |  |
| <br>                         |                                |  |                                |  |
| <b>Mouse <i>Ppp1r12b</i></b> | 1535 CCTTAGGGATCGAGGTTCTT 1554 |  | 1709 AACAGCTGACTCTCTGTTCT 1690 |  |
|                              |                                |  |                                |  |
| <b>Mouse <i>Ppp1r12a</i></b> | 1679 GAAGGAGAAAGACACTGCAG 1698 |  | 1865 ACTGAAGACTCTCTGTTCT 1846  |  |

**Supplementary Figure 1. Lack of PPP1R12B antigen homology to PPP1R12A.** (a-b) Anti-C antibody's antigen peptide (corresponding to 71 amino acids of human PPP1R12B) (a) or Anti-N's antigen peptide (corresponding to 386 amino acids of human PPP1R12B) (b) has great identity (94%) to rat PPP1R12B (upper line) but low homolog to rat *Ppp1r12a* (35% identity in C-terminus; 59% identity in N-terminus) (bottle line). Numbers are corresponding amino acid positions in the proteins. (c) cDNA sequence alignments show the lack of primer sequence homology between *Ppp1r12b* and *Ppp1r12a*, for both rat (upper panel, 19-mer) and mouse (low panel, 20-mer). Shown are four *Ppp1r12b* sequences used by this study (also see Table 1): left for forward primer and right, reverse primer; numbers are corresponding base positions in the cDNA.

Males or genders combined

Females only

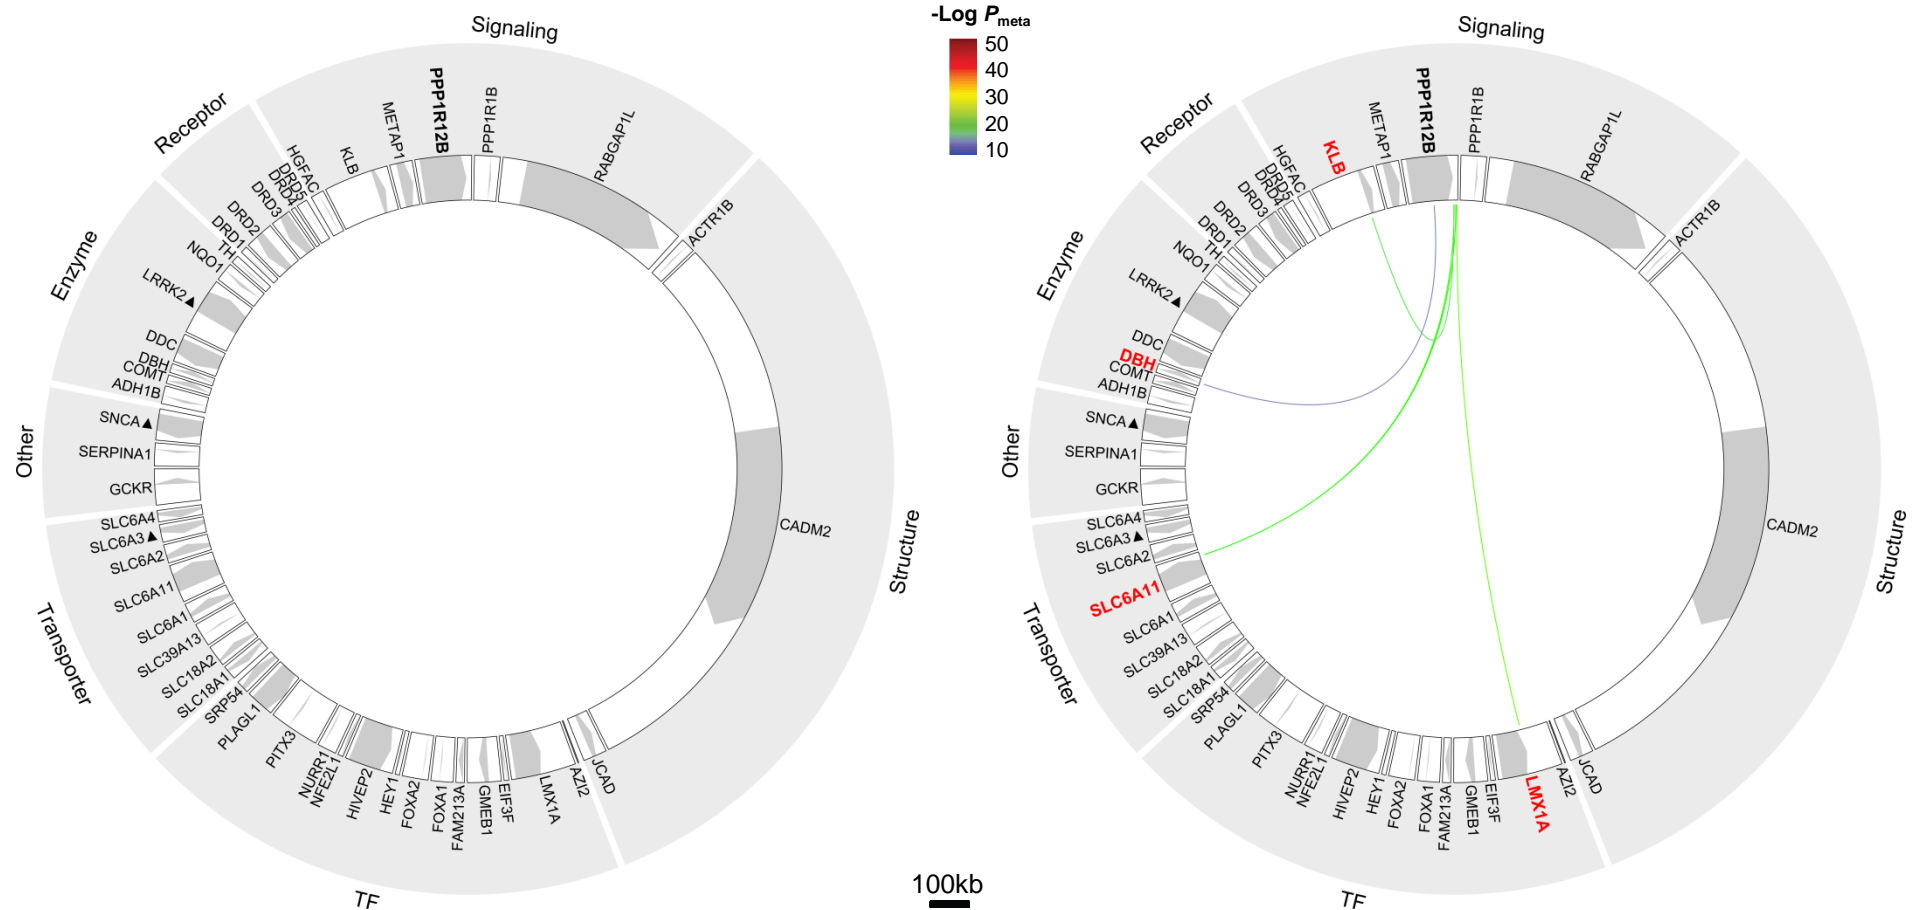

**Supplementary Figure 2. Rare *PPP1R12B* (bold at top) interactions with other genes in PD, for females only (right), based on the 46 gene-network (see Figure 6 and Supplementary Table 1). Black triangle, known risk for PD. Interaction with *LMX1A* reached absolute GW significance after Bonferroni correction, referring to the thermometer bar on the upper middle; scale bar, 100 kb.**

**Supplementary Table 1. 46 genes in the *PPP1R12B* network wheel.**

| Gene name       | System      | order | from <sup>#</sup> | to <sup>#</sup> | Chr | Chr direction  |
|-----------------|-------------|-------|-------------------|-----------------|-----|----------------|
| <i>ADH1B</i>    | Enzyme      | 1     | 100,200,153       | 100,292,187     | 4   | minus strand   |
| <i>COMT</i>     | Enzyme      | 2     | 19,915,326        | 19,959,955      | 22  | forward strand |
| <i>DBH</i>      | Enzyme      | 3     | 136,482,068       | 136,528,721     | 9   | forward strand |
| <i>DDC</i>      | Enzyme      | 4     | 50,508,325        | 50,656,334      | 7   | minus strand   |
| <i>LRRK2</i>    | Enzyme      | 5     | 40,500,195        | 40,799,277      | 12  | forward strand |
| <i>NQO1</i>     | Enzyme      | 6     | 69,700,201        | 69,798,954      | 16  | minus strand   |
| <i>TH</i>       | Enzyme      | 7     | 2,171,601         | 2,213,694       | 11  | minus strand   |
| <i>DRD1</i>     | Receptor    | 8     | 174,860,699       | 174,896,699     | 5   | minus strand   |
| <i>DRD2</i>     | Receptor    | 9     | 113,249,725       | 113,399,491     | 11  | minus strand   |
| <i>DRD3</i>     | Receptor    | 10    | 113,825,192       | 113,931,521     | 3   | minus strand   |
| <i>DRD4</i>     | Receptor    | 11    | 619,671           | 641,191         | 11  | forward strand |
| <i>DRD5</i>     | Receptor    | 12    | 9,752,592         | 9,808,709       | 4   | forward strand |
| <i>HGFAC</i>    | Signaling   | 13    | 3,404,271         | 3,473,450       | 4   | forward strand |
| <i>KLB</i>      | Signaling   | 14    | 39,158,118        | 39,493,248      | 4   | forward strand |
| <i>METAP1</i>   | Signaling   | 15    | 99,883,133        | 99,999,848      | 4   | forward strand |
| <i>PPP1R12B</i> | Signaling   | 16    | 202,293,916       | 202,585,582     | 1   | forward strand |
| <i>PPP1R1B</i>  | Signaling   | 17    | 37,700,199        | 37,832,386      | 17  | forward strand |
| <i>RABGAP1L</i> | Signaling   | 18    | 174,002,465       | 174,997,750     | 1   | forward strand |
| <i>ACTR1B</i>   | Structure   | 19    | 98,242,427        | 98,318,644      | 2   | minus strand   |
| <i>CADM2</i>    | Structure   | 20    | 84,007,790        | 86,992,225      | 3   | forward strand |
| <i>JCAD</i>     | Structure   | 21    | 30,273,174        | 30,396,395      | 10  | minus strand   |
| <i>AZ12</i>     | TF          | 22    | 28,358,334        | 28,363,241      | 3   | minus strand   |
| <i>EIF3F</i>    | TF          | 23    | 7,999,184         | 8,023,737       | 11  | forward strand |
| <i>FAM213A</i>  | TF          | 24    | 82,159,539        | 82,203,534      | 10  | forward strand |
| <i>FOXA1</i>    | TF          | 25    | 37,993,604        | 38,107,646      | 14  | minus strand   |
| <i>FOXA2</i>    | TF          | 26    | 22,534,036        | 22,668,157      | 20  | minus strand   |
| <i>GMEB1</i>    | TF          | 27    | 28,931,625        | 29,106,052      | 1   | forward strand |
| <i>HEY1</i>     | TF          | 28    | 80,660,497        | 80,683,321      | 8   | minus strand   |
| <i>HIVEP2</i>   | TF          | 29    | 143,034,282       | 143,286,922     | 6   | minus strand   |
| <i>LMX1A</i>    | TF          | 30    | 165,014,266       | 165,349,087     | 1   | minus strand   |
| <i>NFE2L1</i>   | TF          | 31    | 46,120,325        | 46,147,807      | 17  | forward strand |
| <i>NURR1</i>    | TF          | 32    | 157,111,093       | 157,210,045     | 2   | minus strand   |
| <i>PITX3</i>    | TF          | 33    | 103,837,118       | 104,098,949     | 10  | minus strand   |
| <i>PLAGL1</i>   | TF          | 34    | 144,261,480       | 144,409,241     | 6   | minus strand   |
| <i>SRP54</i>    | TF          | 35    | 35,434,291        | 35,501,800      | 14  | forward strand |
| <i>SLC18A1</i>  | Transporter | 36    | 19,985,382        | 20,060,856      | 8   | minus strand   |
| <i>SLC18A2</i>  | Transporter | 37    | 118,981,071       | 119,091,767     | 10  | forward strand |
| <i>SLC39A13</i> | Transporter | 38    | 47,374,911        | 47,496,827      | 11  | forward strand |
| <i>SLC6A1</i>   | Transporter | 39    | 11,004,257        | 11,107,643      | 3   | forward strand |
| <i>SLC6A11</i>  | Transporter | 40    | 10,801,929        | 10,999,494      | 3   | forward strand |
| <i>SLC6A2</i>   | Transporter | 41    | 55,670,106        | 55,765,906      | 16  | forward strand |
| <i>SLC6A3</i>   | Transporter | 42    | 1,370,122         | 1,461,568       | 5   | minus strand   |
| <i>SLC6A4</i>   | Transporter | 43    | 28,515,188        | 28,574,177      | 17  | minus strand   |
| <i>GCKR</i>     | Other       | 44    | 27,611,154        | 27,796,526      | 2   | forward strand |
| <i>SERPINA1</i> | Other       | 45    | 94,770,681        | 94,889,702      | 14  | minus strand   |
| <i>SNCA</i>     | Other       | 46    | 90,624,011        | 90,784,866      | 4   | minus strand   |

<sup>#</sup> indicates the coordinates in chr, and define relative gene size in the wheel.

**Supplementary Table 2. Significant SNP-SNP interactions in SUDs.**

Males: 1-274; Females: 276-2119; see Table S1 for genes with Chr and BP information

| No. | Chr1 | SNP1       | BP        | Chr2 | SNP2        | BP2       | P-value  |
|-----|------|------------|-----------|------|-------------|-----------|----------|
| 1   | 1    | rs35873832 | 202300127 | 3    | rs188286851 | 86980758  | 4.74E-42 |
| 2   | 1    | rs35873832 | 202300127 | 14   | rs1956430   | 38088472  | 9.57E-32 |
| 3   | 1    | rs17438379 | 202356935 | 14   | rs1956430   | 38088472  | 2.02E-31 |
| 4   | 1    | rs3767423  | 202417563 | 14   | rs1956430   | 38088472  | 2.11E-31 |
| 5   | 1    | rs17438212 | 202331510 | 14   | rs1956430   | 38088472  | 2.66E-31 |
| 6   | 1    | rs11583656 | 202370997 | 14   | rs1956430   | 38088472  | 2.66E-31 |
| 7   | 1    | rs4950779  | 202542202 | 3    | rs34584686  | 85345197  | 3.17E-31 |
| 8   | 1    | rs4950778  | 202431464 | 3    | rs34584686  | 85345197  | 9.30E-31 |
| 9   | 1    | rs12404552 | 202566780 | 6    | rs597493    | 143060990 | 3.20E-28 |
| 10  | 1    | rs4950778  | 202431464 | 6    | rs6926546   | 144407790 | 5.53E-28 |
| 11  | 1    | rs3767392  | 202547101 | 9    | rs1611118   | 136504923 | 2.15E-27 |
| 12  | 1    | rs4950779  | 202542202 | 6    | rs6926546   | 144407790 | 2.29E-27 |
| 13  | 1    | rs697459   | 202547922 | 2    | rs6745653   | 98289997  | 3.24E-27 |
| 14  | 1    | rs1046269  | 202559753 | 4    | rs3775434   | 90702781  | 4.88E-27 |
| 15  | 1    | rs17438212 | 202331510 | 3    | rs188286851 | 86980758  | 5.74E-27 |
| 16  | 1    | rs11583656 | 202370997 | 3    | rs188286851 | 86980758  | 5.74E-27 |
| 17  | 1    | rs697459   | 202547922 | 2    | rs73959752  | 98242427  | 5.78E-27 |
| 18  | 1    | rs697459   | 202547922 | 2    | rs79616802  | 98277090  | 5.78E-27 |
| 19  | 1    | rs697459   | 202547922 | 2    | rs11886025  | 98279076  | 5.78E-27 |
| 20  | 1    | rs697459   | 202547922 | 2    | rs11886239  | 98279574  | 5.78E-27 |
| 21  | 1    | rs697459   | 202547922 | 2    | rs73959769  | 98288549  | 5.78E-27 |
| 22  | 1    | rs17438379 | 202356935 | 3    | rs188286851 | 86980758  | 6.21E-27 |
| 23  | 1    | rs4950778  | 202431464 | 6    | rs62427148  | 144400664 | 6.69E-27 |
| 24  | 1    | rs697459   | 202547922 | 2    | rs17022045  | 98261688  | 7.92E-27 |
| 25  | 1    | rs12404552 | 202566780 | 3    | rs11715683  | 85372128  | 1.21E-26 |
| 26  | 1    | rs4950779  | 202542202 | 6    | rs62427148  | 144400664 | 3.03E-26 |
| 27  | 1    | rs1046269  | 202559753 | 4    | rs3822089   | 90704011  | 3.23E-26 |
| 28  | 1    | rs1046269  | 202559753 | 4    | rs3822090   | 90704876  | 3.23E-26 |
| 29  | 1    | rs4950778  | 202431464 | 6    | rs55928616  | 144399821 | 4.02E-26 |
| 30  | 1    | rs4950778  | 202431464 | 6    | rs56282161  | 144398956 | 4.04E-26 |
| 31  | 1    | rs4950778  | 202431464 | 6    | rs62427144  | 144395736 | 4.61E-26 |
| 32  | 1    | rs4950778  | 202431464 | 6    | rs55847642  | 144392105 | 4.64E-26 |
| 33  | 1    | rs1046269  | 202559753 | 4    | rs6822088   | 90764310  | 5.73E-26 |
| 34  | 1    | rs12033091 | 202563966 | 6    | rs79924684  | 144315102 | 7.42E-26 |
| 35  | 1    | rs12033827 | 202564040 | 6    | rs79924684  | 144315102 | 7.42E-26 |
| 36  | 1    | rs12033091 | 202563966 | 6    | rs74748302  | 144315419 | 8.23E-26 |
| 37  | 1    | rs12033827 | 202564040 | 6    | rs74748302  | 144315419 | 8.23E-26 |
| 38  | 1    | rs4950779  | 202542202 | 6    | rs55928616  | 144399821 | 1.56E-25 |
| 39  | 1    | rs4950779  | 202542202 | 6    | rs56282161  | 144398956 | 1.56E-25 |
| 40  | 1    | rs4950779  | 202542202 | 6    | rs62427144  | 144395736 | 1.79E-25 |
| 41  | 1    | rs4950779  | 202542202 | 6    | rs55847642  | 144392105 | 1.80E-25 |
| 42  | 1    | rs585658   | 202573179 | 11   | rs4436578   | 113306765 | 2.17E-25 |
| 43  | 1    | rs585658   | 202573179 | 11   | rs4620755   | 113309619 | 2.74E-25 |
| 44  | 1    | rs4950778  | 202431464 | 6    | rs113618940 | 144403097 | 3.51E-25 |
| 45  | 1    | rs1046269  | 202559753 | 4    | rs3775439   | 90709741  | 5.05E-25 |
| 46  | 1    | rs1046269  | 202559753 | 4    | rs6830166   | 90744993  | 1.15E-24 |
| 47  | 1    | rs4950779  | 202542202 | 6    | rs113618940 | 144403097 | 1.32E-24 |

|    |   |            |           |    |             |           |          |
|----|---|------------|-----------|----|-------------|-----------|----------|
| 48 | 1 | rs35873832 | 202300127 | 16 | rs1566652   | 55731575  | 2.18E-24 |
| 49 | 1 | rs17490864 | 202302232 | 3  | rs1375559   | 85559006  | 2.60E-24 |
| 50 | 1 | rs3767392  | 202547101 | 9  | rs1611119   | 136505127 | 3.71E-24 |
| 51 | 1 | rs17490864 | 202302232 | 3  | rs67174538  | 85532862  | 4.04E-24 |
| 52 | 1 | rs17490864 | 202302232 | 3  | rs7626594   | 85533571  | 4.04E-24 |
| 53 | 1 | rs17490864 | 202302232 | 3  | rs67874563  | 85538693  | 4.04E-24 |
| 54 | 1 | rs697459   | 202547922 | 2  | rs11904110  | 98261802  | 4.60E-24 |
| 55 | 1 | rs3767392  | 202547101 | 9  | rs3739885   | 136509696 | 4.66E-24 |
| 56 | 1 | rs3767392  | 202547101 | 9  | rs3739886   | 136509679 | 4.70E-24 |
| 57 | 1 | rs17490864 | 202302232 | 3  | rs62252504  | 85581770  | 5.26E-24 |
| 58 | 1 | rs17490864 | 202302232 | 3  | rs62250717  | 85521990  | 5.33E-24 |
| 59 | 1 | rs10800842 | 202570776 | 3  | rs11715683  | 85372128  | 5.60E-24 |
| 60 | 1 | rs17490864 | 202302232 | 3  | rs9713905   | 85586748  | 6.66E-24 |
| 61 | 1 | rs17490864 | 202302232 | 3  | rs960986    | 85519305  | 6.72E-24 |
| 62 | 1 | rs3767409  | 202479192 | 4  | rs10018362  | 90703753  | 7.39E-24 |
| 63 | 1 | rs17490864 | 202302232 | 3  | rs66963835  | 85567382  | 7.98E-24 |
| 64 | 1 | rs17490864 | 202302232 | 3  | rs62250759  | 85569026  | 7.98E-24 |
| 65 | 1 | rs17490864 | 202302232 | 3  | rs2167048   | 85570393  | 7.98E-24 |
| 66 | 1 | rs17490864 | 202302232 | 3  | rs7624108   | 85527273  | 8.65E-24 |
| 67 | 1 | rs3767409  | 202479192 | 4  | rs10014396  | 90712629  | 8.90E-24 |
| 68 | 1 | rs35873832 | 202300127 | 3  | rs4435654   | 85682637  | 9.05E-24 |
| 69 | 1 | rs17490864 | 202302232 | 3  | rs68102233  | 85558538  | 9.76E-24 |
| 70 | 1 | rs17490864 | 202302232 | 3  | rs7637879   | 85533359  | 9.95E-24 |
| 71 | 1 | rs17490864 | 202302232 | 3  | rs17022915  | 85577613  | 1.05E-23 |
| 72 | 1 | rs12404552 | 202566780 | 6  | rs197492    | 143061160 | 1.28E-23 |
| 73 | 1 | rs4950778  | 202431464 | 6  | rs112340804 | 144403167 | 1.35E-23 |
| 74 | 1 | rs17490864 | 202302232 | 3  | rs62253963  | 85593642  | 1.37E-23 |
| 75 | 1 | rs17490864 | 202302232 | 3  | rs62250471  | 85612226  | 1.51E-23 |
| 76 | 1 | rs17490864 | 202302232 | 3  | rs62250755  | 85563061  | 1.53E-23 |
| 77 | 1 | rs17490864 | 202302232 | 3  | rs72615725  | 85599378  | 1.54E-23 |
| 78 | 1 | rs17490864 | 202302232 | 3  | rs4426693   | 85599384  | 1.54E-23 |
| 79 | 1 | rs4950778  | 202431464 | 6  | rs59906266  | 144405462 | 1.55E-23 |
| 80 | 1 | rs17490864 | 202302232 | 3  | rs17022886  | 85539308  | 1.60E-23 |
| 81 | 1 | rs17490864 | 202302232 | 3  | rs62252460  | 85569776  | 1.70E-23 |
| 82 | 1 | rs17490864 | 202302232 | 3  | rs4355295   | 85631163  | 1.99E-23 |
| 83 | 1 | rs17490864 | 202302232 | 3  | rs11920184  | 85555237  | 2.08E-23 |
| 84 | 1 | rs17490864 | 202302232 | 3  | rs1972992   | 85631329  | 2.19E-23 |
| 85 | 1 | rs17490864 | 202302232 | 3  | rs58834564  | 85550862  | 2.21E-23 |
| 86 | 1 | rs17490864 | 202302232 | 3  | rs10511084  | 85570561  | 2.24E-23 |
| 87 | 1 | rs17490864 | 202302232 | 3  | rs1449388   | 85577284  | 2.24E-23 |
| 88 | 1 | rs17490864 | 202302232 | 3  | rs1375567   | 85636711  | 2.24E-23 |
| 89 | 1 | rs17490864 | 202302232 | 3  | rs62250504  | 85634758  | 2.41E-23 |
| 90 | 1 | rs17490864 | 202302232 | 3  | rs55677942  | 85639341  | 2.57E-23 |
| 91 | 1 | rs3767423  | 202417563 | 4  | rs11944331  | 90690329  | 2.76E-23 |
| 92 | 1 | rs12033091 | 202563966 | 6  | rs3819812   | 144280799 | 3.38E-23 |
| 93 | 1 | rs12033091 | 202563966 | 6  | rs2328536   | 144281394 | 3.38E-23 |
| 94 | 1 | rs12033827 | 202564040 | 6  | rs3819812   | 144280799 | 3.38E-23 |
| 95 | 1 | rs12033827 | 202564040 | 6  | rs2328536   | 144281394 | 3.38E-23 |
| 96 | 1 | rs17490864 | 202302232 | 3  | rs62250724  | 85545232  | 3.39E-23 |
| 97 | 1 | rs17490864 | 202302232 | 3  | rs12636904  | 85546130  | 3.39E-23 |
| 98 | 1 | rs17490864 | 202302232 | 3  | rs17023016  | 85614074  | 3.39E-23 |
| 99 | 1 | rs17490864 | 202302232 | 3  | rs10511082  | 85615903  | 3.39E-23 |

|     |   |            |           |    |             |           |          |
|-----|---|------------|-----------|----|-------------|-----------|----------|
| 100 | 1 | rs35873832 | 202300127 | 3  | rs10511074  | 85653433  | 3.67E-23 |
| 101 | 1 | rs17490864 | 202302232 | 3  | rs12632140  | 85546745  | 3.72E-23 |
| 102 | 1 | rs3767423  | 202417563 | 4  | rs6818319   | 90642868  | 3.74E-23 |
| 103 | 1 | rs17490864 | 202302232 | 3  | rs73137895  | 85622703  | 3.89E-23 |
| 104 | 1 | rs4950779  | 202542202 | 6  | rs112340804 | 144403167 | 4.43E-23 |
| 105 | 1 | rs12033091 | 202563966 | 6  | rs58195565  | 144280430 | 4.49E-23 |
| 106 | 1 | rs12033827 | 202564040 | 6  | rs58195565  | 144280430 | 4.49E-23 |
| 107 | 1 | rs4950779  | 202542202 | 6  | rs59906266  | 144405462 | 4.65E-23 |
| 108 | 1 | rs3767423  | 202417563 | 4  | rs6826785   | 90682474  | 4.70E-23 |
| 109 | 1 | rs3767423  | 202417563 | 4  | rs3857061   | 90686742  | 4.70E-23 |
| 110 | 1 | rs17490864 | 202302232 | 3  | rs12632674  | 85625019  | 5.11E-23 |
| 111 | 1 | rs17490864 | 202302232 | 3  | rs4508797   | 85634460  | 5.11E-23 |
| 112 | 1 | rs12404552 | 202566780 | 3  | rs9872078   | 85376492  | 5.15E-23 |
| 113 | 1 | rs4950779  | 202542202 | 22 | rs1109436   | 19953882  | 5.48E-23 |
| 114 | 1 | rs12033091 | 202563966 | 6  | rs9321952   | 144279640 | 5.63E-23 |
| 115 | 1 | rs12033827 | 202564040 | 6  | rs9321952   | 144279640 | 5.63E-23 |
| 116 | 1 | rs2174696  | 165283470 | 1  | rs10800842  | 202570776 | 5.65E-23 |
| 117 | 1 | rs12404552 | 202566780 | 3  | rs9831374   | 85370873  | 5.95E-23 |
| 118 | 1 | rs3767423  | 202417563 | 4  | rs7681312   | 90638527  | 7.72E-23 |
| 119 | 1 | rs17490864 | 202302232 | 3  | rs11927145  | 85602225  | 8.13E-23 |
| 120 | 1 | rs12404552 | 202566780 | 3  | rs11719276  | 85371838  | 8.19E-23 |
| 121 | 1 | rs3767423  | 202417563 | 4  | rs7661330   | 90663670  | 9.03E-23 |
| 122 | 1 | rs3767423  | 202417563 | 4  | rs3822086   | 90664794  | 9.03E-23 |
| 123 | 1 | rs3767423  | 202417563 | 4  | rs4088093   | 90671287  | 9.03E-23 |
| 124 | 1 | rs3767423  | 202417563 | 4  | rs3756054   | 90674451  | 9.03E-23 |
| 125 | 1 | rs3767423  | 202417563 | 4  | rs3857059   | 90675238  | 9.03E-23 |
| 126 | 1 | rs12033091 | 202563966 | 6  | rs2268447   | 144278095 | 9.18E-23 |
| 127 | 1 | rs12033827 | 202564040 | 6  | rs2268447   | 144278095 | 9.18E-23 |
| 128 | 1 | rs3767423  | 202417563 | 4  | rs7681815   | 90638614  | 9.97E-23 |
| 129 | 1 | rs3767423  | 202417563 | 4  | rs10516844  | 90639847  | 9.97E-23 |
| 130 | 1 | rs3767423  | 202417563 | 4  | rs61032876  | 90641403  | 9.97E-23 |
| 131 | 1 | rs3767423  | 202417563 | 4  | rs7655792   | 90642025  | 9.97E-23 |
| 132 | 1 | rs3767423  | 202417563 | 4  | rs10003708  | 90643051  | 9.97E-23 |
| 133 | 1 | rs3767423  | 202417563 | 4  | rs11945223  | 90643325  | 9.97E-23 |
| 134 | 1 | rs3767423  | 202417563 | 4  | rs3857051   | 90643697  | 9.97E-23 |
| 135 | 1 | rs3767423  | 202417563 | 4  | rs3857052   | 90643857  | 9.97E-23 |
| 136 | 1 | rs3767423  | 202417563 | 4  | rs7436973   | 90643921  | 9.97E-23 |
| 137 | 1 | rs3767423  | 202417563 | 4  | rs17016071  | 90644281  | 9.97E-23 |
| 138 | 1 | rs3767423  | 202417563 | 4  | rs8180209   | 90644454  | 9.97E-23 |
| 139 | 1 | rs3767423  | 202417563 | 4  | rs8180214   | 90644508  | 9.97E-23 |
| 140 | 1 | rs3767423  | 202417563 | 4  | rs7675290   | 90645003  | 9.97E-23 |
| 141 | 1 | rs3767423  | 202417563 | 4  | rs1045722   | 90645671  | 9.97E-23 |
| 142 | 1 | rs3767423  | 202417563 | 4  | rs3857053   | 90645674  | 9.97E-23 |
| 143 | 1 | rs3767423  | 202417563 | 4  | rs10033209  | 90653704  | 9.97E-23 |
| 144 | 1 | rs3767423  | 202417563 | 4  | rs3775422   | 90654664  | 9.97E-23 |
| 145 | 1 | rs4950779  | 202542202 | 9  | rs2283124   | 136515330 | 1.04E-22 |
| 146 | 1 | rs3767423  | 202417563 | 4  | rs3775423   | 90657491  | 1.07E-22 |
| 147 | 1 | rs17490864 | 202302232 | 3  | rs17022974  | 85597454  | 1.12E-22 |
| 148 | 1 | rs17438379 | 202356935 | 3  | rs4435654   | 85682637  | 1.60E-22 |
| 149 | 1 | rs697459   | 202547922 | 4  | rs11734036  | 90624787  | 1.62E-22 |
| 150 | 1 | rs12404552 | 202566780 | 3  | rs13078384  | 85264266  | 1.66E-22 |
| 151 | 1 | rs3767409  | 202479192 | 16 | rs1566652   | 55731575  | 1.85E-22 |

|     |   |             |           |    |            |           |          |
|-----|---|-------------|-----------|----|------------|-----------|----------|
| 152 | 1 | rs3767423   | 202417563 | 4  | rs11931074 | 90639515  | 1.89E-22 |
| 153 | 1 | rs12033091  | 202563966 | 3  | rs11715683 | 85372128  | 1.91E-22 |
| 154 | 1 | rs12033827  | 202564040 | 3  | rs11715683 | 85372128  | 1.91E-22 |
| 155 | 1 | rs17438212  | 202331510 | 3  | rs4435654  | 85682637  | 2.46E-22 |
| 156 | 1 | rs4950778   | 202431464 | 6  | rs62427139 | 144390067 | 2.58E-22 |
| 157 | 1 | rs12404552  | 202566780 | 3  | rs13062591 | 85315738  | 4.06E-22 |
| 158 | 1 | rs12404552  | 202566780 | 3  | rs13087094 | 85353328  | 4.96E-22 |
| 159 | 1 | rs4950778   | 202431464 | 22 | rs1109436  | 19953882  | 5.70E-22 |
| 160 | 1 | rs17438379  | 202356935 | 3  | rs10511074 | 85653433  | 6.54E-22 |
| 161 | 1 | rs4950778   | 202431464 | 9  | rs2283124  | 136515330 | 6.64E-22 |
| 162 | 1 | rs4950779   | 202542202 | 6  | rs62427139 | 144390067 | 8.19E-22 |
| 163 | 1 | rs17438212  | 202331510 | 3  | rs10511074 | 85653433  | 1.02E-21 |
| 164 | 1 | rs11583656  | 202370997 | 3  | rs10511074 | 85653433  | 1.02E-21 |
| 165 | 1 | rs12033091  | 202563966 | 6  | rs198681   | 143197975 | 3.13E-21 |
| 166 | 1 | rs2741853   | 202405671 | 5  | rs2963260  | 1377021   | 3.97E-21 |
| 167 | 1 | rs2741853   | 202405671 | 5  | rs2937630  | 1376326   | 4.81E-21 |
| 168 | 1 | rs697456    | 202514092 | 5  | rs2963260  | 1377021   | 5.47E-21 |
| 169 | 1 | rs705750    | 202531646 | 5  | rs2963260  | 1377021   | 5.47E-21 |
| 170 | 1 | rs147044345 | 174961477 | 1  | rs17438212 | 202331510 | 5.89E-21 |
| 171 | 1 | rs147044345 | 174961477 | 1  | rs11583656 | 202370997 | 5.89E-21 |
| 172 | 1 | rs147044345 | 174961477 | 1  | rs35873832 | 202300127 | 6.38E-21 |
| 173 | 1 | rs17438212  | 202331510 | 4  | rs11944331 | 90690329  | 6.65E-21 |
| 174 | 1 | rs11583656  | 202370997 | 4  | rs11944331 | 90690329  | 6.65E-21 |
| 175 | 1 | rs17438212  | 202331510 | 4  | rs6826785  | 90682474  | 1.06E-20 |
| 176 | 1 | rs17438212  | 202331510 | 4  | rs3857061  | 90686742  | 1.06E-20 |
| 177 | 1 | rs11583656  | 202370997 | 4  | rs6826785  | 90682474  | 1.06E-20 |
| 178 | 1 | rs11583656  | 202370997 | 4  | rs3857061  | 90686742  | 1.06E-20 |
| 179 | 1 | rs147044345 | 174961477 | 1  | rs17438379 | 202356935 | 1.20E-20 |
| 180 | 1 | rs1046269   | 202559753 | 6  | rs12201410 | 143213127 | 1.36E-20 |
| 181 | 1 | rs17438212  | 202331510 | 4  | rs7681312  | 90638527  | 1.69E-20 |
| 182 | 1 | rs11583656  | 202370997 | 4  | rs7681312  | 90638527  | 1.69E-20 |
| 183 | 1 | rs6427950   | 202472066 | 5  | rs2292023  | 1461389   | 1.76E-20 |
| 184 | 1 | rs17438212  | 202331510 | 4  | rs7661330  | 90663670  | 1.94E-20 |
| 185 | 1 | rs17438212  | 202331510 | 4  | rs3822086  | 90664794  | 1.94E-20 |
| 186 | 1 | rs17438212  | 202331510 | 4  | rs4088093  | 90671287  | 1.94E-20 |
| 187 | 1 | rs17438212  | 202331510 | 4  | rs3756054  | 90674451  | 1.94E-20 |
| 188 | 1 | rs17438212  | 202331510 | 4  | rs3857059  | 90675238  | 1.94E-20 |
| 189 | 1 | rs11583656  | 202370997 | 4  | rs7661330  | 90663670  | 1.94E-20 |
| 190 | 1 | rs11583656  | 202370997 | 4  | rs3822086  | 90664794  | 1.94E-20 |
| 191 | 1 | rs11583656  | 202370997 | 4  | rs4088093  | 90671287  | 1.94E-20 |
| 192 | 1 | rs11583656  | 202370997 | 4  | rs3756054  | 90674451  | 1.94E-20 |
| 193 | 1 | rs11583656  | 202370997 | 4  | rs3857059  | 90675238  | 1.94E-20 |
| 194 | 1 | rs35873832  | 202300127 | 16 | rs5568     | 55730124  | 2.09E-20 |
| 195 | 1 | rs17438212  | 202331510 | 4  | rs7681815  | 90638614  | 2.11E-20 |
| 196 | 1 | rs17438212  | 202331510 | 4  | rs10516844 | 90639847  | 2.11E-20 |
| 197 | 1 | rs17438212  | 202331510 | 4  | rs61032876 | 90641403  | 2.11E-20 |
| 198 | 1 | rs17438212  | 202331510 | 4  | rs7655792  | 90642025  | 2.11E-20 |
| 199 | 1 | rs17438212  | 202331510 | 4  | rs10003708 | 90643051  | 2.11E-20 |
| 200 | 1 | rs17438212  | 202331510 | 4  | rs11945223 | 90643325  | 2.11E-20 |
| 201 | 1 | rs17438212  | 202331510 | 4  | rs3857051  | 90643697  | 2.11E-20 |
| 202 | 1 | rs17438212  | 202331510 | 4  | rs3857052  | 90643857  | 2.11E-20 |
| 203 | 1 | rs17438212  | 202331510 | 4  | rs7436973  | 90643921  | 2.11E-20 |



|     |   |            |           |    |            |           |          |
|-----|---|------------|-----------|----|------------|-----------|----------|
| 204 | 1 | rs17438212 | 202331510 | 4  | rs17016071 | 90644281  | 2.11E-20 |
| 205 | 1 | rs17438212 | 202331510 | 4  | rs8180209  | 90644454  | 2.11E-20 |
| 206 | 1 | rs17438212 | 202331510 | 4  | rs8180214  | 90644508  | 2.11E-20 |
| 207 | 1 | rs17438212 | 202331510 | 4  | rs7675290  | 90645003  | 2.11E-20 |
| 208 | 1 | rs17438212 | 202331510 | 4  | rs1045722  | 90645671  | 2.11E-20 |
| 209 | 1 | rs17438212 | 202331510 | 4  | rs3857053  | 90645674  | 2.11E-20 |
| 210 | 1 | rs17438212 | 202331510 | 4  | rs10033209 | 90653704  | 2.11E-20 |
| 211 | 1 | rs17438212 | 202331510 | 4  | rs3775422  | 90654664  | 2.11E-20 |
| 212 | 1 | rs11583656 | 202370997 | 4  | rs7681815  | 90638614  | 2.11E-20 |
| 213 | 1 | rs11583656 | 202370997 | 4  | rs10516844 | 90639847  | 2.11E-20 |
| 214 | 1 | rs11583656 | 202370997 | 4  | rs61032876 | 90641403  | 2.11E-20 |
| 215 | 1 | rs11583656 | 202370997 | 4  | rs7655792  | 90642025  | 2.11E-20 |
| 216 | 1 | rs11583656 | 202370997 | 4  | rs10003708 | 90643051  | 2.11E-20 |
| 217 | 1 | rs11583656 | 202370997 | 4  | rs11945223 | 90643325  | 2.11E-20 |
| 218 | 1 | rs11583656 | 202370997 | 4  | rs3857051  | 90643697  | 2.11E-20 |
| 219 | 1 | rs11583656 | 202370997 | 4  | rs3857052  | 90643857  | 2.11E-20 |
| 220 | 1 | rs11583656 | 202370997 | 4  | rs7436973  | 90643921  | 2.11E-20 |
| 221 | 1 | rs11583656 | 202370997 | 4  | rs17016071 | 90644281  | 2.11E-20 |
| 222 | 1 | rs11583656 | 202370997 | 4  | rs8180209  | 90644454  | 2.11E-20 |
| 223 | 1 | rs11583656 | 202370997 | 4  | rs8180214  | 90644508  | 2.11E-20 |
| 224 | 1 | rs11583656 | 202370997 | 4  | rs7675290  | 90645003  | 2.11E-20 |
| 225 | 1 | rs11583656 | 202370997 | 4  | rs1045722  | 90645671  | 2.11E-20 |
| 226 | 1 | rs11583656 | 202370997 | 4  | rs3857053  | 90645674  | 2.11E-20 |
| 227 | 1 | rs11583656 | 202370997 | 4  | rs10033209 | 90653704  | 2.11E-20 |
| 228 | 1 | rs11583656 | 202370997 | 4  | rs3775422  | 90654664  | 2.11E-20 |
| 229 | 1 | rs930734   | 202318316 | 5  | rs2292023  | 1461389   | 2.32E-20 |
| 230 | 1 | rs10920392 | 202321123 | 5  | rs2292023  | 1461389   | 2.32E-20 |
| 231 | 1 | rs6658708  | 202322113 | 5  | rs2292023  | 1461389   | 2.32E-20 |
| 232 | 1 | rs2361453  | 202336314 | 5  | rs2292023  | 1461389   | 2.32E-20 |
| 233 | 1 | rs17438212 | 202331510 | 4  | rs3775423  | 90657491  | 2.37E-20 |
| 234 | 1 | rs11583656 | 202370997 | 4  | rs3775423  | 90657491  | 2.37E-20 |
| 235 | 1 | rs697456   | 202514092 | 5  | rs2963259  | 1377172   | 2.54E-20 |
| 236 | 1 | rs705750   | 202531646 | 5  | rs2963259  | 1377172   | 2.54E-20 |
| 237 | 1 | rs12033091 | 202563966 | 6  | rs198654   | 143170004 | 2.83E-20 |
| 238 | 1 | rs12033091 | 202563966 | 6  | rs185588   | 143173998 | 2.83E-20 |
| 239 | 1 | rs697456   | 202514092 | 5  | rs2927670  | 1377075   | 2.87E-20 |
| 240 | 1 | rs705750   | 202531646 | 5  | rs2927670  | 1377075   | 2.87E-20 |
| 241 | 1 | rs697456   | 202514092 | 5  | rs2937630  | 1376326   | 3.24E-20 |
| 242 | 1 | rs705750   | 202531646 | 5  | rs2937630  | 1376326   | 3.24E-20 |
| 243 | 1 | rs17438379 | 202356935 | 4  | rs11944331 | 90690329  | 3.73E-20 |
| 244 | 1 | rs17438212 | 202331510 | 4  | rs11931074 | 90639515  | 3.82E-20 |
| 245 | 1 | rs11583656 | 202370997 | 4  | rs11931074 | 90639515  | 3.82E-20 |
| 246 | 1 | rs17438379 | 202356935 | 4  | rs6826785  | 90682474  | 5.89E-20 |
| 247 | 1 | rs17438379 | 202356935 | 4  | rs3857061  | 90686742  | 5.89E-20 |
| 248 | 1 | rs3767392  | 202547101 | 5  | rs265978   | 174863905 | 2.10E-19 |
| 249 | 1 | rs10465591 | 202308344 | 5  | rs2292023  | 1461389   | 7.19E-19 |
| 250 | 1 | rs3767409  | 202479192 | 4  | rs6830166  | 90744993  | 7.21E-18 |
| 251 | 1 | rs17438212 | 202331510 | 16 | rs1566652  | 55731575  | 8.22E-18 |
| 252 | 1 | rs11583656 | 202370997 | 16 | rs1566652  | 55731575  | 8.22E-18 |
| 253 | 1 | rs17438379 | 202356935 | 16 | rs1566652  | 55731575  | 6.04E-17 |
| 254 | 1 | rs3767409  | 202479192 | 4  | rs3775439  | 90709741  | 6.77E-17 |
| 255 | 1 | rs4950778  | 202431464 | 9  | rs61149283 | 136519258 | 6.91E-17 |

|     |   |            |           |    |             |           |          |
|-----|---|------------|-----------|----|-------------|-----------|----------|
| 256 | 1 | rs3767409  | 202479192 | 4  | rs6822088   | 90764310  | 9.10E-17 |
| 257 | 1 | rs2741849  | 202373394 | 9  | rs6271      | 136522274 | 1.41E-16 |
| 258 | 1 | rs3767392  | 202547101 | 5  | rs835616    | 174863690 | 1.80E-16 |
| 259 | 1 | rs697459   | 202547922 | 2  | rs113537081 | 98302136  | 1.89E-16 |
| 260 | 1 | rs697459   | 202547922 | 2  | rs6543021   | 98318644  | 1.89E-16 |
| 261 | 1 | rs3767409  | 202479192 | 4  | rs3822089   | 90704011  | 2.52E-16 |
| 262 | 1 | rs3767409  | 202479192 | 4  | rs3822090   | 90704876  | 2.52E-16 |
| 263 | 1 | rs4950779  | 202542202 | 9  | rs61149283  | 136519258 | 7.86E-16 |
| 264 | 1 | rs4950778  | 202431464 | 9  | rs59164034  | 136519639 | 8.44E-16 |
| 265 | 1 | rs1046269  | 202559753 | 6  | rs9496470   | 143184472 | 1.64E-15 |
| 266 | 1 | rs697459   | 202547922 | 10 | rs2803804   | 119091401 | 2.14E-15 |
| 267 | 1 | rs35873832 | 202300127 | 16 | rs47958     | 55726462  | 2.96E-15 |
| 268 | 1 | rs12404552 | 202566780 | 6  | rs9399469   | 144318529 | 3.15E-15 |
| 269 | 1 | rs3767392  | 202547101 | 9  | rs1611126   | 136509448 | 3.22E-15 |
| 270 | 1 | rs1046269  | 202559753 | 6  | rs13211716  | 143203528 | 3.88E-15 |
| 271 | 1 | rs4950779  | 202542202 | 9  | rs59164034  | 136519639 | 7.17E-15 |
| 272 | 1 | rs1046269  | 202559753 | 6  | rs9496471   | 143184677 | 1.22E-14 |
| 273 | 1 | rs12033091 | 202563966 | 6  | rs9399469   | 144318529 | 2.83E-14 |
| 274 | 1 | rs12033827 | 202564040 | 6  | rs9399469   | 144318529 | 2.83E-14 |

**Females**

|     |   |             |           |   |             |           |           |
|-----|---|-------------|-----------|---|-------------|-----------|-----------|
| 276 | 1 | rs75461537  | 174869593 | 1 | rs17492329  | 202461103 | 5.794E-41 |
| 277 | 1 | rs77551912  | 174873951 | 1 | rs17492329  | 202461103 | 1.282E-40 |
| 278 | 1 | rs6700434   | 174868328 | 1 | rs17492329  | 202461103 | 3.513E-40 |
| 279 | 1 | rs76881580  | 174855306 | 1 | rs17492329  | 202461103 | 6.279E-40 |
| 280 | 1 | rs3753562   | 174923567 | 1 | rs17492329  | 202461103 | 2.682E-39 |
| 281 | 1 | rs76828045  | 174847442 | 1 | rs17492329  | 202461103 | 4.196E-39 |
| 282 | 1 | rs147728966 | 174848270 | 1 | rs17492329  | 202461103 | 4.196E-39 |
| 283 | 1 | rs80134637  | 174749551 | 1 | rs17492329  | 202461103 | 1.308E-38 |
| 284 | 1 | rs59436654  | 174746513 | 1 | rs17492329  | 202461103 | 1.741E-38 |
| 285 | 1 | rs58762254  | 174780210 | 1 | rs17492329  | 202461103 | 2.547E-38 |
| 286 | 1 | rs61028529  | 174787899 | 1 | rs17492329  | 202461103 | 2.547E-38 |
| 287 | 1 | rs79203634  | 174793526 | 1 | rs17492329  | 202461103 | 2.547E-38 |
| 288 | 1 | rs74524401  | 174795281 | 1 | rs17492329  | 202461103 | 2.547E-38 |
| 289 | 1 | rs57053120  | 174830490 | 1 | rs17492329  | 202461103 | 2.552E-38 |
| 290 | 1 | rs77528209  | 174881910 | 1 | rs17492329  | 202461103 | 2.672E-38 |
| 291 | 1 | rs74649124  | 174760589 | 1 | rs17492329  | 202461103 | 3.422E-38 |
| 292 | 1 | rs79258314  | 174760696 | 1 | rs17492329  | 202461103 | 3.422E-38 |
| 293 | 1 | rs76616345  | 174766778 | 1 | rs17492329  | 202461103 | 1.673E-37 |
| 294 | 1 | rs41498747  | 174914122 | 1 | rs17492329  | 202461103 | 1.494E-36 |
| 295 | 1 | rs80324733  | 174776328 | 1 | rs17492329  | 202461103 | 2.949E-36 |
| 296 | 1 | rs4565668   | 174915927 | 1 | rs17492329  | 202461103 | 4.123E-36 |
| 297 | 1 | rs12137988  | 202317696 | 3 | rs111466137 | 113841877 | 9.946E-31 |
| 298 | 1 | rs141729655 | 174432399 | 1 | rs2292489   | 202536848 | 5.854E-30 |
| 299 | 1 | rs79077452  | 174435344 | 1 | rs2292489   | 202536848 | 5.854E-30 |
| 300 | 1 | rs141729655 | 174432399 | 1 | rs930734    | 202318316 | 9.729E-30 |
| 301 | 1 | rs79077452  | 174435344 | 1 | rs930734    | 202318316 | 9.729E-30 |
| 302 | 1 | rs141729655 | 174432399 | 1 | rs2361453   | 202336314 | 1.084E-29 |
| 303 | 1 | rs79077452  | 174435344 | 1 | rs2361453   | 202336314 | 1.084E-29 |
| 304 | 1 | rs141729655 | 174432399 | 1 | rs6427950   | 202472066 | 1.173E-29 |
| 305 | 1 | rs141729655 | 174432399 | 1 | rs3753908   | 202511295 | 1.173E-29 |
| 306 | 1 | rs141729655 | 174432399 | 1 | rs2249811   | 202531741 | 1.173E-29 |
| 307 | 1 | rs141729655 | 174432399 | 1 | rs925532    | 202533880 | 1.173E-29 |

|     |   |             |           |   |            |           |           |
|-----|---|-------------|-----------|---|------------|-----------|-----------|
| 308 | 1 | rs141729655 | 174432399 | 1 | rs925533   | 202534108 | 1.173E-29 |
| 309 | 1 | rs141729655 | 174432399 | 1 | rs3767397  | 202534389 | 1.173E-29 |
| 310 | 1 | rs141729655 | 174432399 | 1 | rs3767395  | 202536140 | 1.173E-29 |
| 311 | 1 | rs79077452  | 174435344 | 1 | rs6427950  | 202472066 | 1.173E-29 |
| 312 | 1 | rs79077452  | 174435344 | 1 | rs3753908  | 202511295 | 1.173E-29 |
| 313 | 1 | rs79077452  | 174435344 | 1 | rs2249811  | 202531741 | 1.173E-29 |
| 314 | 1 | rs79077452  | 174435344 | 1 | rs925532   | 202533880 | 1.173E-29 |
| 315 | 1 | rs79077452  | 174435344 | 1 | rs925533   | 202534108 | 1.173E-29 |
| 316 | 1 | rs79077452  | 174435344 | 1 | rs3767397  | 202534389 | 1.173E-29 |
| 317 | 1 | rs79077452  | 174435344 | 1 | rs3767395  | 202536140 | 1.173E-29 |
| 318 | 1 | rs10489261  | 174440683 | 1 | rs2292489  | 202536848 | 1.403E-29 |
| 319 | 1 | rs141729655 | 174432399 | 1 | rs1890875  | 202531366 | 1.459E-29 |
| 320 | 1 | rs79077452  | 174435344 | 1 | rs1890875  | 202531366 | 1.459E-29 |
| 321 | 1 | rs141729655 | 174432399 | 1 | rs10800836 | 202410429 | 1.533E-29 |
| 322 | 1 | rs141729655 | 174432399 | 1 | rs3767425  | 202413840 | 1.533E-29 |
| 323 | 1 | rs141729655 | 174432399 | 1 | rs3767421  | 202432160 | 1.533E-29 |
| 324 | 1 | rs79077452  | 174435344 | 1 | rs10800836 | 202410429 | 1.533E-29 |
| 325 | 1 | rs79077452  | 174435344 | 1 | rs3767425  | 202413840 | 1.533E-29 |
| 326 | 1 | rs79077452  | 174435344 | 1 | rs3767421  | 202432160 | 1.533E-29 |
| 327 | 1 | rs141729655 | 174432399 | 1 | rs10920392 | 202321123 | 1.65E-29  |
| 328 | 1 | rs141729655 | 174432399 | 1 | rs6658708  | 202322113 | 1.65E-29  |
| 329 | 1 | rs79077452  | 174435344 | 1 | rs10920392 | 202321123 | 1.65E-29  |
| 330 | 1 | rs79077452  | 174435344 | 1 | rs6658708  | 202322113 | 1.65E-29  |
| 331 | 1 | rs141729655 | 174432399 | 1 | rs10159280 | 202394287 | 2.051E-29 |
| 332 | 1 | rs79077452  | 174435344 | 1 | rs10159280 | 202394287 | 2.051E-29 |
| 333 | 1 | rs10489261  | 174440683 | 1 | rs930734   | 202318316 | 2.326E-29 |
| 334 | 1 | rs10489261  | 174440683 | 1 | rs2361453  | 202336314 | 2.586E-29 |
| 335 | 1 | rs58762254  | 174780210 | 1 | rs2292489  | 202536848 | 2.656E-29 |
| 336 | 1 | rs61028529  | 174787899 | 1 | rs2292489  | 202536848 | 2.656E-29 |
| 337 | 1 | rs79203634  | 174793526 | 1 | rs2292489  | 202536848 | 2.656E-29 |
| 338 | 1 | rs74524401  | 174795281 | 1 | rs2292489  | 202536848 | 2.656E-29 |
| 339 | 1 | rs10489261  | 174440683 | 1 | rs6427950  | 202472066 | 2.8E-29   |
| 340 | 1 | rs10489261  | 174440683 | 1 | rs3753908  | 202511295 | 2.8E-29   |
| 341 | 1 | rs10489261  | 174440683 | 1 | rs2249811  | 202531741 | 2.8E-29   |
| 342 | 1 | rs10489261  | 174440683 | 1 | rs925532   | 202533880 | 2.8E-29   |
| 343 | 1 | rs10489261  | 174440683 | 1 | rs925533   | 202534108 | 2.8E-29   |
| 344 | 1 | rs10489261  | 174440683 | 1 | rs3767397  | 202534389 | 2.8E-29   |
| 345 | 1 | rs10489261  | 174440683 | 1 | rs3767395  | 202536140 | 2.8E-29   |
| 346 | 1 | rs59436654  | 174746513 | 1 | rs2292489  | 202536848 | 3.14E-29  |
| 347 | 1 | rs80134637  | 174749551 | 1 | rs2292489  | 202536848 | 3.302E-29 |
| 348 | 1 | rs10489261  | 174440683 | 1 | rs1890875  | 202531366 | 3.481E-29 |
| 349 | 1 | rs10489261  | 174440683 | 1 | rs10800836 | 202410429 | 3.657E-29 |
| 350 | 1 | rs10489261  | 174440683 | 1 | rs3767425  | 202413840 | 3.657E-29 |
| 351 | 1 | rs10489261  | 174440683 | 1 | rs3767421  | 202432160 | 3.657E-29 |
| 352 | 1 | rs10489261  | 174440683 | 1 | rs10920392 | 202321123 | 3.929E-29 |
| 353 | 1 | rs10489261  | 174440683 | 1 | rs6658708  | 202322113 | 3.929E-29 |
| 354 | 1 | rs57053120  | 174830490 | 1 | rs2292489  | 202536848 | 3.954E-29 |
| 355 | 1 | rs58762254  | 174780210 | 1 | rs930734   | 202318316 | 4.208E-29 |
| 356 | 1 | rs61028529  | 174787899 | 1 | rs930734   | 202318316 | 4.208E-29 |
| 357 | 1 | rs79203634  | 174793526 | 1 | rs930734   | 202318316 | 4.208E-29 |
| 358 | 1 | rs74524401  | 174795281 | 1 | rs930734   | 202318316 | 4.208E-29 |
| 359 | 1 | rs58762254  | 174780210 | 1 | rs2361453  | 202336314 | 4.654E-29 |

|     |   |             |           |   |            |           |           |
|-----|---|-------------|-----------|---|------------|-----------|-----------|
| 360 | 1 | rs61028529  | 174787899 | 1 | rs2361453  | 202336314 | 4.654E-29 |
| 361 | 1 | rs79203634  | 174793526 | 1 | rs2361453  | 202336314 | 4.654E-29 |
| 362 | 1 | rs74524401  | 174795281 | 1 | rs2361453  | 202336314 | 4.654E-29 |
| 363 | 1 | rs10489261  | 174440683 | 1 | rs10159280 | 202394287 | 4.879E-29 |
| 364 | 1 | rs59436654  | 174746513 | 1 | rs930734   | 202318316 | 4.994E-29 |
| 365 | 1 | rs58762254  | 174780210 | 1 | rs6427950  | 202472066 | 5.052E-29 |
| 366 | 1 | rs58762254  | 174780210 | 1 | rs3753908  | 202511295 | 5.052E-29 |
| 367 | 1 | rs58762254  | 174780210 | 1 | rs2249811  | 202531741 | 5.052E-29 |
| 368 | 1 | rs58762254  | 174780210 | 1 | rs925532   | 202533880 | 5.052E-29 |
| 369 | 1 | rs58762254  | 174780210 | 1 | rs925533   | 202534108 | 5.052E-29 |
| 370 | 1 | rs58762254  | 174780210 | 1 | rs3767397  | 202534389 | 5.052E-29 |
| 371 | 1 | rs58762254  | 174780210 | 1 | rs3767395  | 202536140 | 5.052E-29 |
| 372 | 1 | rs61028529  | 174787899 | 1 | rs6427950  | 202472066 | 5.052E-29 |
| 373 | 1 | rs61028529  | 174787899 | 1 | rs3753908  | 202511295 | 5.052E-29 |
| 374 | 1 | rs61028529  | 174787899 | 1 | rs2249811  | 202531741 | 5.052E-29 |
| 375 | 1 | rs61028529  | 174787899 | 1 | rs925532   | 202533880 | 5.052E-29 |
| 376 | 1 | rs61028529  | 174787899 | 1 | rs925533   | 202534108 | 5.052E-29 |
| 377 | 1 | rs61028529  | 174787899 | 1 | rs3767397  | 202534389 | 5.052E-29 |
| 378 | 1 | rs61028529  | 174787899 | 1 | rs3767395  | 202536140 | 5.052E-29 |
| 379 | 1 | rs79203634  | 174793526 | 1 | rs6427950  | 202472066 | 5.052E-29 |
| 380 | 1 | rs79203634  | 174793526 | 1 | rs3753908  | 202511295 | 5.052E-29 |
| 381 | 1 | rs79203634  | 174793526 | 1 | rs2249811  | 202531741 | 5.052E-29 |
| 382 | 1 | rs79203634  | 174793526 | 1 | rs925532   | 202533880 | 5.052E-29 |
| 383 | 1 | rs79203634  | 174793526 | 1 | rs925533   | 202534108 | 5.052E-29 |
| 384 | 1 | rs79203634  | 174793526 | 1 | rs3767397  | 202534389 | 5.052E-29 |
| 385 | 1 | rs79203634  | 174793526 | 1 | rs3767395  | 202536140 | 5.052E-29 |
| 386 | 1 | rs74524401  | 174795281 | 1 | rs6427950  | 202472066 | 5.052E-29 |
| 387 | 1 | rs74524401  | 174795281 | 1 | rs3753908  | 202511295 | 5.052E-29 |
| 388 | 1 | rs74524401  | 174795281 | 1 | rs2249811  | 202531741 | 5.052E-29 |
| 389 | 1 | rs74524401  | 174795281 | 1 | rs925532   | 202533880 | 5.052E-29 |
| 390 | 1 | rs74524401  | 174795281 | 1 | rs925533   | 202534108 | 5.052E-29 |
| 391 | 1 | rs74524401  | 174795281 | 1 | rs3767397  | 202534389 | 5.052E-29 |
| 392 | 1 | rs74524401  | 174795281 | 1 | rs3767395  | 202536140 | 5.052E-29 |
| 393 | 1 | rs80134637  | 174749551 | 1 | rs930734   | 202318316 | 5.239E-29 |
| 394 | 1 | rs141729655 | 174432399 | 1 | rs10465591 | 202308344 | 5.274E-29 |
| 395 | 1 | rs79077452  | 174435344 | 1 | rs10465591 | 202308344 | 5.274E-29 |
| 396 | 1 | rs59436654  | 174746513 | 1 | rs2361453  | 202336314 | 5.504E-29 |
| 397 | 1 | rs80134637  | 174749551 | 1 | rs2361453  | 202336314 | 5.786E-29 |
| 398 | 1 | rs74649124  | 174760589 | 1 | rs2292489  | 202536848 | 5.887E-29 |
| 399 | 1 | rs79258314  | 174760696 | 1 | rs2292489  | 202536848 | 5.887E-29 |
| 400 | 1 | rs59436654  | 174746513 | 1 | rs6427950  | 202472066 | 5.975E-29 |
| 401 | 1 | rs59436654  | 174746513 | 1 | rs3753908  | 202511295 | 5.975E-29 |
| 402 | 1 | rs59436654  | 174746513 | 1 | rs2249811  | 202531741 | 5.975E-29 |
| 403 | 1 | rs59436654  | 174746513 | 1 | rs925532   | 202533880 | 5.975E-29 |
| 404 | 1 | rs59436654  | 174746513 | 1 | rs925533   | 202534108 | 5.975E-29 |
| 405 | 1 | rs59436654  | 174746513 | 1 | rs3767397  | 202534389 | 5.975E-29 |
| 406 | 1 | rs59436654  | 174746513 | 1 | rs3767395  | 202536140 | 5.975E-29 |
| 407 | 1 | rs58762254  | 174780210 | 1 | rs1890875  | 202531366 | 6.179E-29 |
| 408 | 1 | rs61028529  | 174787899 | 1 | rs1890875  | 202531366 | 6.179E-29 |
| 409 | 1 | rs79203634  | 174793526 | 1 | rs1890875  | 202531366 | 6.179E-29 |
| 410 | 1 | rs74524401  | 174795281 | 1 | rs1890875  | 202531366 | 6.179E-29 |
| 411 | 1 | rs57053120  | 174830490 | 1 | rs930734   | 202318316 | 6.253E-29 |

|     |   |            |           |   |            |           |           |
|-----|---|------------|-----------|---|------------|-----------|-----------|
| 412 | 1 | rs80134637 | 174749551 | 1 | rs6427950  | 202472066 | 6.277E-29 |
| 413 | 1 | rs80134637 | 174749551 | 1 | rs3753908  | 202511295 | 6.277E-29 |
| 414 | 1 | rs80134637 | 174749551 | 1 | rs2249811  | 202531741 | 6.277E-29 |
| 415 | 1 | rs80134637 | 174749551 | 1 | rs925532   | 202533880 | 6.277E-29 |
| 416 | 1 | rs80134637 | 174749551 | 1 | rs925533   | 202534108 | 6.277E-29 |
| 417 | 1 | rs80134637 | 174749551 | 1 | rs3767397  | 202534389 | 6.277E-29 |
| 418 | 1 | rs80134637 | 174749551 | 1 | rs3767395  | 202536140 | 6.277E-29 |
| 419 | 1 | rs58762254 | 174780210 | 1 | rs10800836 | 202410429 | 6.458E-29 |
| 420 | 1 | rs58762254 | 174780210 | 1 | rs3767425  | 202413840 | 6.458E-29 |
| 421 | 1 | rs58762254 | 174780210 | 1 | rs3767421  | 202432160 | 6.458E-29 |
| 422 | 1 | rs61028529 | 174787899 | 1 | rs10800836 | 202410429 | 6.458E-29 |
| 423 | 1 | rs61028529 | 174787899 | 1 | rs3767425  | 202413840 | 6.458E-29 |
| 424 | 1 | rs61028529 | 174787899 | 1 | rs3767421  | 202432160 | 6.458E-29 |
| 425 | 1 | rs79203634 | 174793526 | 1 | rs10800836 | 202410429 | 6.458E-29 |
| 426 | 1 | rs79203634 | 174793526 | 1 | rs3767425  | 202413840 | 6.458E-29 |
| 427 | 1 | rs79203634 | 174793526 | 1 | rs3767421  | 202432160 | 6.458E-29 |
| 428 | 1 | rs74524401 | 174795281 | 1 | rs10800836 | 202410429 | 6.458E-29 |
| 429 | 1 | rs74524401 | 174795281 | 1 | rs3767425  | 202413840 | 6.458E-29 |
| 430 | 1 | rs74524401 | 174795281 | 1 | rs3767421  | 202432160 | 6.458E-29 |
| 431 | 1 | rs58762254 | 174780210 | 1 | rs10920392 | 202321123 | 6.879E-29 |
| 432 | 1 | rs58762254 | 174780210 | 1 | rs6658708  | 202322113 | 6.879E-29 |
| 433 | 1 | rs61028529 | 174787899 | 1 | rs10920392 | 202321123 | 6.879E-29 |
| 434 | 1 | rs61028529 | 174787899 | 1 | rs6658708  | 202322113 | 6.879E-29 |
| 435 | 1 | rs79203634 | 174793526 | 1 | rs10920392 | 202321123 | 6.879E-29 |
| 436 | 1 | rs79203634 | 174793526 | 1 | rs6658708  | 202322113 | 6.879E-29 |
| 437 | 1 | rs74524401 | 174795281 | 1 | rs10920392 | 202321123 | 6.879E-29 |
| 438 | 1 | rs74524401 | 174795281 | 1 | rs6658708  | 202322113 | 6.879E-29 |
| 439 | 1 | rs57053120 | 174830490 | 1 | rs2361453  | 202336314 | 6.904E-29 |
| 440 | 1 | rs6692753  | 174737457 | 1 | rs2292489  | 202536848 | 7.275E-29 |
| 441 | 1 | rs59436654 | 174746513 | 1 | rs1890875  | 202531366 | 7.308E-29 |
| 442 | 1 | rs1040010  | 202560412 | 5 | rs265973   | 174860699 | 7.485E-29 |
| 443 | 1 | rs57053120 | 174830490 | 1 | rs6427950  | 202472066 | 7.506E-29 |
| 444 | 1 | rs57053120 | 174830490 | 1 | rs3753908  | 202511295 | 7.506E-29 |
| 445 | 1 | rs57053120 | 174830490 | 1 | rs2249811  | 202531741 | 7.506E-29 |
| 446 | 1 | rs57053120 | 174830490 | 1 | rs925532   | 202533880 | 7.506E-29 |
| 447 | 1 | rs57053120 | 174830490 | 1 | rs925533   | 202534108 | 7.506E-29 |
| 448 | 1 | rs57053120 | 174830490 | 1 | rs3767397  | 202534389 | 7.506E-29 |
| 449 | 1 | rs57053120 | 174830490 | 1 | rs3767395  | 202536140 | 7.506E-29 |
| 450 | 1 | rs59436654 | 174746513 | 1 | rs10800836 | 202410429 | 7.639E-29 |
| 451 | 1 | rs59436654 | 174746513 | 1 | rs3767425  | 202413840 | 7.639E-29 |
| 452 | 1 | rs59436654 | 174746513 | 1 | rs3767421  | 202432160 | 7.64E-29  |
| 453 | 1 | rs80134637 | 174749551 | 1 | rs1890875  | 202531366 | 7.677E-29 |
| 454 | 1 | rs80134637 | 174749551 | 1 | rs10800836 | 202410429 | 8.025E-29 |
| 455 | 1 | rs80134637 | 174749551 | 1 | rs3767425  | 202413840 | 8.025E-29 |
| 456 | 1 | rs80134637 | 174749551 | 1 | rs3767421  | 202432160 | 8.026E-29 |
| 457 | 1 | rs59436654 | 174746513 | 1 | rs10920392 | 202321123 | 8.134E-29 |
| 458 | 1 | rs59436654 | 174746513 | 1 | rs6658708  | 202322113 | 8.134E-29 |
| 459 | 1 | rs58762254 | 174780210 | 1 | rs10159280 | 202394287 | 8.406E-29 |
| 460 | 1 | rs61028529 | 174787899 | 1 | rs10159280 | 202394287 | 8.406E-29 |
| 461 | 1 | rs79203634 | 174793526 | 1 | rs10159280 | 202394287 | 8.406E-29 |
| 462 | 1 | rs74524401 | 174795281 | 1 | rs10159280 | 202394287 | 8.406E-29 |
| 463 | 1 | rs80134637 | 174749551 | 1 | rs10920392 | 202321123 | 8.547E-29 |

|     |   |             |           |   |            |           |           |
|-----|---|-------------|-----------|---|------------|-----------|-----------|
| 464 | 1 | rs80134637  | 174749551 | 1 | rs6658708  | 202322113 | 8.547E-29 |
| 465 | 1 | rs57053120  | 174830490 | 1 | rs1890875  | 202531366 | 9.183E-29 |
| 466 | 1 | rs74649124  | 174760589 | 1 | rs930734   | 202318316 | 9.286E-29 |
| 467 | 1 | rs79258314  | 174760696 | 1 | rs930734   | 202318316 | 9.286E-29 |
| 468 | 1 | rs57053120  | 174830490 | 1 | rs10800836 | 202410429 | 9.583E-29 |
| 469 | 1 | rs57053120  | 174830490 | 1 | rs3767425  | 202413840 | 9.583E-29 |
| 470 | 1 | rs57053120  | 174830490 | 1 | rs3767421  | 202432160 | 9.583E-29 |
| 471 | 1 | rs59436654  | 174746513 | 1 | rs10159280 | 202394287 | 9.942E-29 |
| 472 | 1 | rs57053120  | 174830490 | 1 | rs10920392 | 202321123 | 1.02E-28  |
| 473 | 1 | rs57053120  | 174830490 | 1 | rs6658708  | 202322113 | 1.02E-28  |
| 474 | 1 | rs74649124  | 174760589 | 1 | rs2361453  | 202336314 | 1.026E-28 |
| 475 | 1 | rs79258314  | 174760696 | 1 | rs2361453  | 202336314 | 1.026E-28 |
| 476 | 1 | rs80134637  | 174749551 | 1 | rs10159280 | 202394287 | 1.045E-28 |
| 477 | 1 | rs74649124  | 174760589 | 1 | rs6427950  | 202472066 | 1.12E-28  |
| 478 | 1 | rs74649124  | 174760589 | 1 | rs3753908  | 202511295 | 1.12E-28  |
| 479 | 1 | rs74649124  | 174760589 | 1 | rs2249811  | 202531741 | 1.12E-28  |
| 480 | 1 | rs74649124  | 174760589 | 1 | rs925532   | 202533880 | 1.12E-28  |
| 481 | 1 | rs74649124  | 174760589 | 1 | rs925533   | 202534108 | 1.12E-28  |
| 482 | 1 | rs74649124  | 174760589 | 1 | rs3767397  | 202534389 | 1.12E-28  |
| 483 | 1 | rs74649124  | 174760589 | 1 | rs3767395  | 202536140 | 1.12E-28  |
| 484 | 1 | rs79258314  | 174760696 | 1 | rs6427950  | 202472066 | 1.12E-28  |
| 485 | 1 | rs79258314  | 174760696 | 1 | rs3753908  | 202511295 | 1.12E-28  |
| 486 | 1 | rs79258314  | 174760696 | 1 | rs2249811  | 202531741 | 1.12E-28  |
| 487 | 1 | rs79258314  | 174760696 | 1 | rs925532   | 202533880 | 1.12E-28  |
| 488 | 1 | rs79258314  | 174760696 | 1 | rs925533   | 202534108 | 1.12E-28  |
| 489 | 1 | rs79258314  | 174760696 | 1 | rs3767397  | 202534389 | 1.12E-28  |
| 490 | 1 | rs79258314  | 174760696 | 1 | rs3767395  | 202536140 | 1.12E-28  |
| 491 | 1 | rs6692753   | 174737457 | 1 | rs930734   | 202318316 | 1.187E-28 |
| 492 | 1 | rs57053120  | 174830490 | 1 | rs10159280 | 202394287 | 1.247E-28 |
| 493 | 1 | rs10489261  | 174440683 | 1 | rs10465591 | 202308344 | 1.249E-28 |
| 494 | 1 | rs76828045  | 174847442 | 1 | rs2292489  | 202536848 | 1.261E-28 |
| 495 | 1 | rs147728966 | 174848270 | 1 | rs2292489  | 202536848 | 1.261E-28 |
| 496 | 1 | rs6692753   | 174737457 | 1 | rs2361453  | 202336314 | 1.317E-28 |
| 497 | 1 | rs74649124  | 174760589 | 1 | rs1890875  | 202531366 | 1.368E-28 |
| 498 | 1 | rs79258314  | 174760696 | 1 | rs1890875  | 202531366 | 1.368E-28 |
| 499 | 1 | rs74649124  | 174760589 | 1 | rs10800836 | 202410429 | 1.429E-28 |
| 500 | 1 | rs74649124  | 174760589 | 1 | rs3767425  | 202413840 | 1.429E-28 |
| 501 | 1 | rs74649124  | 174760589 | 1 | rs3767421  | 202432160 | 1.429E-28 |
| 502 | 1 | rs79258314  | 174760696 | 1 | rs10800836 | 202410429 | 1.429E-28 |
| 503 | 1 | rs79258314  | 174760696 | 1 | rs3767425  | 202413840 | 1.429E-28 |
| 504 | 1 | rs79258314  | 174760696 | 1 | rs3767421  | 202432160 | 1.429E-28 |
| 505 | 1 | rs6692753   | 174737457 | 1 | rs6427950  | 202472066 | 1.436E-28 |
| 506 | 1 | rs6692753   | 174737457 | 1 | rs3753908  | 202511295 | 1.436E-28 |
| 507 | 1 | rs6692753   | 174737457 | 1 | rs2249811  | 202531741 | 1.436E-28 |
| 508 | 1 | rs6692753   | 174737457 | 1 | rs925532   | 202533880 | 1.436E-28 |
| 509 | 1 | rs6692753   | 174737457 | 1 | rs925533   | 202534108 | 1.436E-28 |
| 510 | 1 | rs6692753   | 174737457 | 1 | rs3767397  | 202534389 | 1.436E-28 |
| 511 | 1 | rs6692753   | 174737457 | 1 | rs3767395  | 202536140 | 1.436E-28 |
| 512 | 1 | rs4950858   | 202552100 | 5 | rs265973   | 174860699 | 1.456E-28 |
| 513 | 1 | rs74649124  | 174760589 | 1 | rs10920392 | 202321123 | 1.516E-28 |
| 514 | 1 | rs74649124  | 174760589 | 1 | rs6658708  | 202322113 | 1.516E-28 |
| 515 | 1 | rs79258314  | 174760696 | 1 | rs10920392 | 202321123 | 1.516E-28 |

|     |   |             |           |   |            |           |           |
|-----|---|-------------|-----------|---|------------|-----------|-----------|
| 516 | 1 | rs79258314  | 174760696 | 1 | rs6658708  | 202322113 | 1.516E-28 |
| 517 | 1 | rs747640    | 202551071 | 4 | rs6853599  | 3445610   | 1.575E-28 |
| 518 | 1 | rs6692753   | 174737457 | 1 | rs1890875  | 202531366 | 1.774E-28 |
| 519 | 1 | rs74649124  | 174760589 | 1 | rs10159280 | 202394287 | 1.85E-28  |
| 520 | 1 | rs79258314  | 174760696 | 1 | rs10159280 | 202394287 | 1.85E-28  |
| 521 | 1 | rs6692753   | 174737457 | 1 | rs10800836 | 202410429 | 1.861E-28 |
| 522 | 1 | rs6692753   | 174737457 | 1 | rs3767425  | 202413840 | 1.861E-28 |
| 523 | 1 | rs6692753   | 174737457 | 1 | rs3767421  | 202432160 | 1.861E-28 |
| 524 | 1 | rs76828045  | 174847442 | 1 | rs930734   | 202318316 | 1.981E-28 |
| 525 | 1 | rs147728966 | 174848270 | 1 | rs930734   | 202318316 | 1.981E-28 |
| 526 | 1 | rs6692753   | 174737457 | 1 | rs10920392 | 202321123 | 1.987E-28 |
| 527 | 1 | rs6692753   | 174737457 | 1 | rs6658708  | 202322113 | 1.987E-28 |
| 528 | 1 | rs58762254  | 174780210 | 1 | rs10465591 | 202308344 | 2.012E-28 |
| 529 | 1 | rs61028529  | 174787899 | 1 | rs10465591 | 202308344 | 2.012E-28 |
| 530 | 1 | rs79203634  | 174793526 | 1 | rs10465591 | 202308344 | 2.012E-28 |
| 531 | 1 | rs74524401  | 174795281 | 1 | rs10465591 | 202308344 | 2.012E-28 |
| 532 | 1 | rs76828045  | 174847442 | 1 | rs2361453  | 202336314 | 2.192E-28 |
| 533 | 1 | rs147728966 | 174848270 | 1 | rs2361453  | 202336314 | 2.192E-28 |
| 534 | 1 | rs76828045  | 174847442 | 1 | rs6427950  | 202472066 | 2.38E-28  |
| 535 | 1 | rs76828045  | 174847442 | 1 | rs3753908  | 202511295 | 2.38E-28  |
| 536 | 1 | rs76828045  | 174847442 | 1 | rs2249811  | 202531741 | 2.38E-28  |
| 537 | 1 | rs76828045  | 174847442 | 1 | rs925532   | 202533880 | 2.38E-28  |
| 538 | 1 | rs76828045  | 174847442 | 1 | rs925533   | 202534108 | 2.38E-28  |
| 539 | 1 | rs76828045  | 174847442 | 1 | rs3767397  | 202534389 | 2.38E-28  |
| 540 | 1 | rs76828045  | 174847442 | 1 | rs3767395  | 202536140 | 2.38E-28  |
| 541 | 1 | rs147728966 | 174848270 | 1 | rs6427950  | 202472066 | 2.38E-28  |
| 542 | 1 | rs147728966 | 174848270 | 1 | rs3753908  | 202511295 | 2.38E-28  |
| 543 | 1 | rs147728966 | 174848270 | 1 | rs2249811  | 202531741 | 2.38E-28  |
| 544 | 1 | rs147728966 | 174848270 | 1 | rs925532   | 202533880 | 2.38E-28  |
| 545 | 1 | rs147728966 | 174848270 | 1 | rs925533   | 202534108 | 2.38E-28  |
| 546 | 1 | rs147728966 | 174848270 | 1 | rs3767397  | 202534389 | 2.38E-28  |
| 547 | 1 | rs147728966 | 174848270 | 1 | rs3767395  | 202536140 | 2.38E-28  |
| 548 | 1 | rs59436654  | 174746513 | 1 | rs10465591 | 202308344 | 2.381E-28 |
| 549 | 1 | rs6692753   | 174737457 | 1 | rs10159280 | 202394287 | 2.453E-28 |
| 550 | 1 | rs80134637  | 174749551 | 1 | rs10465591 | 202308344 | 2.499E-28 |
| 551 | 1 | rs60885521  | 174591547 | 1 | rs2292489  | 202536848 | 2.652E-28 |
| 552 | 1 | rs76828045  | 174847442 | 1 | rs1890875  | 202531366 | 2.907E-28 |
| 553 | 1 | rs147728966 | 174848270 | 1 | rs1890875  | 202531366 | 2.907E-28 |
| 554 | 1 | rs57053120  | 174830490 | 1 | rs10465591 | 202308344 | 2.975E-28 |
| 555 | 1 | rs76828045  | 174847442 | 1 | rs10800836 | 202410429 | 3.034E-28 |
| 556 | 1 | rs76828045  | 174847442 | 1 | rs3767425  | 202413840 | 3.034E-28 |
| 557 | 1 | rs76828045  | 174847442 | 1 | rs3767421  | 202432160 | 3.034E-28 |
| 558 | 1 | rs147728966 | 174848270 | 1 | rs10800836 | 202410429 | 3.034E-28 |
| 559 | 1 | rs147728966 | 174848270 | 1 | rs3767425  | 202413840 | 3.034E-28 |
| 560 | 1 | rs147728966 | 174848270 | 1 | rs3767421  | 202432160 | 3.034E-28 |
| 561 | 1 | rs76828045  | 174847442 | 1 | rs10920392 | 202321123 | 3.233E-28 |
| 562 | 1 | rs76828045  | 174847442 | 1 | rs6658708  | 202322113 | 3.233E-28 |
| 563 | 1 | rs147728966 | 174848270 | 1 | rs10920392 | 202321123 | 3.233E-28 |
| 564 | 1 | rs147728966 | 174848270 | 1 | rs6658708  | 202322113 | 3.233E-28 |
| 565 | 1 | rs76828045  | 174847442 | 1 | rs10159280 | 202394287 | 3.947E-28 |
| 566 | 1 | rs147728966 | 174848270 | 1 | rs10159280 | 202394287 | 3.947E-28 |
| 567 | 1 | rs60885521  | 174591547 | 1 | rs930734   | 202318316 | 4.31E-28  |

|     |   |             |           |   |            |           |           |
|-----|---|-------------|-----------|---|------------|-----------|-----------|
| 568 | 1 | rs74649124  | 174760589 | 1 | rs10465591 | 202308344 | 4.419E-28 |
| 569 | 1 | rs79258314  | 174760696 | 1 | rs10465591 | 202308344 | 4.419E-28 |
| 570 | 1 | rs60885521  | 174591547 | 1 | rs2361453  | 202336314 | 4.773E-28 |
| 571 | 1 | rs60885521  | 174591547 | 1 | rs6427950  | 202472066 | 5.169E-28 |
| 572 | 1 | rs60885521  | 174591547 | 1 | rs3753908  | 202511295 | 5.169E-28 |
| 573 | 1 | rs60885521  | 174591547 | 1 | rs2249811  | 202531741 | 5.169E-28 |
| 574 | 1 | rs60885521  | 174591547 | 1 | rs925532   | 202533880 | 5.169E-28 |
| 575 | 1 | rs60885521  | 174591547 | 1 | rs925533   | 202534108 | 5.169E-28 |
| 576 | 1 | rs60885521  | 174591547 | 1 | rs3767397  | 202534389 | 5.169E-28 |
| 577 | 1 | rs60885521  | 174591547 | 1 | rs3767395  | 202536140 | 5.169E-28 |
| 578 | 1 | rs60723087  | 174655617 | 1 | rs2292489  | 202536848 | 5.267E-28 |
| 579 | 1 | rs75062924  | 174664341 | 1 | rs2292489  | 202536848 | 5.267E-28 |
| 580 | 1 | rs74739388  | 174666752 | 1 | rs2292489  | 202536848 | 5.267E-28 |
| 581 | 1 | rs74225917  | 174686241 | 1 | rs2292489  | 202536848 | 5.267E-28 |
| 582 | 1 | rs59354288  | 174687003 | 1 | rs2292489  | 202536848 | 5.267E-28 |
| 583 | 1 | rs60665754  | 174687287 | 1 | rs2292489  | 202536848 | 5.267E-28 |
| 584 | 1 | rs76014701  | 174690404 | 1 | rs2292489  | 202536848 | 5.267E-28 |
| 585 | 1 | rs74365829  | 174690558 | 1 | rs2292489  | 202536848 | 5.267E-28 |
| 586 | 1 | rs6692753   | 174737457 | 1 | rs10465591 | 202308344 | 6.166E-28 |
| 587 | 1 | rs78199276  | 174706357 | 1 | rs2292489  | 202536848 | 6.223E-28 |
| 588 | 1 | rs6695956   | 174711947 | 1 | rs2292489  | 202536848 | 6.223E-28 |
| 589 | 1 | rs77727672  | 174718575 | 1 | rs2292489  | 202536848 | 6.223E-28 |
| 590 | 1 | rs79388999  | 174724332 | 1 | rs2292489  | 202536848 | 6.223E-28 |
| 591 | 1 | rs61329817  | 174724485 | 1 | rs2292489  | 202536848 | 6.223E-28 |
| 592 | 1 | rs60885521  | 174591547 | 1 | rs1890875  | 202531366 | 6.375E-28 |
| 593 | 1 | rs60885521  | 174591547 | 1 | rs10800836 | 202410429 | 6.684E-28 |
| 594 | 1 | rs60885521  | 174591547 | 1 | rs3767425  | 202413840 | 6.684E-28 |
| 595 | 1 | rs60885521  | 174591547 | 1 | rs3767421  | 202432160 | 6.684E-28 |
| 596 | 1 | rs60885521  | 174591547 | 1 | rs10920392 | 202321123 | 7.154E-28 |
| 597 | 1 | rs60885521  | 174591547 | 1 | rs6658708  | 202322113 | 7.154E-28 |
| 598 | 1 | rs4950859   | 202552839 | 4 | rs6853599  | 3445610   | 7.424E-28 |
| 599 | 1 | rs76616345  | 174766778 | 1 | rs2292489  | 202536848 | 7.492E-28 |
| 600 | 1 | rs7543502   | 174653701 | 1 | rs2292489  | 202536848 | 7.745E-28 |
| 601 | 1 | rs60723087  | 174655617 | 1 | rs930734   | 202318316 | 8.574E-28 |
| 602 | 1 | rs75062924  | 174664341 | 1 | rs930734   | 202318316 | 8.574E-28 |
| 603 | 1 | rs74739388  | 174666752 | 1 | rs930734   | 202318316 | 8.574E-28 |
| 604 | 1 | rs74225917  | 174686241 | 1 | rs930734   | 202318316 | 8.574E-28 |
| 605 | 1 | rs59354288  | 174687003 | 1 | rs930734   | 202318316 | 8.574E-28 |
| 606 | 1 | rs60665754  | 174687287 | 1 | rs930734   | 202318316 | 8.574E-28 |
| 607 | 1 | rs76014701  | 174690404 | 1 | rs930734   | 202318316 | 8.574E-28 |
| 608 | 1 | rs74365829  | 174690558 | 1 | rs930734   | 202318316 | 8.574E-28 |
| 609 | 1 | rs60885521  | 174591547 | 1 | rs10159280 | 202394287 | 8.814E-28 |
| 610 | 1 | rs80324733  | 174776328 | 1 | rs2292489  | 202536848 | 8.867E-28 |
| 611 | 1 | rs76828045  | 174847442 | 1 | rs10465591 | 202308344 | 9.345E-28 |
| 612 | 1 | rs147728966 | 174848270 | 1 | rs10465591 | 202308344 | 9.345E-28 |
| 613 | 1 | rs60723087  | 174655617 | 1 | rs2361453  | 202336314 | 9.477E-28 |
| 614 | 1 | rs75062924  | 174664341 | 1 | rs2361453  | 202336314 | 9.477E-28 |
| 615 | 1 | rs74739388  | 174666752 | 1 | rs2361453  | 202336314 | 9.477E-28 |
| 616 | 1 | rs74225917  | 174686241 | 1 | rs2361453  | 202336314 | 9.477E-28 |
| 617 | 1 | rs59354288  | 174687003 | 1 | rs2361453  | 202336314 | 9.477E-28 |
| 618 | 1 | rs60665754  | 174687287 | 1 | rs2361453  | 202336314 | 9.477E-28 |
| 619 | 1 | rs76014701  | 174690404 | 1 | rs2361453  | 202336314 | 9.477E-28 |



|     |   |            |           |   |           |           |           |
|-----|---|------------|-----------|---|-----------|-----------|-----------|
| 620 | 1 | rs74365829 | 174690558 | 1 | rs2361453 | 202336314 | 9.477E-28 |
| 621 | 1 | rs78199276 | 174706357 | 1 | rs930734  | 202318316 | 1.011E-27 |
| 622 | 1 | rs6695956  | 174711947 | 1 | rs930734  | 202318316 | 1.011E-27 |
| 623 | 1 | rs77727672 | 174718575 | 1 | rs930734  | 202318316 | 1.011E-27 |
| 624 | 1 | rs79388999 | 174724332 | 1 | rs930734  | 202318316 | 1.011E-27 |
| 625 | 1 | rs61329817 | 174724485 | 1 | rs930734  | 202318316 | 1.011E-27 |
| 626 | 1 | rs60723087 | 174655617 | 1 | rs6427950 | 202472066 | 1.029E-27 |
| 627 | 1 | rs60723087 | 174655617 | 1 | rs3753908 | 202511295 | 1.029E-27 |
| 628 | 1 | rs60723087 | 174655617 | 1 | rs2249811 | 202531741 | 1.029E-27 |
| 629 | 1 | rs60723087 | 174655617 | 1 | rs925532  | 202533880 | 1.029E-27 |
| 630 | 1 | rs60723087 | 174655617 | 1 | rs925533  | 202534108 | 1.029E-27 |
| 631 | 1 | rs60723087 | 174655617 | 1 | rs3767397 | 202534389 | 1.029E-27 |
| 632 | 1 | rs60723087 | 174655617 | 1 | rs3767395 | 202536140 | 1.029E-27 |
| 633 | 1 | rs75062924 | 174664341 | 1 | rs6427950 | 202472066 | 1.029E-27 |
| 634 | 1 | rs75062924 | 174664341 | 1 | rs3753908 | 202511295 | 1.029E-27 |
| 635 | 1 | rs75062924 | 174664341 | 1 | rs2249811 | 202531741 | 1.029E-27 |
| 636 | 1 | rs75062924 | 174664341 | 1 | rs925532  | 202533880 | 1.029E-27 |
| 637 | 1 | rs75062924 | 174664341 | 1 | rs925533  | 202534108 | 1.029E-27 |
| 638 | 1 | rs75062924 | 174664341 | 1 | rs3767397 | 202534389 | 1.029E-27 |
| 639 | 1 | rs75062924 | 174664341 | 1 | rs3767395 | 202536140 | 1.029E-27 |
| 640 | 1 | rs74739388 | 174666752 | 1 | rs6427950 | 202472066 | 1.029E-27 |
| 641 | 1 | rs74739388 | 174666752 | 1 | rs3753908 | 202511295 | 1.029E-27 |
| 642 | 1 | rs74739388 | 174666752 | 1 | rs2249811 | 202531741 | 1.029E-27 |
| 643 | 1 | rs74739388 | 174666752 | 1 | rs925532  | 202533880 | 1.029E-27 |
| 644 | 1 | rs74739388 | 174666752 | 1 | rs925533  | 202534108 | 1.029E-27 |
| 645 | 1 | rs74739388 | 174666752 | 1 | rs3767397 | 202534389 | 1.029E-27 |
| 646 | 1 | rs74739388 | 174666752 | 1 | rs3767395 | 202536140 | 1.029E-27 |
| 647 | 1 | rs74225917 | 174686241 | 1 | rs6427950 | 202472066 | 1.029E-27 |
| 648 | 1 | rs74225917 | 174686241 | 1 | rs3753908 | 202511295 | 1.029E-27 |
| 649 | 1 | rs74225917 | 174686241 | 1 | rs2249811 | 202531741 | 1.029E-27 |
| 650 | 1 | rs74225917 | 174686241 | 1 | rs925532  | 202533880 | 1.029E-27 |
| 651 | 1 | rs74225917 | 174686241 | 1 | rs925533  | 202534108 | 1.029E-27 |
| 652 | 1 | rs74225917 | 174686241 | 1 | rs3767397 | 202534389 | 1.029E-27 |
| 653 | 1 | rs74225917 | 174686241 | 1 | rs3767395 | 202536140 | 1.029E-27 |
| 654 | 1 | rs59354288 | 174687003 | 1 | rs6427950 | 202472066 | 1.029E-27 |
| 655 | 1 | rs59354288 | 174687003 | 1 | rs3753908 | 202511295 | 1.029E-27 |
| 656 | 1 | rs59354288 | 174687003 | 1 | rs2249811 | 202531741 | 1.029E-27 |
| 657 | 1 | rs59354288 | 174687003 | 1 | rs925532  | 202533880 | 1.029E-27 |
| 658 | 1 | rs59354288 | 174687003 | 1 | rs925533  | 202534108 | 1.029E-27 |
| 659 | 1 | rs59354288 | 174687003 | 1 | rs3767397 | 202534389 | 1.029E-27 |
| 660 | 1 | rs59354288 | 174687003 | 1 | rs3767395 | 202536140 | 1.029E-27 |
| 661 | 1 | rs60665754 | 174687287 | 1 | rs6427950 | 202472066 | 1.029E-27 |
| 662 | 1 | rs60665754 | 174687287 | 1 | rs3753908 | 202511295 | 1.029E-27 |
| 663 | 1 | rs60665754 | 174687287 | 1 | rs2249811 | 202531741 | 1.029E-27 |
| 664 | 1 | rs60665754 | 174687287 | 1 | rs925532  | 202533880 | 1.029E-27 |
| 665 | 1 | rs60665754 | 174687287 | 1 | rs925533  | 202534108 | 1.029E-27 |
| 666 | 1 | rs60665754 | 174687287 | 1 | rs3767397 | 202534389 | 1.029E-27 |
| 667 | 1 | rs60665754 | 174687287 | 1 | rs3767395 | 202536140 | 1.029E-27 |
| 668 | 1 | rs76014701 | 174690404 | 1 | rs6427950 | 202472066 | 1.029E-27 |
| 669 | 1 | rs76014701 | 174690404 | 1 | rs3753908 | 202511295 | 1.029E-27 |
| 670 | 1 | rs76014701 | 174690404 | 1 | rs2249811 | 202531741 | 1.029E-27 |
| 671 | 1 | rs76014701 | 174690404 | 1 | rs925532  | 202533880 | 1.029E-27 |

|     |   |             |           |   |           |           |           |
|-----|---|-------------|-----------|---|-----------|-----------|-----------|
| 672 | 1 | rs76014701  | 174690404 | 1 | rs925533  | 202534108 | 1.029E-27 |
| 673 | 1 | rs76014701  | 174690404 | 1 | rs3767397 | 202534389 | 1.029E-27 |
| 674 | 1 | rs76014701  | 174690404 | 1 | rs3767395 | 202536140 | 1.029E-27 |
| 675 | 1 | rs74365829  | 174690558 | 1 | rs6427950 | 202472066 | 1.029E-27 |
| 676 | 1 | rs74365829  | 174690558 | 1 | rs3753908 | 202511295 | 1.029E-27 |
| 677 | 1 | rs74365829  | 174690558 | 1 | rs2249811 | 202531741 | 1.029E-27 |
| 678 | 1 | rs74365829  | 174690558 | 1 | rs925532  | 202533880 | 1.029E-27 |
| 679 | 1 | rs74365829  | 174690558 | 1 | rs925533  | 202534108 | 1.029E-27 |
| 680 | 1 | rs74365829  | 174690558 | 1 | rs3767397 | 202534389 | 1.029E-27 |
| 681 | 1 | rs74365829  | 174690558 | 1 | rs3767395 | 202536140 | 1.029E-27 |
| 682 | 1 | rs56864802  | 174568929 | 1 | rs2292489 | 202536848 | 1.072E-27 |
| 683 | 1 | rs60240702  | 174569231 | 1 | rs2292489 | 202536848 | 1.072E-27 |
| 684 | 1 | rs77531515  | 174572000 | 1 | rs2292489 | 202536848 | 1.072E-27 |
| 685 | 1 | rs77025642  | 174572929 | 1 | rs2292489 | 202536848 | 1.072E-27 |
| 686 | 1 | rs79989938  | 174575187 | 1 | rs2292489 | 202536848 | 1.072E-27 |
| 687 | 1 | rs114289262 | 174587137 | 1 | rs2292489 | 202536848 | 1.073E-27 |
| 688 | 1 | rs78199276  | 174706357 | 1 | rs2361453 | 202336314 | 1.117E-27 |
| 689 | 1 | rs6695956   | 174711947 | 1 | rs2361453 | 202336314 | 1.117E-27 |
| 690 | 1 | rs77727672  | 174718575 | 1 | rs2361453 | 202336314 | 1.117E-27 |
| 691 | 1 | rs79388999  | 174724332 | 1 | rs2361453 | 202336314 | 1.117E-27 |
| 692 | 1 | rs61329817  | 174724485 | 1 | rs2361453 | 202336314 | 1.117E-27 |
| 693 | 1 | rs79763699  | 174729671 | 1 | rs2292489 | 202536848 | 1.137E-27 |
| 694 | 1 | rs139161617 | 174732199 | 1 | rs2292489 | 202536848 | 1.137E-27 |
| 695 | 1 | rs6673649   | 174733562 | 1 | rs2292489 | 202536848 | 1.137E-27 |
| 696 | 1 | rs75912125  | 174740527 | 1 | rs2292489 | 202536848 | 1.137E-27 |
| 697 | 1 | rs76616345  | 174766778 | 1 | rs930734  | 202318316 | 1.184E-27 |
| 698 | 1 | rs78199276  | 174706357 | 1 | rs6427950 | 202472066 | 1.212E-27 |
| 699 | 1 | rs78199276  | 174706357 | 1 | rs3753908 | 202511295 | 1.212E-27 |
| 700 | 1 | rs78199276  | 174706357 | 1 | rs2249811 | 202531741 | 1.212E-27 |
| 701 | 1 | rs78199276  | 174706357 | 1 | rs925532  | 202533880 | 1.212E-27 |
| 702 | 1 | rs78199276  | 174706357 | 1 | rs925533  | 202534108 | 1.212E-27 |
| 703 | 1 | rs78199276  | 174706357 | 1 | rs3767397 | 202534389 | 1.212E-27 |
| 704 | 1 | rs78199276  | 174706357 | 1 | rs3767395 | 202536140 | 1.212E-27 |
| 705 | 1 | rs6695956   | 174711947 | 1 | rs6427950 | 202472066 | 1.212E-27 |
| 706 | 1 | rs6695956   | 174711947 | 1 | rs3753908 | 202511295 | 1.212E-27 |
| 707 | 1 | rs6695956   | 174711947 | 1 | rs2249811 | 202531741 | 1.212E-27 |
| 708 | 1 | rs6695956   | 174711947 | 1 | rs925532  | 202533880 | 1.212E-27 |
| 709 | 1 | rs6695956   | 174711947 | 1 | rs925533  | 202534108 | 1.212E-27 |
| 710 | 1 | rs6695956   | 174711947 | 1 | rs3767397 | 202534389 | 1.212E-27 |
| 711 | 1 | rs6695956   | 174711947 | 1 | rs3767395 | 202536140 | 1.212E-27 |
| 712 | 1 | rs77727672  | 174718575 | 1 | rs6427950 | 202472066 | 1.212E-27 |
| 713 | 1 | rs77727672  | 174718575 | 1 | rs3753908 | 202511295 | 1.212E-27 |
| 714 | 1 | rs77727672  | 174718575 | 1 | rs2249811 | 202531741 | 1.212E-27 |
| 715 | 1 | rs77727672  | 174718575 | 1 | rs925532  | 202533880 | 1.212E-27 |
| 716 | 1 | rs77727672  | 174718575 | 1 | rs925533  | 202534108 | 1.212E-27 |
| 717 | 1 | rs77727672  | 174718575 | 1 | rs3767397 | 202534389 | 1.212E-27 |
| 718 | 1 | rs77727672  | 174718575 | 1 | rs3767395 | 202536140 | 1.212E-27 |
| 719 | 1 | rs79388999  | 174724332 | 1 | rs6427950 | 202472066 | 1.212E-27 |
| 720 | 1 | rs79388999  | 174724332 | 1 | rs3753908 | 202511295 | 1.212E-27 |
| 721 | 1 | rs79388999  | 174724332 | 1 | rs2249811 | 202531741 | 1.212E-27 |
| 722 | 1 | rs79388999  | 174724332 | 1 | rs925532  | 202533880 | 1.212E-27 |
| 723 | 1 | rs79388999  | 174724332 | 1 | rs925533  | 202534108 | 1.212E-27 |

|     |   |             |           |   |            |           |           |
|-----|---|-------------|-----------|---|------------|-----------|-----------|
| 724 | 1 | rs79388999  | 174724332 | 1 | rs3767397  | 202534389 | 1.212E-27 |
| 725 | 1 | rs79388999  | 174724332 | 1 | rs3767395  | 202536140 | 1.212E-27 |
| 726 | 1 | rs61329817  | 174724485 | 1 | rs6427950  | 202472066 | 1.212E-27 |
| 727 | 1 | rs61329817  | 174724485 | 1 | rs3753908  | 202511295 | 1.212E-27 |
| 728 | 1 | rs61329817  | 174724485 | 1 | rs2249811  | 202531741 | 1.212E-27 |
| 729 | 1 | rs61329817  | 174724485 | 1 | rs925532   | 202533880 | 1.212E-27 |
| 730 | 1 | rs61329817  | 174724485 | 1 | rs925533   | 202534108 | 1.212E-27 |
| 731 | 1 | rs61329817  | 174724485 | 1 | rs3767397  | 202534389 | 1.212E-27 |
| 732 | 1 | rs61329817  | 174724485 | 1 | rs3767395  | 202536140 | 1.212E-27 |
| 733 | 1 | rs7543502   | 174653701 | 1 | rs930734   | 202318316 | 1.257E-27 |
| 734 | 1 | rs60723087  | 174655617 | 1 | rs1890875  | 202531366 | 1.268E-27 |
| 735 | 1 | rs75062924  | 174664341 | 1 | rs1890875  | 202531366 | 1.268E-27 |
| 736 | 1 | rs74739388  | 174666752 | 1 | rs1890875  | 202531366 | 1.268E-27 |
| 737 | 1 | rs74225917  | 174686241 | 1 | rs1890875  | 202531366 | 1.268E-27 |
| 738 | 1 | rs59354288  | 174687003 | 1 | rs1890875  | 202531366 | 1.268E-27 |
| 739 | 1 | rs60665754  | 174687287 | 1 | rs1890875  | 202531366 | 1.268E-27 |
| 740 | 1 | rs76014701  | 174690404 | 1 | rs1890875  | 202531366 | 1.268E-27 |
| 741 | 1 | rs74365829  | 174690558 | 1 | rs1890875  | 202531366 | 1.268E-27 |
| 742 | 1 | rs76616345  | 174766778 | 1 | rs2361453  | 202336314 | 1.287E-27 |
| 743 | 1 | rs60723087  | 174655617 | 1 | rs10800836 | 202410429 | 1.33E-27  |
| 744 | 1 | rs60723087  | 174655617 | 1 | rs3767425  | 202413840 | 1.33E-27  |
| 745 | 1 | rs60723087  | 174655617 | 1 | rs3767421  | 202432160 | 1.33E-27  |
| 746 | 1 | rs75062924  | 174664341 | 1 | rs10800836 | 202410429 | 1.33E-27  |
| 747 | 1 | rs75062924  | 174664341 | 1 | rs3767425  | 202413840 | 1.33E-27  |
| 748 | 1 | rs75062924  | 174664341 | 1 | rs3767421  | 202432160 | 1.33E-27  |
| 749 | 1 | rs74739388  | 174666752 | 1 | rs10800836 | 202410429 | 1.33E-27  |
| 750 | 1 | rs74739388  | 174666752 | 1 | rs3767425  | 202413840 | 1.33E-27  |
| 751 | 1 | rs74739388  | 174666752 | 1 | rs3767421  | 202432160 | 1.33E-27  |
| 752 | 1 | rs74225917  | 174686241 | 1 | rs10800836 | 202410429 | 1.33E-27  |
| 753 | 1 | rs74225917  | 174686241 | 1 | rs3767425  | 202413840 | 1.33E-27  |
| 754 | 1 | rs74225917  | 174686241 | 1 | rs3767421  | 202432160 | 1.33E-27  |
| 755 | 1 | rs59354288  | 174687003 | 1 | rs10800836 | 202410429 | 1.33E-27  |
| 756 | 1 | rs59354288  | 174687003 | 1 | rs3767425  | 202413840 | 1.33E-27  |
| 757 | 1 | rs59354288  | 174687003 | 1 | rs3767421  | 202432160 | 1.33E-27  |
| 758 | 1 | rs60665754  | 174687287 | 1 | rs10800836 | 202410429 | 1.33E-27  |
| 759 | 1 | rs60665754  | 174687287 | 1 | rs3767425  | 202413840 | 1.33E-27  |
| 760 | 1 | rs60665754  | 174687287 | 1 | rs3767421  | 202432160 | 1.33E-27  |
| 761 | 1 | rs76014701  | 174690404 | 1 | rs10800836 | 202410429 | 1.33E-27  |
| 762 | 1 | rs76014701  | 174690404 | 1 | rs3767425  | 202413840 | 1.33E-27  |
| 763 | 1 | rs76014701  | 174690404 | 1 | rs3767421  | 202432160 | 1.33E-27  |
| 764 | 1 | rs74365829  | 174690558 | 1 | rs10800836 | 202410429 | 1.33E-27  |
| 765 | 1 | rs74365829  | 174690558 | 1 | rs3767425  | 202413840 | 1.33E-27  |
| 766 | 1 | rs74365829  | 174690558 | 1 | rs3767421  | 202432160 | 1.33E-27  |
| 767 | 1 | rs138190123 | 174555301 | 1 | rs2292489  | 202536848 | 1.341E-27 |
| 768 | 1 | rs80324733  | 174776328 | 1 | rs930734   | 202318316 | 1.381E-27 |
| 769 | 1 | rs7543502   | 174653701 | 1 | rs2361453  | 202336314 | 1.388E-27 |
| 770 | 1 | rs60723087  | 174655617 | 1 | rs10920392 | 202321123 | 1.42E-27  |
| 771 | 1 | rs60723087  | 174655617 | 1 | rs6658708  | 202322113 | 1.42E-27  |
| 772 | 1 | rs75062924  | 174664341 | 1 | rs10920392 | 202321123 | 1.42E-27  |
| 773 | 1 | rs75062924  | 174664341 | 1 | rs6658708  | 202322113 | 1.42E-27  |
| 774 | 1 | rs74739388  | 174666752 | 1 | rs10920392 | 202321123 | 1.42E-27  |
| 775 | 1 | rs74739388  | 174666752 | 1 | rs6658708  | 202322113 | 1.42E-27  |

|     |   |            |           |   |            |           |           |
|-----|---|------------|-----------|---|------------|-----------|-----------|
| 776 | 1 | rs74225917 | 174686241 | 1 | rs10920392 | 202321123 | 1.42E-27  |
| 777 | 1 | rs74225917 | 174686241 | 1 | rs6658708  | 202322113 | 1.42E-27  |
| 778 | 1 | rs59354288 | 174687003 | 1 | rs10920392 | 202321123 | 1.42E-27  |
| 779 | 1 | rs59354288 | 174687003 | 1 | rs6658708  | 202322113 | 1.42E-27  |
| 780 | 1 | rs60665754 | 174687287 | 1 | rs10920392 | 202321123 | 1.42E-27  |
| 781 | 1 | rs60665754 | 174687287 | 1 | rs6658708  | 202322113 | 1.42E-27  |
| 782 | 1 | rs76014701 | 174690404 | 1 | rs10920392 | 202321123 | 1.42E-27  |
| 783 | 1 | rs76014701 | 174690404 | 1 | rs6658708  | 202322113 | 1.42E-27  |
| 784 | 1 | rs74365829 | 174690558 | 1 | rs10920392 | 202321123 | 1.42E-27  |
| 785 | 1 | rs74365829 | 174690558 | 1 | rs6658708  | 202322113 | 1.42E-27  |
| 786 | 1 | rs76616345 | 174766778 | 1 | rs6427950  | 202472066 | 1.448E-27 |
| 787 | 1 | rs76616345 | 174766778 | 1 | rs3753908  | 202511295 | 1.448E-27 |
| 788 | 1 | rs76616345 | 174766778 | 1 | rs2249811  | 202531741 | 1.448E-27 |
| 789 | 1 | rs76616345 | 174766778 | 1 | rs925532   | 202533880 | 1.448E-27 |
| 790 | 1 | rs76616345 | 174766778 | 1 | rs925533   | 202534108 | 1.448E-27 |
| 791 | 1 | rs76616345 | 174766778 | 1 | rs3767397  | 202534389 | 1.448E-27 |
| 792 | 1 | rs76616345 | 174766778 | 1 | rs3767395  | 202536140 | 1.448E-27 |
| 793 | 1 | rs78199276 | 174706357 | 1 | rs1890875  | 202531366 | 1.491E-27 |
| 794 | 1 | rs6695956  | 174711947 | 1 | rs1890875  | 202531366 | 1.491E-27 |
| 795 | 1 | rs77727672 | 174718575 | 1 | rs1890875  | 202531366 | 1.491E-27 |
| 796 | 1 | rs79388999 | 174724332 | 1 | rs1890875  | 202531366 | 1.491E-27 |
| 797 | 1 | rs61329817 | 174724485 | 1 | rs1890875  | 202531366 | 1.491E-27 |
| 798 | 1 | rs7543502  | 174653701 | 1 | rs6427950  | 202472066 | 1.511E-27 |
| 799 | 1 | rs7543502  | 174653701 | 1 | rs3753908  | 202511295 | 1.511E-27 |
| 800 | 1 | rs7543502  | 174653701 | 1 | rs2249811  | 202531741 | 1.511E-27 |
| 801 | 1 | rs7543502  | 174653701 | 1 | rs925532   | 202533880 | 1.511E-27 |
| 802 | 1 | rs7543502  | 174653701 | 1 | rs925533   | 202534108 | 1.511E-27 |
| 803 | 1 | rs7543502  | 174653701 | 1 | rs3767397  | 202534389 | 1.511E-27 |
| 804 | 1 | rs7543502  | 174653701 | 1 | rs3767395  | 202536140 | 1.511E-27 |
| 805 | 1 | rs80324733 | 174776328 | 1 | rs2361453  | 202336314 | 1.516E-27 |
| 806 | 1 | rs78199276 | 174706357 | 1 | rs10800836 | 202410429 | 1.564E-27 |
| 807 | 1 | rs78199276 | 174706357 | 1 | rs3767425  | 202413840 | 1.564E-27 |
| 808 | 1 | rs78199276 | 174706357 | 1 | rs3767421  | 202432160 | 1.564E-27 |
| 809 | 1 | rs6695956  | 174711947 | 1 | rs10800836 | 202410429 | 1.564E-27 |
| 810 | 1 | rs6695956  | 174711947 | 1 | rs3767425  | 202413840 | 1.564E-27 |
| 811 | 1 | rs6695956  | 174711947 | 1 | rs3767421  | 202432160 | 1.564E-27 |
| 812 | 1 | rs77727672 | 174718575 | 1 | rs10800836 | 202410429 | 1.564E-27 |
| 813 | 1 | rs77727672 | 174718575 | 1 | rs3767425  | 202413840 | 1.564E-27 |
| 814 | 1 | rs77727672 | 174718575 | 1 | rs3767421  | 202432160 | 1.564E-27 |
| 815 | 1 | rs79388999 | 174724332 | 1 | rs10800836 | 202410429 | 1.564E-27 |
| 816 | 1 | rs79388999 | 174724332 | 1 | rs3767425  | 202413840 | 1.564E-27 |
| 817 | 1 | rs79388999 | 174724332 | 1 | rs3767421  | 202432160 | 1.564E-27 |
| 818 | 1 | rs61329817 | 174724485 | 1 | rs10800836 | 202410429 | 1.564E-27 |
| 819 | 1 | rs61329817 | 174724485 | 1 | rs3767425  | 202413840 | 1.564E-27 |
| 820 | 1 | rs61329817 | 174724485 | 1 | rs3767421  | 202432160 | 1.564E-27 |
| 821 | 1 | rs80324733 | 174776328 | 1 | rs6427950  | 202472066 | 1.649E-27 |
| 822 | 1 | rs80324733 | 174776328 | 1 | rs3753908  | 202511295 | 1.649E-27 |
| 823 | 1 | rs80324733 | 174776328 | 1 | rs2249811  | 202531741 | 1.649E-27 |
| 824 | 1 | rs80324733 | 174776328 | 1 | rs925532   | 202533880 | 1.649E-27 |
| 825 | 1 | rs80324733 | 174776328 | 1 | rs925533   | 202534108 | 1.649E-27 |
| 826 | 1 | rs80324733 | 174776328 | 1 | rs3767397  | 202534389 | 1.649E-27 |
| 827 | 1 | rs80324733 | 174776328 | 1 | rs3767395  | 202536140 | 1.649E-27 |

|     |   |             |           |   |            |           |           |
|-----|---|-------------|-----------|---|------------|-----------|-----------|
| 828 | 1 | rs78199276  | 174706357 | 1 | rs10920392 | 202321123 | 1.671E-27 |
| 829 | 1 | rs78199276  | 174706357 | 1 | rs6658708  | 202322113 | 1.671E-27 |
| 830 | 1 | rs6695956   | 174711947 | 1 | rs10920392 | 202321123 | 1.671E-27 |
| 831 | 1 | rs6695956   | 174711947 | 1 | rs6658708  | 202322113 | 1.671E-27 |
| 832 | 1 | rs77727672  | 174718575 | 1 | rs10920392 | 202321123 | 1.671E-27 |
| 833 | 1 | rs77727672  | 174718575 | 1 | rs6658708  | 202322113 | 1.671E-27 |
| 834 | 1 | rs79388999  | 174724332 | 1 | rs10920392 | 202321123 | 1.671E-27 |
| 835 | 1 | rs79388999  | 174724332 | 1 | rs6658708  | 202322113 | 1.671E-27 |
| 836 | 1 | rs61329817  | 174724485 | 1 | rs10920392 | 202321123 | 1.671E-27 |
| 837 | 1 | rs61329817  | 174724485 | 1 | rs6658708  | 202322113 | 1.671E-27 |
| 838 | 1 | rs59190079  | 174594608 | 1 | rs2292489  | 202536848 | 1.702E-27 |
| 839 | 1 | rs56864802  | 174568929 | 1 | rs930734   | 202318316 | 1.737E-27 |
| 840 | 1 | rs60240702  | 174569231 | 1 | rs930734   | 202318316 | 1.737E-27 |
| 841 | 1 | rs77531515  | 174572000 | 1 | rs930734   | 202318316 | 1.737E-27 |
| 842 | 1 | rs77025642  | 174572929 | 1 | rs930734   | 202318316 | 1.737E-27 |
| 843 | 1 | rs79989938  | 174575187 | 1 | rs930734   | 202318316 | 1.737E-27 |
| 844 | 1 | rs114289262 | 174587137 | 1 | rs930734   | 202318316 | 1.741E-27 |
| 845 | 1 | rs60723087  | 174655617 | 1 | rs10159280 | 202394287 | 1.749E-27 |
| 846 | 1 | rs75062924  | 174664341 | 1 | rs10159280 | 202394287 | 1.749E-27 |
| 847 | 1 | rs74739388  | 174666752 | 1 | rs10159280 | 202394287 | 1.749E-27 |
| 848 | 1 | rs74225917  | 174686241 | 1 | rs10159280 | 202394287 | 1.749E-27 |
| 849 | 1 | rs59354288  | 174687003 | 1 | rs10159280 | 202394287 | 1.749E-27 |
| 850 | 1 | rs60665754  | 174687287 | 1 | rs10159280 | 202394287 | 1.749E-27 |
| 851 | 1 | rs76014701  | 174690404 | 1 | rs10159280 | 202394287 | 1.749E-27 |
| 852 | 1 | rs74365829  | 174690558 | 1 | rs10159280 | 202394287 | 1.749E-27 |
| 853 | 1 | rs60723087  | 174655617 | 1 | rs705742   | 202461982 | 1.771E-27 |
| 854 | 1 | rs75062924  | 174664341 | 1 | rs705742   | 202461982 | 1.771E-27 |
| 855 | 1 | rs74739388  | 174666752 | 1 | rs705742   | 202461982 | 1.771E-27 |
| 856 | 1 | rs74225917  | 174686241 | 1 | rs705742   | 202461982 | 1.771E-27 |
| 857 | 1 | rs59354288  | 174687003 | 1 | rs705742   | 202461982 | 1.771E-27 |
| 858 | 1 | rs60665754  | 174687287 | 1 | rs705742   | 202461982 | 1.771E-27 |
| 859 | 1 | rs76014701  | 174690404 | 1 | rs705742   | 202461982 | 1.771E-27 |
| 860 | 1 | rs74365829  | 174690558 | 1 | rs705742   | 202461982 | 1.771E-27 |
| 861 | 1 | rs76616345  | 174766778 | 1 | rs1890875  | 202531366 | 1.777E-27 |
| 862 | 1 | rs16847018  | 174419672 | 1 | rs2292489  | 202536848 | 1.821E-27 |
| 863 | 1 | rs16847025  | 174425858 | 1 | rs2292489  | 202536848 | 1.821E-27 |
| 864 | 1 | rs75368101  | 174447029 | 1 | rs2292489  | 202536848 | 1.821E-27 |
| 865 | 1 | rs74367921  | 174457505 | 1 | rs2292489  | 202536848 | 1.821E-27 |
| 866 | 1 | rs141587031 | 174458302 | 1 | rs2292489  | 202536848 | 1.821E-27 |
| 867 | 1 | rs75222047  | 174460751 | 1 | rs2292489  | 202536848 | 1.821E-27 |
| 868 | 1 | rs77684114  | 174461386 | 1 | rs2292489  | 202536848 | 1.821E-27 |
| 869 | 1 | rs79170014  | 174462952 | 1 | rs2292489  | 202536848 | 1.821E-27 |
| 870 | 1 | rs2901819   | 174467697 | 1 | rs2292489  | 202536848 | 1.821E-27 |
| 871 | 1 | rs58063264  | 174468442 | 1 | rs2292489  | 202536848 | 1.821E-27 |
| 872 | 1 | rs41397546  | 174476714 | 1 | rs2292489  | 202536848 | 1.821E-27 |
| 873 | 1 | rs16847121  | 174482433 | 1 | rs2292489  | 202536848 | 1.821E-27 |
| 874 | 1 | rs76886469  | 174488738 | 1 | rs2292489  | 202536848 | 1.821E-27 |
| 875 | 1 | rs57132183  | 174492721 | 1 | rs2292489  | 202536848 | 1.821E-27 |
| 876 | 1 | rs74651209  | 174501445 | 1 | rs2292489  | 202536848 | 1.821E-27 |
| 877 | 1 | rs59262554  | 174504233 | 1 | rs2292489  | 202536848 | 1.821E-27 |
| 878 | 1 | rs7547843   | 174507529 | 1 | rs2292489  | 202536848 | 1.821E-27 |
| 879 | 1 | rs142531097 | 174512268 | 1 | rs2292489  | 202536848 | 1.821E-27 |

|     |   |             |           |   |            |           |           |
|-----|---|-------------|-----------|---|------------|-----------|-----------|
| 880 | 1 | rs146786952 | 174514535 | 1 | rs2292489  | 202536848 | 1.821E-27 |
| 881 | 1 | rs41266052  | 174517443 | 1 | rs2292489  | 202536848 | 1.821E-27 |
| 882 | 1 | rs57898822  | 174531784 | 1 | rs2292489  | 202536848 | 1.821E-27 |
| 883 | 1 | rs75120198  | 174535022 | 1 | rs2292489  | 202536848 | 1.821E-27 |
| 884 | 1 | rs75134210  | 174536483 | 1 | rs2292489  | 202536848 | 1.821E-27 |
| 885 | 1 | rs2179109   | 174540259 | 1 | rs2292489  | 202536848 | 1.821E-27 |
| 886 | 1 | rs16847206  | 174541307 | 1 | rs2292489  | 202536848 | 1.821E-27 |
| 887 | 1 | rs148694367 | 174544318 | 1 | rs2292489  | 202536848 | 1.821E-27 |
| 888 | 1 | rs143179310 | 174545451 | 1 | rs2292489  | 202536848 | 1.821E-27 |
| 889 | 1 | rs79763699  | 174729671 | 1 | rs930734   | 202318316 | 1.828E-27 |
| 890 | 1 | rs139161617 | 174732199 | 1 | rs930734   | 202318316 | 1.828E-27 |
| 891 | 1 | rs6673649   | 174733562 | 1 | rs930734   | 202318316 | 1.828E-27 |
| 892 | 1 | rs75912125  | 174740527 | 1 | rs930734   | 202318316 | 1.828E-27 |
| 893 | 1 | rs76616345  | 174766778 | 1 | rs10800836 | 202410429 | 1.85E-27  |
| 894 | 1 | rs76616345  | 174766778 | 1 | rs3767425  | 202413840 | 1.85E-27  |
| 895 | 1 | rs76616345  | 174766778 | 1 | rs3767421  | 202432160 | 1.85E-27  |
| 896 | 1 | rs7543502   | 174653701 | 1 | rs1890875  | 202531366 | 1.863E-27 |
| 897 | 1 | rs56864802  | 174568929 | 1 | rs2361453  | 202336314 | 1.92E-27  |
| 898 | 1 | rs60240702  | 174569231 | 1 | rs2361453  | 202336314 | 1.92E-27  |
| 899 | 1 | rs77531515  | 174572000 | 1 | rs2361453  | 202336314 | 1.92E-27  |
| 900 | 1 | rs77025642  | 174572929 | 1 | rs2361453  | 202336314 | 1.92E-27  |
| 901 | 1 | rs79989938  | 174575187 | 1 | rs2361453  | 202336314 | 1.92E-27  |
| 902 | 1 | rs114289262 | 174587137 | 1 | rs2361453  | 202336314 | 1.928E-27 |
| 903 | 1 | rs76616345  | 174766778 | 1 | rs10920392 | 202321123 | 1.929E-27 |
| 904 | 1 | rs76616345  | 174766778 | 1 | rs6658708  | 202322113 | 1.929E-27 |
| 905 | 1 | rs7543502   | 174653701 | 1 | rs10800836 | 202410429 | 1.951E-27 |
| 906 | 1 | rs7543502   | 174653701 | 1 | rs3767425  | 202413840 | 1.951E-27 |
| 907 | 1 | rs7543502   | 174653701 | 1 | rs3767421  | 202432160 | 1.951E-27 |
| 908 | 1 | rs80324733  | 174776328 | 1 | rs1890875  | 202531366 | 2.006E-27 |
| 909 | 1 | rs79763699  | 174729671 | 1 | rs2361453  | 202336314 | 2.022E-27 |
| 910 | 1 | rs139161617 | 174732199 | 1 | rs2361453  | 202336314 | 2.022E-27 |
| 911 | 1 | rs6673649   | 174733562 | 1 | rs2361453  | 202336314 | 2.022E-27 |
| 912 | 1 | rs75912125  | 174740527 | 1 | rs2361453  | 202336314 | 2.022E-27 |
| 913 | 1 | rs78199276  | 174706357 | 1 | rs10159280 | 202394287 | 2.054E-27 |
| 914 | 1 | rs6695956   | 174711947 | 1 | rs10159280 | 202394287 | 2.054E-27 |
| 915 | 1 | rs77727672  | 174718575 | 1 | rs10159280 | 202394287 | 2.054E-27 |
| 916 | 1 | rs79388999  | 174724332 | 1 | rs10159280 | 202394287 | 2.054E-27 |
| 917 | 1 | rs61329817  | 174724485 | 1 | rs10159280 | 202394287 | 2.054E-27 |
| 918 | 1 | rs56864802  | 174568929 | 1 | rs6427950  | 202472066 | 2.075E-27 |
| 919 | 1 | rs56864802  | 174568929 | 1 | rs3753908  | 202511295 | 2.075E-27 |
| 920 | 1 | rs56864802  | 174568929 | 1 | rs2249811  | 202531741 | 2.075E-27 |
| 921 | 1 | rs56864802  | 174568929 | 1 | rs925532   | 202533880 | 2.075E-27 |
| 922 | 1 | rs56864802  | 174568929 | 1 | rs925533   | 202534108 | 2.075E-27 |
| 923 | 1 | rs56864802  | 174568929 | 1 | rs3767397  | 202534389 | 2.075E-27 |
| 924 | 1 | rs56864802  | 174568929 | 1 | rs3767395  | 202536140 | 2.075E-27 |
| 925 | 1 | rs60240702  | 174569231 | 1 | rs6427950  | 202472066 | 2.075E-27 |
| 926 | 1 | rs60240702  | 174569231 | 1 | rs3753908  | 202511295 | 2.075E-27 |
| 927 | 1 | rs60240702  | 174569231 | 1 | rs2249811  | 202531741 | 2.075E-27 |
| 928 | 1 | rs60240702  | 174569231 | 1 | rs925532   | 202533880 | 2.075E-27 |
| 929 | 1 | rs60240702  | 174569231 | 1 | rs925533   | 202534108 | 2.075E-27 |
| 930 | 1 | rs60240702  | 174569231 | 1 | rs3767397  | 202534389 | 2.075E-27 |
| 931 | 1 | rs60240702  | 174569231 | 1 | rs3767395  | 202536140 | 2.075E-27 |

|     |   |             |           |   |            |           |           |
|-----|---|-------------|-----------|---|------------|-----------|-----------|
| 932 | 1 | rs77531515  | 174572000 | 1 | rs6427950  | 202472066 | 2.075E-27 |
| 933 | 1 | rs77531515  | 174572000 | 1 | rs3753908  | 202511295 | 2.075E-27 |
| 934 | 1 | rs77531515  | 174572000 | 1 | rs2249811  | 202531741 | 2.075E-27 |
| 935 | 1 | rs77531515  | 174572000 | 1 | rs925532   | 202533880 | 2.075E-27 |
| 936 | 1 | rs77531515  | 174572000 | 1 | rs925533   | 202534108 | 2.075E-27 |
| 937 | 1 | rs77531515  | 174572000 | 1 | rs3767397  | 202534389 | 2.075E-27 |
| 938 | 1 | rs77531515  | 174572000 | 1 | rs3767395  | 202536140 | 2.075E-27 |
| 939 | 1 | rs77025642  | 174572929 | 1 | rs6427950  | 202472066 | 2.075E-27 |
| 940 | 1 | rs77025642  | 174572929 | 1 | rs3753908  | 202511295 | 2.075E-27 |
| 941 | 1 | rs77025642  | 174572929 | 1 | rs2249811  | 202531741 | 2.075E-27 |
| 942 | 1 | rs77025642  | 174572929 | 1 | rs925532   | 202533880 | 2.075E-27 |
| 943 | 1 | rs77025642  | 174572929 | 1 | rs925533   | 202534108 | 2.075E-27 |
| 944 | 1 | rs77025642  | 174572929 | 1 | rs3767397  | 202534389 | 2.075E-27 |
| 945 | 1 | rs77025642  | 174572929 | 1 | rs3767395  | 202536140 | 2.075E-27 |
| 946 | 1 | rs79989938  | 174575187 | 1 | rs6427950  | 202472066 | 2.075E-27 |
| 947 | 1 | rs79989938  | 174575187 | 1 | rs3753908  | 202511295 | 2.075E-27 |
| 948 | 1 | rs79989938  | 174575187 | 1 | rs2249811  | 202531741 | 2.075E-27 |
| 949 | 1 | rs79989938  | 174575187 | 1 | rs925532   | 202533880 | 2.075E-27 |
| 950 | 1 | rs79989938  | 174575187 | 1 | rs925533   | 202534108 | 2.075E-27 |
| 951 | 1 | rs79989938  | 174575187 | 1 | rs3767397  | 202534389 | 2.075E-27 |
| 952 | 1 | rs79989938  | 174575187 | 1 | rs3767395  | 202536140 | 2.075E-27 |
| 953 | 1 | rs114289262 | 174587137 | 1 | rs6427950  | 202472066 | 2.078E-27 |
| 954 | 1 | rs114289262 | 174587137 | 1 | rs3753908  | 202511295 | 2.078E-27 |
| 955 | 1 | rs114289262 | 174587137 | 1 | rs2249811  | 202531741 | 2.078E-27 |
| 956 | 1 | rs114289262 | 174587137 | 1 | rs925532   | 202533880 | 2.078E-27 |
| 957 | 1 | rs114289262 | 174587137 | 1 | rs925533   | 202534108 | 2.078E-27 |
| 958 | 1 | rs114289262 | 174587137 | 1 | rs3767397  | 202534389 | 2.078E-27 |
| 959 | 1 | rs114289262 | 174587137 | 1 | rs3767395  | 202536140 | 2.078E-27 |
| 960 | 1 | rs7543502   | 174653701 | 1 | rs10920392 | 202321123 | 2.08E-27  |
| 961 | 1 | rs7543502   | 174653701 | 1 | rs6658708  | 202322113 | 2.08E-27  |
| 962 | 1 | rs80324733  | 174776328 | 1 | rs10800836 | 202410429 | 2.091E-27 |
| 963 | 1 | rs80324733  | 174776328 | 1 | rs3767425  | 202413840 | 2.091E-27 |
| 964 | 1 | rs80324733  | 174776328 | 1 | rs3767421  | 202432160 | 2.091E-27 |
| 965 | 1 | rs138190123 | 174555301 | 1 | rs930734   | 202318316 | 2.176E-27 |
| 966 | 1 | rs60885521  | 174591547 | 1 | rs10465591 | 202308344 | 2.183E-27 |
| 967 | 1 | rs79763699  | 174729671 | 1 | rs6427950  | 202472066 | 2.196E-27 |
| 968 | 1 | rs79763699  | 174729671 | 1 | rs3753908  | 202511295 | 2.196E-27 |
| 969 | 1 | rs79763699  | 174729671 | 1 | rs2249811  | 202531741 | 2.196E-27 |
| 970 | 1 | rs79763699  | 174729671 | 1 | rs925532   | 202533880 | 2.196E-27 |
| 971 | 1 | rs79763699  | 174729671 | 1 | rs925533   | 202534108 | 2.196E-27 |
| 972 | 1 | rs79763699  | 174729671 | 1 | rs3767397  | 202534389 | 2.196E-27 |
| 973 | 1 | rs79763699  | 174729671 | 1 | rs3767395  | 202536140 | 2.196E-27 |
| 974 | 1 | rs139161617 | 174732199 | 1 | rs6427950  | 202472066 | 2.196E-27 |
| 975 | 1 | rs139161617 | 174732199 | 1 | rs3753908  | 202511295 | 2.196E-27 |
| 976 | 1 | rs139161617 | 174732199 | 1 | rs2249811  | 202531741 | 2.196E-27 |
| 977 | 1 | rs139161617 | 174732199 | 1 | rs925532   | 202533880 | 2.196E-27 |
| 978 | 1 | rs139161617 | 174732199 | 1 | rs925533   | 202534108 | 2.196E-27 |
| 979 | 1 | rs139161617 | 174732199 | 1 | rs3767397  | 202534389 | 2.196E-27 |
| 980 | 1 | rs139161617 | 174732199 | 1 | rs3767395  | 202536140 | 2.196E-27 |
| 981 | 1 | rs6673649   | 174733562 | 1 | rs6427950  | 202472066 | 2.196E-27 |
| 982 | 1 | rs6673649   | 174733562 | 1 | rs3753908  | 202511295 | 2.196E-27 |
| 983 | 1 | rs6673649   | 174733562 | 1 | rs2249811  | 202531741 | 2.196E-27 |

|      |   |             |           |   |            |           |           |
|------|---|-------------|-----------|---|------------|-----------|-----------|
| 984  | 1 | rs6673649   | 174733562 | 1 | rs925532   | 202533880 | 2.196E-27 |
| 985  | 1 | rs6673649   | 174733562 | 1 | rs925533   | 202534108 | 2.196E-27 |
| 986  | 1 | rs6673649   | 174733562 | 1 | rs3767397  | 202534389 | 2.196E-27 |
| 987  | 1 | rs6673649   | 174733562 | 1 | rs3767395  | 202536140 | 2.196E-27 |
| 988  | 1 | rs75912125  | 174740527 | 1 | rs6427950  | 202472066 | 2.196E-27 |
| 989  | 1 | rs75912125  | 174740527 | 1 | rs3753908  | 202511295 | 2.196E-27 |
| 990  | 1 | rs75912125  | 174740527 | 1 | rs2249811  | 202531741 | 2.196E-27 |
| 991  | 1 | rs75912125  | 174740527 | 1 | rs925532   | 202533880 | 2.196E-27 |
| 992  | 1 | rs75912125  | 174740527 | 1 | rs925533   | 202534108 | 2.196E-27 |
| 993  | 1 | rs75912125  | 174740527 | 1 | rs3767397  | 202534389 | 2.196E-27 |
| 994  | 1 | rs75912125  | 174740527 | 1 | rs3767395  | 202536140 | 2.196E-27 |
| 995  | 1 | rs80324733  | 174776328 | 1 | rs10920392 | 202321123 | 2.216E-27 |
| 996  | 1 | rs80324733  | 174776328 | 1 | rs6658708  | 202322113 | 2.216E-27 |
| 997  | 1 | rs78583223  | 174766014 | 1 | rs2292489  | 202536848 | 2.241E-27 |
| 998  | 1 | rs76616345  | 174766778 | 1 | rs10159280 | 202394287 | 2.365E-27 |
| 999  | 1 | rs138190123 | 174555301 | 1 | rs2361453  | 202336314 | 2.412E-27 |
| 1000 | 1 | rs56864802  | 174568929 | 1 | rs1890875  | 202531366 | 2.556E-27 |
| 1001 | 1 | rs60240702  | 174569231 | 1 | rs1890875  | 202531366 | 2.556E-27 |
| 1002 | 1 | rs77531515  | 174572000 | 1 | rs1890875  | 202531366 | 2.556E-27 |
| 1003 | 1 | rs77025642  | 174572929 | 1 | rs1890875  | 202531366 | 2.556E-27 |
| 1004 | 1 | rs79989938  | 174575187 | 1 | rs1890875  | 202531366 | 2.556E-27 |
| 1005 | 1 | rs114289262 | 174587137 | 1 | rs1890875  | 202531366 | 2.561E-27 |
| 1006 | 1 | rs7543502   | 174653701 | 1 | rs10159280 | 202394287 | 2.562E-27 |
| 1007 | 1 | rs138190123 | 174555301 | 1 | rs6427950  | 202472066 | 2.597E-27 |
| 1008 | 1 | rs138190123 | 174555301 | 1 | rs3753908  | 202511295 | 2.597E-27 |
| 1009 | 1 | rs138190123 | 174555301 | 1 | rs2249811  | 202531741 | 2.597E-27 |
| 1010 | 1 | rs138190123 | 174555301 | 1 | rs925532   | 202533880 | 2.597E-27 |
| 1011 | 1 | rs138190123 | 174555301 | 1 | rs925533   | 202534108 | 2.597E-27 |
| 1012 | 1 | rs138190123 | 174555301 | 1 | rs3767397  | 202534389 | 2.597E-27 |
| 1013 | 1 | rs138190123 | 174555301 | 1 | rs3767395  | 202536140 | 2.597E-27 |
| 1014 | 1 | rs74225911  | 174519824 | 1 | rs2292489  | 202536848 | 2.63E-27  |
| 1015 | 1 | rs56864802  | 174568929 | 1 | rs10800836 | 202410429 | 2.679E-27 |
| 1016 | 1 | rs56864802  | 174568929 | 1 | rs3767425  | 202413840 | 2.679E-27 |
| 1017 | 1 | rs56864802  | 174568929 | 1 | rs3767421  | 202432160 | 2.679E-27 |
| 1018 | 1 | rs60240702  | 174569231 | 1 | rs10800836 | 202410429 | 2.679E-27 |
| 1019 | 1 | rs60240702  | 174569231 | 1 | rs3767425  | 202413840 | 2.679E-27 |
| 1020 | 1 | rs60240702  | 174569231 | 1 | rs3767421  | 202432160 | 2.679E-27 |
| 1021 | 1 | rs77531515  | 174572000 | 1 | rs10800836 | 202410429 | 2.679E-27 |
| 1022 | 1 | rs77531515  | 174572000 | 1 | rs3767425  | 202413840 | 2.679E-27 |
| 1023 | 1 | rs77531515  | 174572000 | 1 | rs3767421  | 202432160 | 2.679E-27 |
| 1024 | 1 | rs77025642  | 174572929 | 1 | rs10800836 | 202410429 | 2.679E-27 |
| 1025 | 1 | rs77025642  | 174572929 | 1 | rs3767425  | 202413840 | 2.679E-27 |
| 1026 | 1 | rs77025642  | 174572929 | 1 | rs3767421  | 202432160 | 2.679E-27 |
| 1027 | 1 | rs79989938  | 174575187 | 1 | rs10800836 | 202410429 | 2.679E-27 |
| 1028 | 1 | rs79989938  | 174575187 | 1 | rs3767425  | 202413840 | 2.679E-27 |
| 1029 | 1 | rs79989938  | 174575187 | 1 | rs3767421  | 202432160 | 2.679E-27 |
| 1030 | 1 | rs114289262 | 174587137 | 1 | rs10800836 | 202410429 | 2.684E-27 |
| 1031 | 1 | rs114289262 | 174587137 | 1 | rs3767425  | 202413840 | 2.684E-27 |
| 1032 | 1 | rs114289262 | 174587137 | 1 | rs3767421  | 202432160 | 2.684E-27 |
| 1033 | 1 | rs80324733  | 174776328 | 1 | rs10159280 | 202394287 | 2.695E-27 |
| 1034 | 1 | rs79763699  | 174729671 | 1 | rs1890875  | 202531366 | 2.698E-27 |
| 1035 | 1 | rs139161617 | 174732199 | 1 | rs1890875  | 202531366 | 2.698E-27 |



|      |   |             |           |   |            |           |           |
|------|---|-------------|-----------|---|------------|-----------|-----------|
| 1036 | 1 | rs6673649   | 174733562 | 1 | rs1890875  | 202531366 | 2.698E-27 |
| 1037 | 1 | rs75912125  | 174740527 | 1 | rs1890875  | 202531366 | 2.698E-27 |
| 1038 | 1 | rs59190079  | 174594608 | 1 | rs930734   | 202318316 | 2.747E-27 |
| 1039 | 1 | rs79763699  | 174729671 | 1 | rs10800836 | 202410429 | 2.824E-27 |
| 1040 | 1 | rs79763699  | 174729671 | 1 | rs3767425  | 202413840 | 2.824E-27 |
| 1041 | 1 | rs79763699  | 174729671 | 1 | rs3767421  | 202432160 | 2.824E-27 |
| 1042 | 1 | rs139161617 | 174732199 | 1 | rs10800836 | 202410429 | 2.824E-27 |
| 1043 | 1 | rs139161617 | 174732199 | 1 | rs3767425  | 202413840 | 2.824E-27 |
| 1044 | 1 | rs139161617 | 174732199 | 1 | rs3767421  | 202432160 | 2.824E-27 |
| 1045 | 1 | rs6673649   | 174733562 | 1 | rs10800836 | 202410429 | 2.824E-27 |
| 1046 | 1 | rs6673649   | 174733562 | 1 | rs3767425  | 202413840 | 2.824E-27 |
| 1047 | 1 | rs6673649   | 174733562 | 1 | rs3767421  | 202432160 | 2.824E-27 |
| 1048 | 1 | rs75912125  | 174740527 | 1 | rs10800836 | 202410429 | 2.824E-27 |
| 1049 | 1 | rs75912125  | 174740527 | 1 | rs3767425  | 202413840 | 2.824E-27 |
| 1050 | 1 | rs75912125  | 174740527 | 1 | rs3767421  | 202432160 | 2.824E-27 |
| 1051 | 1 | rs56864802  | 174568929 | 1 | rs10920392 | 202321123 | 2.867E-27 |
| 1052 | 1 | rs56864802  | 174568929 | 1 | rs6658708  | 202322113 | 2.867E-27 |
| 1053 | 1 | rs60240702  | 174569231 | 1 | rs10920392 | 202321123 | 2.867E-27 |
| 1054 | 1 | rs60240702  | 174569231 | 1 | rs6658708  | 202322113 | 2.867E-27 |
| 1055 | 1 | rs77531515  | 174572000 | 1 | rs10920392 | 202321123 | 2.867E-27 |
| 1056 | 1 | rs77531515  | 174572000 | 1 | rs6658708  | 202322113 | 2.867E-27 |
| 1057 | 1 | rs77025642  | 174572929 | 1 | rs10920392 | 202321123 | 2.867E-27 |
| 1058 | 1 | rs77025642  | 174572929 | 1 | rs6658708  | 202322113 | 2.867E-27 |
| 1059 | 1 | rs79989938  | 174575187 | 1 | rs10920392 | 202321123 | 2.867E-27 |
| 1060 | 1 | rs79989938  | 174575187 | 1 | rs6658708  | 202322113 | 2.867E-27 |
| 1061 | 1 | rs114289262 | 174587137 | 1 | rs10920392 | 202321123 | 2.88E-27  |
| 1062 | 1 | rs114289262 | 174587137 | 1 | rs6658708  | 202322113 | 2.88E-27  |
| 1063 | 1 | rs16847018  | 174419672 | 1 | rs930734   | 202318316 | 2.944E-27 |
| 1064 | 1 | rs16847025  | 174425858 | 1 | rs930734   | 202318316 | 2.944E-27 |
| 1065 | 1 | rs75368101  | 174447029 | 1 | rs930734   | 202318316 | 2.944E-27 |
| 1066 | 1 | rs74367921  | 174457505 | 1 | rs930734   | 202318316 | 2.944E-27 |
| 1067 | 1 | rs141587031 | 174458302 | 1 | rs930734   | 202318316 | 2.944E-27 |
| 1068 | 1 | rs75222047  | 174460751 | 1 | rs930734   | 202318316 | 2.944E-27 |
| 1069 | 1 | rs77684114  | 174461386 | 1 | rs930734   | 202318316 | 2.944E-27 |
| 1070 | 1 | rs79170014  | 174462952 | 1 | rs930734   | 202318316 | 2.944E-27 |
| 1071 | 1 | rs2901819   | 174467697 | 1 | rs930734   | 202318316 | 2.944E-27 |
| 1072 | 1 | rs58063264  | 174468442 | 1 | rs930734   | 202318316 | 2.944E-27 |
| 1073 | 1 | rs41397546  | 174476714 | 1 | rs930734   | 202318316 | 2.944E-27 |
| 1074 | 1 | rs16847121  | 174482433 | 1 | rs930734   | 202318316 | 2.944E-27 |
| 1075 | 1 | rs76886469  | 174488738 | 1 | rs930734   | 202318316 | 2.944E-27 |
| 1076 | 1 | rs57132183  | 174492721 | 1 | rs930734   | 202318316 | 2.944E-27 |
| 1077 | 1 | rs74651209  | 174501445 | 1 | rs930734   | 202318316 | 2.944E-27 |
| 1078 | 1 | rs59262554  | 174504233 | 1 | rs930734   | 202318316 | 2.944E-27 |
| 1079 | 1 | rs7547843   | 174507529 | 1 | rs930734   | 202318316 | 2.944E-27 |
| 1080 | 1 | rs142531097 | 174512268 | 1 | rs930734   | 202318316 | 2.944E-27 |
| 1081 | 1 | rs146786952 | 174514535 | 1 | rs930734   | 202318316 | 2.944E-27 |
| 1082 | 1 | rs41266052  | 174517443 | 1 | rs930734   | 202318316 | 2.944E-27 |
| 1083 | 1 | rs57898822  | 174531784 | 1 | rs930734   | 202318316 | 2.944E-27 |
| 1084 | 1 | rs75120198  | 174535022 | 1 | rs930734   | 202318316 | 2.944E-27 |
| 1085 | 1 | rs75134210  | 174536483 | 1 | rs930734   | 202318316 | 2.944E-27 |
| 1086 | 1 | rs2179109   | 174540259 | 1 | rs930734   | 202318316 | 2.944E-27 |
| 1087 | 1 | rs16847206  | 174541307 | 1 | rs930734   | 202318316 | 2.944E-27 |

|      |   |             |           |   |            |           |           |
|------|---|-------------|-----------|---|------------|-----------|-----------|
| 1088 | 1 | rs148694367 | 174544318 | 1 | rs930734   | 202318316 | 2.944E-27 |
| 1089 | 1 | rs143179310 | 174545451 | 1 | rs930734   | 202318316 | 2.944E-27 |
| 1090 | 1 | rs79763699  | 174729671 | 1 | rs10920392 | 202321123 | 3.014E-27 |
| 1091 | 1 | rs79763699  | 174729671 | 1 | rs6658708  | 202322113 | 3.014E-27 |
| 1092 | 1 | rs139161617 | 174732199 | 1 | rs10920392 | 202321123 | 3.014E-27 |
| 1093 | 1 | rs139161617 | 174732199 | 1 | rs6658708  | 202322113 | 3.014E-27 |
| 1094 | 1 | rs6673649   | 174733562 | 1 | rs10920392 | 202321123 | 3.014E-27 |
| 1095 | 1 | rs6673649   | 174733562 | 1 | rs6658708  | 202322113 | 3.014E-27 |
| 1096 | 1 | rs75912125  | 174740527 | 1 | rs10920392 | 202321123 | 3.014E-27 |
| 1097 | 1 | rs75912125  | 174740527 | 1 | rs6658708  | 202322113 | 3.014E-27 |
| 1098 | 1 | rs59190079  | 174594608 | 1 | rs2361453  | 202336314 | 3.037E-27 |
| 1099 | 1 | rs138190123 | 174555301 | 1 | rs1890875  | 202531366 | 3.202E-27 |
| 1100 | 1 | rs16847018  | 174419672 | 1 | rs2361453  | 202336314 | 3.258E-27 |
| 1101 | 1 | rs16847025  | 174425858 | 1 | rs2361453  | 202336314 | 3.258E-27 |
| 1102 | 1 | rs75368101  | 174447029 | 1 | rs2361453  | 202336314 | 3.258E-27 |
| 1103 | 1 | rs74367921  | 174457505 | 1 | rs2361453  | 202336314 | 3.258E-27 |
| 1104 | 1 | rs141587031 | 174458302 | 1 | rs2361453  | 202336314 | 3.258E-27 |
| 1105 | 1 | rs75222047  | 174460751 | 1 | rs2361453  | 202336314 | 3.258E-27 |
| 1106 | 1 | rs77684114  | 174461386 | 1 | rs2361453  | 202336314 | 3.258E-27 |
| 1107 | 1 | rs79170014  | 174462952 | 1 | rs2361453  | 202336314 | 3.258E-27 |
| 1108 | 1 | rs2901819   | 174467697 | 1 | rs2361453  | 202336314 | 3.258E-27 |
| 1109 | 1 | rs58063264  | 174468442 | 1 | rs2361453  | 202336314 | 3.258E-27 |
| 1110 | 1 | rs41397546  | 174476714 | 1 | rs2361453  | 202336314 | 3.258E-27 |
| 1111 | 1 | rs16847121  | 174482433 | 1 | rs2361453  | 202336314 | 3.258E-27 |
| 1112 | 1 | rs76886469  | 174488738 | 1 | rs2361453  | 202336314 | 3.258E-27 |
| 1113 | 1 | rs57132183  | 174492721 | 1 | rs2361453  | 202336314 | 3.258E-27 |
| 1114 | 1 | rs74651209  | 174501445 | 1 | rs2361453  | 202336314 | 3.258E-27 |
| 1115 | 1 | rs59262554  | 174504233 | 1 | rs2361453  | 202336314 | 3.258E-27 |
| 1116 | 1 | rs7547843   | 174507529 | 1 | rs2361453  | 202336314 | 3.258E-27 |
| 1117 | 1 | rs142531097 | 174512268 | 1 | rs2361453  | 202336314 | 3.258E-27 |
| 1118 | 1 | rs146786952 | 174514535 | 1 | rs2361453  | 202336314 | 3.258E-27 |
| 1119 | 1 | rs41266052  | 174517443 | 1 | rs2361453  | 202336314 | 3.258E-27 |
| 1120 | 1 | rs57898822  | 174531784 | 1 | rs2361453  | 202336314 | 3.258E-27 |
| 1121 | 1 | rs75120198  | 174535022 | 1 | rs2361453  | 202336314 | 3.258E-27 |
| 1122 | 1 | rs75134210  | 174536483 | 1 | rs2361453  | 202336314 | 3.258E-27 |
| 1123 | 1 | rs2179109   | 174540259 | 1 | rs2361453  | 202336314 | 3.258E-27 |
| 1124 | 1 | rs16847206  | 174541307 | 1 | rs2361453  | 202336314 | 3.258E-27 |
| 1125 | 1 | rs148694367 | 174544318 | 1 | rs2361453  | 202336314 | 3.258E-27 |
| 1126 | 1 | rs143179310 | 174545451 | 1 | rs2361453  | 202336314 | 3.258E-27 |
| 1127 | 1 | rs59190079  | 174594608 | 1 | rs6427950  | 202472066 | 3.286E-27 |
| 1128 | 1 | rs59190079  | 174594608 | 1 | rs3753908  | 202511295 | 3.286E-27 |
| 1129 | 1 | rs59190079  | 174594608 | 1 | rs2249811  | 202531741 | 3.286E-27 |
| 1130 | 1 | rs59190079  | 174594608 | 1 | rs925532   | 202533880 | 3.286E-27 |
| 1131 | 1 | rs59190079  | 174594608 | 1 | rs925533   | 202534108 | 3.286E-27 |
| 1132 | 1 | rs59190079  | 174594608 | 1 | rs3767397  | 202534389 | 3.286E-27 |
| 1133 | 1 | rs59190079  | 174594608 | 1 | rs3767395  | 202536140 | 3.286E-27 |
| 1134 | 1 | rs138190123 | 174555301 | 1 | rs10800836 | 202410429 | 3.353E-27 |
| 1135 | 1 | rs138190123 | 174555301 | 1 | rs3767425  | 202413840 | 3.353E-27 |
| 1136 | 1 | rs138190123 | 174555301 | 1 | rs3767421  | 202432160 | 3.353E-27 |
| 1137 | 1 | rs16847018  | 174419672 | 1 | rs6427950  | 202472066 | 3.52E-27  |
| 1138 | 1 | rs16847018  | 174419672 | 1 | rs3753908  | 202511295 | 3.52E-27  |
| 1139 | 1 | rs16847018  | 174419672 | 1 | rs2249811  | 202531741 | 3.52E-27  |

|      |   |             |           |   |           |           |          |
|------|---|-------------|-----------|---|-----------|-----------|----------|
| 1140 | 1 | rs16847018  | 174419672 | 1 | rs925532  | 202533880 | 3.52E-27 |
| 1141 | 1 | rs16847018  | 174419672 | 1 | rs925533  | 202534108 | 3.52E-27 |
| 1142 | 1 | rs16847018  | 174419672 | 1 | rs3767397 | 202534389 | 3.52E-27 |
| 1143 | 1 | rs16847018  | 174419672 | 1 | rs3767395 | 202536140 | 3.52E-27 |
| 1144 | 1 | rs16847025  | 174425858 | 1 | rs6427950 | 202472066 | 3.52E-27 |
| 1145 | 1 | rs16847025  | 174425858 | 1 | rs3753908 | 202511295 | 3.52E-27 |
| 1146 | 1 | rs16847025  | 174425858 | 1 | rs2249811 | 202531741 | 3.52E-27 |
| 1147 | 1 | rs16847025  | 174425858 | 1 | rs925532  | 202533880 | 3.52E-27 |
| 1148 | 1 | rs16847025  | 174425858 | 1 | rs925533  | 202534108 | 3.52E-27 |
| 1149 | 1 | rs16847025  | 174425858 | 1 | rs3767397 | 202534389 | 3.52E-27 |
| 1150 | 1 | rs16847025  | 174425858 | 1 | rs3767395 | 202536140 | 3.52E-27 |
| 1151 | 1 | rs75368101  | 174447029 | 1 | rs6427950 | 202472066 | 3.52E-27 |
| 1152 | 1 | rs75368101  | 174447029 | 1 | rs3753908 | 202511295 | 3.52E-27 |
| 1153 | 1 | rs75368101  | 174447029 | 1 | rs2249811 | 202531741 | 3.52E-27 |
| 1154 | 1 | rs75368101  | 174447029 | 1 | rs925532  | 202533880 | 3.52E-27 |
| 1155 | 1 | rs75368101  | 174447029 | 1 | rs925533  | 202534108 | 3.52E-27 |
| 1156 | 1 | rs75368101  | 174447029 | 1 | rs3767397 | 202534389 | 3.52E-27 |
| 1157 | 1 | rs75368101  | 174447029 | 1 | rs3767395 | 202536140 | 3.52E-27 |
| 1158 | 1 | rs74367921  | 174457505 | 1 | rs6427950 | 202472066 | 3.52E-27 |
| 1159 | 1 | rs74367921  | 174457505 | 1 | rs3753908 | 202511295 | 3.52E-27 |
| 1160 | 1 | rs74367921  | 174457505 | 1 | rs2249811 | 202531741 | 3.52E-27 |
| 1161 | 1 | rs74367921  | 174457505 | 1 | rs925532  | 202533880 | 3.52E-27 |
| 1162 | 1 | rs74367921  | 174457505 | 1 | rs925533  | 202534108 | 3.52E-27 |
| 1163 | 1 | rs74367921  | 174457505 | 1 | rs3767397 | 202534389 | 3.52E-27 |
| 1164 | 1 | rs74367921  | 174457505 | 1 | rs3767395 | 202536140 | 3.52E-27 |
| 1165 | 1 | rs141587031 | 174458302 | 1 | rs6427950 | 202472066 | 3.52E-27 |
| 1166 | 1 | rs141587031 | 174458302 | 1 | rs3753908 | 202511295 | 3.52E-27 |
| 1167 | 1 | rs141587031 | 174458302 | 1 | rs2249811 | 202531741 | 3.52E-27 |
| 1168 | 1 | rs141587031 | 174458302 | 1 | rs925532  | 202533880 | 3.52E-27 |
| 1169 | 1 | rs141587031 | 174458302 | 1 | rs925533  | 202534108 | 3.52E-27 |
| 1170 | 1 | rs141587031 | 174458302 | 1 | rs3767397 | 202534389 | 3.52E-27 |
| 1171 | 1 | rs141587031 | 174458302 | 1 | rs3767395 | 202536140 | 3.52E-27 |
| 1172 | 1 | rs75222047  | 174460751 | 1 | rs6427950 | 202472066 | 3.52E-27 |
| 1173 | 1 | rs75222047  | 174460751 | 1 | rs3753908 | 202511295 | 3.52E-27 |
| 1174 | 1 | rs75222047  | 174460751 | 1 | rs2249811 | 202531741 | 3.52E-27 |
| 1175 | 1 | rs75222047  | 174460751 | 1 | rs925532  | 202533880 | 3.52E-27 |
| 1176 | 1 | rs75222047  | 174460751 | 1 | rs925533  | 202534108 | 3.52E-27 |
| 1177 | 1 | rs75222047  | 174460751 | 1 | rs3767397 | 202534389 | 3.52E-27 |
| 1178 | 1 | rs75222047  | 174460751 | 1 | rs3767395 | 202536140 | 3.52E-27 |
| 1179 | 1 | rs77684114  | 174461386 | 1 | rs6427950 | 202472066 | 3.52E-27 |
| 1180 | 1 | rs77684114  | 174461386 | 1 | rs3753908 | 202511295 | 3.52E-27 |
| 1181 | 1 | rs77684114  | 174461386 | 1 | rs2249811 | 202531741 | 3.52E-27 |
| 1182 | 1 | rs77684114  | 174461386 | 1 | rs925532  | 202533880 | 3.52E-27 |
| 1183 | 1 | rs77684114  | 174461386 | 1 | rs925533  | 202534108 | 3.52E-27 |
| 1184 | 1 | rs77684114  | 174461386 | 1 | rs3767397 | 202534389 | 3.52E-27 |
| 1185 | 1 | rs77684114  | 174461386 | 1 | rs3767395 | 202536140 | 3.52E-27 |
| 1186 | 1 | rs79170014  | 174462952 | 1 | rs6427950 | 202472066 | 3.52E-27 |
| 1187 | 1 | rs79170014  | 174462952 | 1 | rs3753908 | 202511295 | 3.52E-27 |
| 1188 | 1 | rs79170014  | 174462952 | 1 | rs2249811 | 202531741 | 3.52E-27 |
| 1189 | 1 | rs79170014  | 174462952 | 1 | rs925532  | 202533880 | 3.52E-27 |
| 1190 | 1 | rs79170014  | 174462952 | 1 | rs925533  | 202534108 | 3.52E-27 |
| 1191 | 1 | rs79170014  | 174462952 | 1 | rs3767397 | 202534389 | 3.52E-27 |

|      |   |            |           |   |           |           |          |
|------|---|------------|-----------|---|-----------|-----------|----------|
| 1192 | 1 | rs79170014 | 174462952 | 1 | rs3767395 | 202536140 | 3.52E-27 |
| 1193 | 1 | rs2901819  | 174467697 | 1 | rs6427950 | 202472066 | 3.52E-27 |
| 1194 | 1 | rs2901819  | 174467697 | 1 | rs3753908 | 202511295 | 3.52E-27 |
| 1195 | 1 | rs2901819  | 174467697 | 1 | rs2249811 | 202531741 | 3.52E-27 |
| 1196 | 1 | rs2901819  | 174467697 | 1 | rs925532  | 202533880 | 3.52E-27 |
| 1197 | 1 | rs2901819  | 174467697 | 1 | rs925533  | 202534108 | 3.52E-27 |
| 1198 | 1 | rs2901819  | 174467697 | 1 | rs3767397 | 202534389 | 3.52E-27 |
| 1199 | 1 | rs2901819  | 174467697 | 1 | rs3767395 | 202536140 | 3.52E-27 |
| 1200 | 1 | rs58063264 | 174468442 | 1 | rs6427950 | 202472066 | 3.52E-27 |
| 1201 | 1 | rs58063264 | 174468442 | 1 | rs3753908 | 202511295 | 3.52E-27 |
| 1202 | 1 | rs58063264 | 174468442 | 1 | rs2249811 | 202531741 | 3.52E-27 |
| 1203 | 1 | rs58063264 | 174468442 | 1 | rs925532  | 202533880 | 3.52E-27 |
| 1204 | 1 | rs58063264 | 174468442 | 1 | rs925533  | 202534108 | 3.52E-27 |
| 1205 | 1 | rs58063264 | 174468442 | 1 | rs3767397 | 202534389 | 3.52E-27 |
| 1206 | 1 | rs58063264 | 174468442 | 1 | rs3767395 | 202536140 | 3.52E-27 |
| 1207 | 1 | rs41397546 | 174476714 | 1 | rs6427950 | 202472066 | 3.52E-27 |
| 1208 | 1 | rs41397546 | 174476714 | 1 | rs3753908 | 202511295 | 3.52E-27 |
| 1209 | 1 | rs41397546 | 174476714 | 1 | rs2249811 | 202531741 | 3.52E-27 |
| 1210 | 1 | rs41397546 | 174476714 | 1 | rs925532  | 202533880 | 3.52E-27 |
| 1211 | 1 | rs41397546 | 174476714 | 1 | rs925533  | 202534108 | 3.52E-27 |
| 1212 | 1 | rs41397546 | 174476714 | 1 | rs3767397 | 202534389 | 3.52E-27 |
| 1213 | 1 | rs41397546 | 174476714 | 1 | rs3767395 | 202536140 | 3.52E-27 |
| 1214 | 1 | rs16847121 | 174482433 | 1 | rs6427950 | 202472066 | 3.52E-27 |
| 1215 | 1 | rs16847121 | 174482433 | 1 | rs3753908 | 202511295 | 3.52E-27 |
| 1216 | 1 | rs16847121 | 174482433 | 1 | rs2249811 | 202531741 | 3.52E-27 |
| 1217 | 1 | rs16847121 | 174482433 | 1 | rs925532  | 202533880 | 3.52E-27 |
| 1218 | 1 | rs16847121 | 174482433 | 1 | rs925533  | 202534108 | 3.52E-27 |
| 1219 | 1 | rs16847121 | 174482433 | 1 | rs3767397 | 202534389 | 3.52E-27 |
| 1220 | 1 | rs16847121 | 174482433 | 1 | rs3767395 | 202536140 | 3.52E-27 |
| 1221 | 1 | rs76886469 | 174488738 | 1 | rs6427950 | 202472066 | 3.52E-27 |
| 1222 | 1 | rs76886469 | 174488738 | 1 | rs3753908 | 202511295 | 3.52E-27 |
| 1223 | 1 | rs76886469 | 174488738 | 1 | rs2249811 | 202531741 | 3.52E-27 |
| 1224 | 1 | rs76886469 | 174488738 | 1 | rs925532  | 202533880 | 3.52E-27 |
| 1225 | 1 | rs76886469 | 174488738 | 1 | rs925533  | 202534108 | 3.52E-27 |
| 1226 | 1 | rs76886469 | 174488738 | 1 | rs3767397 | 202534389 | 3.52E-27 |
| 1227 | 1 | rs76886469 | 174488738 | 1 | rs3767395 | 202536140 | 3.52E-27 |
| 1228 | 1 | rs57132183 | 174492721 | 1 | rs6427950 | 202472066 | 3.52E-27 |
| 1229 | 1 | rs57132183 | 174492721 | 1 | rs3753908 | 202511295 | 3.52E-27 |
| 1230 | 1 | rs57132183 | 174492721 | 1 | rs2249811 | 202531741 | 3.52E-27 |
| 1231 | 1 | rs57132183 | 174492721 | 1 | rs925532  | 202533880 | 3.52E-27 |
| 1232 | 1 | rs57132183 | 174492721 | 1 | rs925533  | 202534108 | 3.52E-27 |
| 1233 | 1 | rs57132183 | 174492721 | 1 | rs3767397 | 202534389 | 3.52E-27 |
| 1234 | 1 | rs57132183 | 174492721 | 1 | rs3767395 | 202536140 | 3.52E-27 |
| 1235 | 1 | rs74651209 | 174501445 | 1 | rs6427950 | 202472066 | 3.52E-27 |
| 1236 | 1 | rs74651209 | 174501445 | 1 | rs3753908 | 202511295 | 3.52E-27 |
| 1237 | 1 | rs74651209 | 174501445 | 1 | rs2249811 | 202531741 | 3.52E-27 |
| 1238 | 1 | rs74651209 | 174501445 | 1 | rs925532  | 202533880 | 3.52E-27 |
| 1239 | 1 | rs74651209 | 174501445 | 1 | rs925533  | 202534108 | 3.52E-27 |
| 1240 | 1 | rs74651209 | 174501445 | 1 | rs3767397 | 202534389 | 3.52E-27 |
| 1241 | 1 | rs74651209 | 174501445 | 1 | rs3767395 | 202536140 | 3.52E-27 |
| 1242 | 1 | rs59262554 | 174504233 | 1 | rs6427950 | 202472066 | 3.52E-27 |
| 1243 | 1 | rs59262554 | 174504233 | 1 | rs3753908 | 202511295 | 3.52E-27 |

|      |   |             |           |   |           |           |          |
|------|---|-------------|-----------|---|-----------|-----------|----------|
| 1244 | 1 | rs59262554  | 174504233 | 1 | rs2249811 | 202531741 | 3.52E-27 |
| 1245 | 1 | rs59262554  | 174504233 | 1 | rs925532  | 202533880 | 3.52E-27 |
| 1246 | 1 | rs59262554  | 174504233 | 1 | rs925533  | 202534108 | 3.52E-27 |
| 1247 | 1 | rs59262554  | 174504233 | 1 | rs3767397 | 202534389 | 3.52E-27 |
| 1248 | 1 | rs59262554  | 174504233 | 1 | rs3767395 | 202536140 | 3.52E-27 |
| 1249 | 1 | rs7547843   | 174507529 | 1 | rs6427950 | 202472066 | 3.52E-27 |
| 1250 | 1 | rs7547843   | 174507529 | 1 | rs3753908 | 202511295 | 3.52E-27 |
| 1251 | 1 | rs7547843   | 174507529 | 1 | rs2249811 | 202531741 | 3.52E-27 |
| 1252 | 1 | rs7547843   | 174507529 | 1 | rs925532  | 202533880 | 3.52E-27 |
| 1253 | 1 | rs7547843   | 174507529 | 1 | rs925533  | 202534108 | 3.52E-27 |
| 1254 | 1 | rs7547843   | 174507529 | 1 | rs3767397 | 202534389 | 3.52E-27 |
| 1255 | 1 | rs7547843   | 174507529 | 1 | rs3767395 | 202536140 | 3.52E-27 |
| 1256 | 1 | rs142531097 | 174512268 | 1 | rs6427950 | 202472066 | 3.52E-27 |
| 1257 | 1 | rs142531097 | 174512268 | 1 | rs3753908 | 202511295 | 3.52E-27 |
| 1258 | 1 | rs142531097 | 174512268 | 1 | rs2249811 | 202531741 | 3.52E-27 |
| 1259 | 1 | rs142531097 | 174512268 | 1 | rs925532  | 202533880 | 3.52E-27 |
| 1260 | 1 | rs142531097 | 174512268 | 1 | rs925533  | 202534108 | 3.52E-27 |
| 1261 | 1 | rs142531097 | 174512268 | 1 | rs3767397 | 202534389 | 3.52E-27 |
| 1262 | 1 | rs142531097 | 174512268 | 1 | rs3767395 | 202536140 | 3.52E-27 |
| 1263 | 1 | rs146786952 | 174514535 | 1 | rs6427950 | 202472066 | 3.52E-27 |
| 1264 | 1 | rs146786952 | 174514535 | 1 | rs3753908 | 202511295 | 3.52E-27 |
| 1265 | 1 | rs146786952 | 174514535 | 1 | rs2249811 | 202531741 | 3.52E-27 |
| 1266 | 1 | rs146786952 | 174514535 | 1 | rs925532  | 202533880 | 3.52E-27 |
| 1267 | 1 | rs146786952 | 174514535 | 1 | rs925533  | 202534108 | 3.52E-27 |
| 1268 | 1 | rs146786952 | 174514535 | 1 | rs3767397 | 202534389 | 3.52E-27 |
| 1269 | 1 | rs146786952 | 174514535 | 1 | rs3767395 | 202536140 | 3.52E-27 |
| 1270 | 1 | rs41266052  | 174517443 | 1 | rs6427950 | 202472066 | 3.52E-27 |
| 1271 | 1 | rs41266052  | 174517443 | 1 | rs3753908 | 202511295 | 3.52E-27 |
| 1272 | 1 | rs41266052  | 174517443 | 1 | rs2249811 | 202531741 | 3.52E-27 |
| 1273 | 1 | rs41266052  | 174517443 | 1 | rs925532  | 202533880 | 3.52E-27 |
| 1274 | 1 | rs41266052  | 174517443 | 1 | rs925533  | 202534108 | 3.52E-27 |
| 1275 | 1 | rs41266052  | 174517443 | 1 | rs3767397 | 202534389 | 3.52E-27 |
| 1276 | 1 | rs41266052  | 174517443 | 1 | rs3767395 | 202536140 | 3.52E-27 |
| 1277 | 1 | rs57898822  | 174531784 | 1 | rs6427950 | 202472066 | 3.52E-27 |
| 1278 | 1 | rs57898822  | 174531784 | 1 | rs3753908 | 202511295 | 3.52E-27 |
| 1279 | 1 | rs57898822  | 174531784 | 1 | rs2249811 | 202531741 | 3.52E-27 |
| 1280 | 1 | rs57898822  | 174531784 | 1 | rs925532  | 202533880 | 3.52E-27 |
| 1281 | 1 | rs57898822  | 174531784 | 1 | rs925533  | 202534108 | 3.52E-27 |
| 1282 | 1 | rs57898822  | 174531784 | 1 | rs3767397 | 202534389 | 3.52E-27 |
| 1283 | 1 | rs57898822  | 174531784 | 1 | rs3767395 | 202536140 | 3.52E-27 |
| 1284 | 1 | rs75120198  | 174535022 | 1 | rs6427950 | 202472066 | 3.52E-27 |
| 1285 | 1 | rs75120198  | 174535022 | 1 | rs3753908 | 202511295 | 3.52E-27 |
| 1286 | 1 | rs75120198  | 174535022 | 1 | rs2249811 | 202531741 | 3.52E-27 |
| 1287 | 1 | rs75120198  | 174535022 | 1 | rs925532  | 202533880 | 3.52E-27 |
| 1288 | 1 | rs75120198  | 174535022 | 1 | rs925533  | 202534108 | 3.52E-27 |
| 1289 | 1 | rs75120198  | 174535022 | 1 | rs3767397 | 202534389 | 3.52E-27 |
| 1290 | 1 | rs75120198  | 174535022 | 1 | rs3767395 | 202536140 | 3.52E-27 |
| 1291 | 1 | rs75134210  | 174536483 | 1 | rs6427950 | 202472066 | 3.52E-27 |
| 1292 | 1 | rs75134210  | 174536483 | 1 | rs3753908 | 202511295 | 3.52E-27 |
| 1293 | 1 | rs75134210  | 174536483 | 1 | rs2249811 | 202531741 | 3.52E-27 |
| 1294 | 1 | rs75134210  | 174536483 | 1 | rs925532  | 202533880 | 3.52E-27 |
| 1295 | 1 | rs75134210  | 174536483 | 1 | rs925533  | 202534108 | 3.52E-27 |

|      |   |             |           |   |            |           |           |
|------|---|-------------|-----------|---|------------|-----------|-----------|
| 1296 | 1 | rs75134210  | 174536483 | 1 | rs3767397  | 202534389 | 3.52E-27  |
| 1297 | 1 | rs75134210  | 174536483 | 1 | rs3767395  | 202536140 | 3.52E-27  |
| 1298 | 1 | rs2179109   | 174540259 | 1 | rs6427950  | 202472066 | 3.52E-27  |
| 1299 | 1 | rs2179109   | 174540259 | 1 | rs3753908  | 202511295 | 3.52E-27  |
| 1300 | 1 | rs2179109   | 174540259 | 1 | rs2249811  | 202531741 | 3.52E-27  |
| 1301 | 1 | rs2179109   | 174540259 | 1 | rs925532   | 202533880 | 3.52E-27  |
| 1302 | 1 | rs2179109   | 174540259 | 1 | rs925533   | 202534108 | 3.52E-27  |
| 1303 | 1 | rs2179109   | 174540259 | 1 | rs3767397  | 202534389 | 3.52E-27  |
| 1304 | 1 | rs2179109   | 174540259 | 1 | rs3767395  | 202536140 | 3.52E-27  |
| 1305 | 1 | rs16847206  | 174541307 | 1 | rs6427950  | 202472066 | 3.52E-27  |
| 1306 | 1 | rs16847206  | 174541307 | 1 | rs3753908  | 202511295 | 3.52E-27  |
| 1307 | 1 | rs16847206  | 174541307 | 1 | rs2249811  | 202531741 | 3.52E-27  |
| 1308 | 1 | rs16847206  | 174541307 | 1 | rs925532   | 202533880 | 3.52E-27  |
| 1309 | 1 | rs16847206  | 174541307 | 1 | rs925533   | 202534108 | 3.52E-27  |
| 1310 | 1 | rs16847206  | 174541307 | 1 | rs3767397  | 202534389 | 3.52E-27  |
| 1311 | 1 | rs16847206  | 174541307 | 1 | rs3767395  | 202536140 | 3.52E-27  |
| 1312 | 1 | rs148694367 | 174544318 | 1 | rs6427950  | 202472066 | 3.52E-27  |
| 1313 | 1 | rs148694367 | 174544318 | 1 | rs3753908  | 202511295 | 3.52E-27  |
| 1314 | 1 | rs148694367 | 174544318 | 1 | rs2249811  | 202531741 | 3.52E-27  |
| 1315 | 1 | rs148694367 | 174544318 | 1 | rs925532   | 202533880 | 3.52E-27  |
| 1316 | 1 | rs148694367 | 174544318 | 1 | rs925533   | 202534108 | 3.52E-27  |
| 1317 | 1 | rs148694367 | 174544318 | 1 | rs3767397  | 202534389 | 3.52E-27  |
| 1318 | 1 | rs148694367 | 174544318 | 1 | rs3767395  | 202536140 | 3.52E-27  |
| 1319 | 1 | rs143179310 | 174545451 | 1 | rs6427950  | 202472066 | 3.52E-27  |
| 1320 | 1 | rs143179310 | 174545451 | 1 | rs3753908  | 202511295 | 3.52E-27  |
| 1321 | 1 | rs143179310 | 174545451 | 1 | rs2249811  | 202531741 | 3.52E-27  |
| 1322 | 1 | rs143179310 | 174545451 | 1 | rs925532   | 202533880 | 3.52E-27  |
| 1323 | 1 | rs143179310 | 174545451 | 1 | rs925533   | 202534108 | 3.52E-27  |
| 1324 | 1 | rs143179310 | 174545451 | 1 | rs3767397  | 202534389 | 3.52E-27  |
| 1325 | 1 | rs143179310 | 174545451 | 1 | rs3767395  | 202536140 | 3.52E-27  |
| 1326 | 1 | rs56864802  | 174568929 | 1 | rs10159280 | 202394287 | 3.53E-27  |
| 1327 | 1 | rs60240702  | 174569231 | 1 | rs10159280 | 202394287 | 3.53E-27  |
| 1328 | 1 | rs77531515  | 174572000 | 1 | rs10159280 | 202394287 | 3.53E-27  |
| 1329 | 1 | rs77025642  | 174572929 | 1 | rs10159280 | 202394287 | 3.53E-27  |
| 1330 | 1 | rs79989938  | 174575187 | 1 | rs10159280 | 202394287 | 3.53E-27  |
| 1331 | 1 | rs114289262 | 174587137 | 1 | rs10159280 | 202394287 | 3.546E-27 |
| 1332 | 1 | rs138190123 | 174555301 | 1 | rs10920392 | 202321123 | 3.605E-27 |
| 1333 | 1 | rs138190123 | 174555301 | 1 | rs6658708  | 202322113 | 3.605E-27 |
| 1334 | 1 | rs78583223  | 174766014 | 1 | rs930734   | 202318316 | 3.609E-27 |
| 1335 | 1 | rs79763699  | 174729671 | 1 | rs10159280 | 202394287 | 3.701E-27 |
| 1336 | 1 | rs139161617 | 174732199 | 1 | rs10159280 | 202394287 | 3.701E-27 |
| 1337 | 1 | rs6673649   | 174733562 | 1 | rs10159280 | 202394287 | 3.701E-27 |
| 1338 | 1 | rs75912125  | 174740527 | 1 | rs10159280 | 202394287 | 3.701E-27 |
| 1339 | 1 | rs78583223  | 174766014 | 1 | rs2361453  | 202336314 | 3.979E-27 |
| 1340 | 1 | rs59190079  | 174594608 | 1 | rs1890875  | 202531366 | 4.048E-27 |
| 1341 | 1 | rs79387712  | 174605087 | 1 | rs2292489  | 202536848 | 4.197E-27 |
| 1342 | 1 | rs59190079  | 174594608 | 1 | rs10800836 | 202410429 | 4.235E-27 |
| 1343 | 1 | rs59190079  | 174594608 | 1 | rs3767425  | 202413840 | 4.235E-27 |
| 1344 | 1 | rs59190079  | 174594608 | 1 | rs3767421  | 202432160 | 4.235E-27 |
| 1345 | 1 | rs74225911  | 174519824 | 1 | rs930734   | 202318316 | 4.241E-27 |
| 1346 | 1 | rs78583223  | 174766014 | 1 | rs6427950  | 202472066 | 4.312E-27 |
| 1347 | 1 | rs78583223  | 174766014 | 1 | rs3753908  | 202511295 | 4.312E-27 |

|      |   |             |           |   |            |           |           |
|------|---|-------------|-----------|---|------------|-----------|-----------|
| 1348 | 1 | rs78583223  | 174766014 | 1 | rs2249811  | 202531741 | 4.312E-27 |
| 1349 | 1 | rs78583223  | 174766014 | 1 | rs925532   | 202533880 | 4.312E-27 |
| 1350 | 1 | rs78583223  | 174766014 | 1 | rs925533   | 202534108 | 4.312E-27 |
| 1351 | 1 | rs78583223  | 174766014 | 1 | rs3767397  | 202534389 | 4.312E-27 |
| 1352 | 1 | rs78583223  | 174766014 | 1 | rs3767395  | 202536140 | 4.312E-27 |
| 1353 | 1 | rs16847018  | 174419672 | 1 | rs1890875  | 202531366 | 4.333E-27 |
| 1354 | 1 | rs16847025  | 174425858 | 1 | rs1890875  | 202531366 | 4.333E-27 |
| 1355 | 1 | rs75368101  | 174447029 | 1 | rs1890875  | 202531366 | 4.333E-27 |
| 1356 | 1 | rs74367921  | 174457505 | 1 | rs1890875  | 202531366 | 4.333E-27 |
| 1357 | 1 | rs141587031 | 174458302 | 1 | rs1890875  | 202531366 | 4.333E-27 |
| 1358 | 1 | rs75222047  | 174460751 | 1 | rs1890875  | 202531366 | 4.333E-27 |
| 1359 | 1 | rs77684114  | 174461386 | 1 | rs1890875  | 202531366 | 4.333E-27 |
| 1360 | 1 | rs79170014  | 174462952 | 1 | rs1890875  | 202531366 | 4.333E-27 |
| 1361 | 1 | rs2901819   | 174467697 | 1 | rs1890875  | 202531366 | 4.333E-27 |
| 1362 | 1 | rs58063264  | 174468442 | 1 | rs1890875  | 202531366 | 4.333E-27 |
| 1363 | 1 | rs41397546  | 174476714 | 1 | rs1890875  | 202531366 | 4.333E-27 |
| 1364 | 1 | rs16847121  | 174482433 | 1 | rs1890875  | 202531366 | 4.333E-27 |
| 1365 | 1 | rs76886469  | 174488738 | 1 | rs1890875  | 202531366 | 4.333E-27 |
| 1366 | 1 | rs57132183  | 174492721 | 1 | rs1890875  | 202531366 | 4.333E-27 |
| 1367 | 1 | rs74651209  | 174501445 | 1 | rs1890875  | 202531366 | 4.333E-27 |
| 1368 | 1 | rs59262554  | 174504233 | 1 | rs1890875  | 202531366 | 4.333E-27 |
| 1369 | 1 | rs7547843   | 174507529 | 1 | rs1890875  | 202531366 | 4.333E-27 |
| 1370 | 1 | rs142531097 | 174512268 | 1 | rs1890875  | 202531366 | 4.333E-27 |
| 1371 | 1 | rs146786952 | 174514535 | 1 | rs1890875  | 202531366 | 4.333E-27 |
| 1372 | 1 | rs41266052  | 174517443 | 1 | rs1890875  | 202531366 | 4.333E-27 |
| 1373 | 1 | rs57898822  | 174531784 | 1 | rs1890875  | 202531366 | 4.333E-27 |
| 1374 | 1 | rs75120198  | 174535022 | 1 | rs1890875  | 202531366 | 4.333E-27 |
| 1375 | 1 | rs75134210  | 174536483 | 1 | rs1890875  | 202531366 | 4.333E-27 |
| 1376 | 1 | rs2179109   | 174540259 | 1 | rs1890875  | 202531366 | 4.333E-27 |
| 1377 | 1 | rs16847206  | 174541307 | 1 | rs1890875  | 202531366 | 4.333E-27 |
| 1378 | 1 | rs148694367 | 174544318 | 1 | rs1890875  | 202531366 | 4.333E-27 |
| 1379 | 1 | rs143179310 | 174545451 | 1 | rs1890875  | 202531366 | 4.333E-27 |
| 1380 | 1 | rs60723087  | 174655617 | 1 | rs10465591 | 202308344 | 4.341E-27 |
| 1381 | 1 | rs75062924  | 174664341 | 1 | rs10465591 | 202308344 | 4.341E-27 |
| 1382 | 1 | rs74739388  | 174666752 | 1 | rs10465591 | 202308344 | 4.341E-27 |
| 1383 | 1 | rs74225917  | 174686241 | 1 | rs10465591 | 202308344 | 4.341E-27 |
| 1384 | 1 | rs59354288  | 174687003 | 1 | rs10465591 | 202308344 | 4.341E-27 |
| 1385 | 1 | rs60665754  | 174687287 | 1 | rs10465591 | 202308344 | 4.341E-27 |
| 1386 | 1 | rs76014701  | 174690404 | 1 | rs10465591 | 202308344 | 4.341E-27 |
| 1387 | 1 | rs74365829  | 174690558 | 1 | rs10465591 | 202308344 | 4.341E-27 |
| 1388 | 1 | rs138190123 | 174555301 | 1 | rs10159280 | 202394287 | 4.44E-27  |
| 1389 | 1 | rs59190079  | 174594608 | 1 | rs10920392 | 202321123 | 4.533E-27 |
| 1390 | 1 | rs59190079  | 174594608 | 1 | rs6658708  | 202322113 | 4.533E-27 |
| 1391 | 1 | rs16847018  | 174419672 | 1 | rs10800836 | 202410429 | 4.539E-27 |
| 1392 | 1 | rs16847018  | 174419672 | 1 | rs3767425  | 202413840 | 4.539E-27 |
| 1393 | 1 | rs16847018  | 174419672 | 1 | rs3767421  | 202432160 | 4.539E-27 |
| 1394 | 1 | rs16847025  | 174425858 | 1 | rs10800836 | 202410429 | 4.539E-27 |
| 1395 | 1 | rs16847025  | 174425858 | 1 | rs3767425  | 202413840 | 4.539E-27 |
| 1396 | 1 | rs16847025  | 174425858 | 1 | rs3767421  | 202432160 | 4.539E-27 |
| 1397 | 1 | rs75368101  | 174447029 | 1 | rs10800836 | 202410429 | 4.539E-27 |
| 1398 | 1 | rs75368101  | 174447029 | 1 | rs3767425  | 202413840 | 4.539E-27 |
| 1399 | 1 | rs75368101  | 174447029 | 1 | rs3767421  | 202432160 | 4.539E-27 |

|      |   |             |           |   |            |           |           |
|------|---|-------------|-----------|---|------------|-----------|-----------|
| 1400 | 1 | rs74367921  | 174457505 | 1 | rs10800836 | 202410429 | 4.539E-27 |
| 1401 | 1 | rs74367921  | 174457505 | 1 | rs3767425  | 202413840 | 4.539E-27 |
| 1402 | 1 | rs74367921  | 174457505 | 1 | rs3767421  | 202432160 | 4.539E-27 |
| 1403 | 1 | rs141587031 | 174458302 | 1 | rs10800836 | 202410429 | 4.539E-27 |
| 1404 | 1 | rs141587031 | 174458302 | 1 | rs3767425  | 202413840 | 4.539E-27 |
| 1405 | 1 | rs141587031 | 174458302 | 1 | rs3767421  | 202432160 | 4.539E-27 |
| 1406 | 1 | rs75222047  | 174460751 | 1 | rs10800836 | 202410429 | 4.539E-27 |
| 1407 | 1 | rs75222047  | 174460751 | 1 | rs3767425  | 202413840 | 4.539E-27 |
| 1408 | 1 | rs75222047  | 174460751 | 1 | rs3767421  | 202432160 | 4.539E-27 |
| 1409 | 1 | rs77684114  | 174461386 | 1 | rs10800836 | 202410429 | 4.539E-27 |
| 1410 | 1 | rs77684114  | 174461386 | 1 | rs3767425  | 202413840 | 4.539E-27 |
| 1411 | 1 | rs77684114  | 174461386 | 1 | rs3767421  | 202432160 | 4.539E-27 |
| 1412 | 1 | rs79170014  | 174462952 | 1 | rs10800836 | 202410429 | 4.539E-27 |
| 1413 | 1 | rs79170014  | 174462952 | 1 | rs3767425  | 202413840 | 4.539E-27 |
| 1414 | 1 | rs79170014  | 174462952 | 1 | rs3767421  | 202432160 | 4.539E-27 |
| 1415 | 1 | rs2901819   | 174467697 | 1 | rs10800836 | 202410429 | 4.539E-27 |
| 1416 | 1 | rs2901819   | 174467697 | 1 | rs3767425  | 202413840 | 4.539E-27 |
| 1417 | 1 | rs2901819   | 174467697 | 1 | rs3767421  | 202432160 | 4.539E-27 |
| 1418 | 1 | rs58063264  | 174468442 | 1 | rs10800836 | 202410429 | 4.539E-27 |
| 1419 | 1 | rs58063264  | 174468442 | 1 | rs3767425  | 202413840 | 4.539E-27 |
| 1420 | 1 | rs58063264  | 174468442 | 1 | rs3767421  | 202432160 | 4.539E-27 |
| 1421 | 1 | rs41397546  | 174476714 | 1 | rs10800836 | 202410429 | 4.539E-27 |
| 1422 | 1 | rs41397546  | 174476714 | 1 | rs3767425  | 202413840 | 4.539E-27 |
| 1423 | 1 | rs41397546  | 174476714 | 1 | rs3767421  | 202432160 | 4.539E-27 |
| 1424 | 1 | rs16847121  | 174482433 | 1 | rs10800836 | 202410429 | 4.539E-27 |
| 1425 | 1 | rs16847121  | 174482433 | 1 | rs3767425  | 202413840 | 4.539E-27 |
| 1426 | 1 | rs16847121  | 174482433 | 1 | rs3767421  | 202432160 | 4.539E-27 |
| 1427 | 1 | rs76886469  | 174488738 | 1 | rs10800836 | 202410429 | 4.539E-27 |
| 1428 | 1 | rs76886469  | 174488738 | 1 | rs3767425  | 202413840 | 4.539E-27 |
| 1429 | 1 | rs76886469  | 174488738 | 1 | rs3767421  | 202432160 | 4.539E-27 |
| 1430 | 1 | rs57132183  | 174492721 | 1 | rs10800836 | 202410429 | 4.539E-27 |
| 1431 | 1 | rs57132183  | 174492721 | 1 | rs3767425  | 202413840 | 4.539E-27 |
| 1432 | 1 | rs57132183  | 174492721 | 1 | rs3767421  | 202432160 | 4.539E-27 |
| 1433 | 1 | rs74651209  | 174501445 | 1 | rs10800836 | 202410429 | 4.539E-27 |
| 1434 | 1 | rs74651209  | 174501445 | 1 | rs3767425  | 202413840 | 4.539E-27 |
| 1435 | 1 | rs74651209  | 174501445 | 1 | rs3767421  | 202432160 | 4.539E-27 |
| 1436 | 1 | rs59262554  | 174504233 | 1 | rs10800836 | 202410429 | 4.539E-27 |
| 1437 | 1 | rs59262554  | 174504233 | 1 | rs3767425  | 202413840 | 4.539E-27 |
| 1438 | 1 | rs59262554  | 174504233 | 1 | rs3767421  | 202432160 | 4.539E-27 |
| 1439 | 1 | rs7547843   | 174507529 | 1 | rs10800836 | 202410429 | 4.539E-27 |
| 1440 | 1 | rs7547843   | 174507529 | 1 | rs3767425  | 202413840 | 4.539E-27 |
| 1441 | 1 | rs7547843   | 174507529 | 1 | rs3767421  | 202432160 | 4.539E-27 |
| 1442 | 1 | rs142531097 | 174512268 | 1 | rs10800836 | 202410429 | 4.539E-27 |
| 1443 | 1 | rs142531097 | 174512268 | 1 | rs3767425  | 202413840 | 4.539E-27 |
| 1444 | 1 | rs142531097 | 174512268 | 1 | rs3767421  | 202432160 | 4.539E-27 |
| 1445 | 1 | rs146786952 | 174514535 | 1 | rs10800836 | 202410429 | 4.539E-27 |
| 1446 | 1 | rs146786952 | 174514535 | 1 | rs3767425  | 202413840 | 4.539E-27 |
| 1447 | 1 | rs146786952 | 174514535 | 1 | rs3767421  | 202432160 | 4.539E-27 |
| 1448 | 1 | rs41266052  | 174517443 | 1 | rs10800836 | 202410429 | 4.539E-27 |
| 1449 | 1 | rs41266052  | 174517443 | 1 | rs3767425  | 202413840 | 4.539E-27 |
| 1450 | 1 | rs41266052  | 174517443 | 1 | rs3767421  | 202432160 | 4.539E-27 |
| 1451 | 1 | rs57898822  | 174531784 | 1 | rs10800836 | 202410429 | 4.539E-27 |



|      |   |             |           |   |            |           |           |
|------|---|-------------|-----------|---|------------|-----------|-----------|
| 1452 | 1 | rs57898822  | 174531784 | 1 | rs3767425  | 202413840 | 4.539E-27 |
| 1453 | 1 | rs57898822  | 174531784 | 1 | rs3767421  | 202432160 | 4.539E-27 |
| 1454 | 1 | rs75120198  | 174535022 | 1 | rs10800836 | 202410429 | 4.539E-27 |
| 1455 | 1 | rs75120198  | 174535022 | 1 | rs3767425  | 202413840 | 4.539E-27 |
| 1456 | 1 | rs75120198  | 174535022 | 1 | rs3767421  | 202432160 | 4.539E-27 |
| 1457 | 1 | rs75134210  | 174536483 | 1 | rs10800836 | 202410429 | 4.539E-27 |
| 1458 | 1 | rs75134210  | 174536483 | 1 | rs3767425  | 202413840 | 4.539E-27 |
| 1459 | 1 | rs75134210  | 174536483 | 1 | rs3767421  | 202432160 | 4.539E-27 |
| 1460 | 1 | rs2179109   | 174540259 | 1 | rs10800836 | 202410429 | 4.539E-27 |
| 1461 | 1 | rs2179109   | 174540259 | 1 | rs3767425  | 202413840 | 4.539E-27 |
| 1462 | 1 | rs2179109   | 174540259 | 1 | rs3767421  | 202432160 | 4.539E-27 |
| 1463 | 1 | rs16847206  | 174541307 | 1 | rs10800836 | 202410429 | 4.539E-27 |
| 1464 | 1 | rs16847206  | 174541307 | 1 | rs3767425  | 202413840 | 4.539E-27 |
| 1465 | 1 | rs16847206  | 174541307 | 1 | rs3767421  | 202432160 | 4.539E-27 |
| 1466 | 1 | rs148694367 | 174544318 | 1 | rs10800836 | 202410429 | 4.539E-27 |
| 1467 | 1 | rs148694367 | 174544318 | 1 | rs3767425  | 202413840 | 4.539E-27 |
| 1468 | 1 | rs148694367 | 174544318 | 1 | rs3767421  | 202432160 | 4.539E-27 |
| 1469 | 1 | rs143179310 | 174545451 | 1 | rs10800836 | 202410429 | 4.539E-27 |
| 1470 | 1 | rs143179310 | 174545451 | 1 | rs3767425  | 202413840 | 4.539E-27 |
| 1471 | 1 | rs143179310 | 174545451 | 1 | rs3767421  | 202432160 | 4.539E-27 |
| 1472 | 1 | rs74225911  | 174519824 | 1 | rs2361453  | 202336314 | 4.684E-27 |
| 1473 | 1 | rs76616345  | 174766778 | 1 | rs10465591 | 202308344 | 4.701E-27 |
| 1474 | 1 | rs16847018  | 174419672 | 1 | rs10920392 | 202321123 | 4.859E-27 |
| 1475 | 1 | rs16847018  | 174419672 | 1 | rs6658708  | 202322113 | 4.859E-27 |
| 1476 | 1 | rs16847025  | 174425858 | 1 | rs10920392 | 202321123 | 4.859E-27 |
| 1477 | 1 | rs16847025  | 174425858 | 1 | rs6658708  | 202322113 | 4.859E-27 |
| 1478 | 1 | rs75368101  | 174447029 | 1 | rs10920392 | 202321123 | 4.859E-27 |
| 1479 | 1 | rs75368101  | 174447029 | 1 | rs6658708  | 202322113 | 4.859E-27 |
| 1480 | 1 | rs74367921  | 174457505 | 1 | rs10920392 | 202321123 | 4.859E-27 |
| 1481 | 1 | rs74367921  | 174457505 | 1 | rs6658708  | 202322113 | 4.859E-27 |
| 1482 | 1 | rs141587031 | 174458302 | 1 | rs10920392 | 202321123 | 4.859E-27 |
| 1483 | 1 | rs141587031 | 174458302 | 1 | rs6658708  | 202322113 | 4.859E-27 |
| 1484 | 1 | rs75222047  | 174460751 | 1 | rs10920392 | 202321123 | 4.859E-27 |
| 1485 | 1 | rs75222047  | 174460751 | 1 | rs6658708  | 202322113 | 4.859E-27 |
| 1486 | 1 | rs77684114  | 174461386 | 1 | rs10920392 | 202321123 | 4.859E-27 |
| 1487 | 1 | rs77684114  | 174461386 | 1 | rs6658708  | 202322113 | 4.859E-27 |
| 1488 | 1 | rs79170014  | 174462952 | 1 | rs10920392 | 202321123 | 4.859E-27 |
| 1489 | 1 | rs79170014  | 174462952 | 1 | rs6658708  | 202322113 | 4.859E-27 |
| 1490 | 1 | rs2901819   | 174467697 | 1 | rs10920392 | 202321123 | 4.859E-27 |
| 1491 | 1 | rs2901819   | 174467697 | 1 | rs6658708  | 202322113 | 4.859E-27 |
| 1492 | 1 | rs58063264  | 174468442 | 1 | rs10920392 | 202321123 | 4.859E-27 |
| 1493 | 1 | rs58063264  | 174468442 | 1 | rs6658708  | 202322113 | 4.859E-27 |
| 1494 | 1 | rs41397546  | 174476714 | 1 | rs10920392 | 202321123 | 4.859E-27 |
| 1495 | 1 | rs41397546  | 174476714 | 1 | rs6658708  | 202322113 | 4.859E-27 |
| 1496 | 1 | rs16847121  | 174482433 | 1 | rs10920392 | 202321123 | 4.859E-27 |
| 1497 | 1 | rs16847121  | 174482433 | 1 | rs6658708  | 202322113 | 4.859E-27 |
| 1498 | 1 | rs76886469  | 174488738 | 1 | rs10920392 | 202321123 | 4.859E-27 |
| 1499 | 1 | rs76886469  | 174488738 | 1 | rs6658708  | 202322113 | 4.859E-27 |
| 1500 | 1 | rs57132183  | 174492721 | 1 | rs10920392 | 202321123 | 4.859E-27 |
| 1501 | 1 | rs57132183  | 174492721 | 1 | rs6658708  | 202322113 | 4.859E-27 |
| 1502 | 1 | rs74651209  | 174501445 | 1 | rs10920392 | 202321123 | 4.859E-27 |
| 1503 | 1 | rs74651209  | 174501445 | 1 | rs6658708  | 202322113 | 4.859E-27 |

|      |   |             |           |   |            |           |           |
|------|---|-------------|-----------|---|------------|-----------|-----------|
| 1504 | 1 | rs59262554  | 174504233 | 1 | rs10920392 | 202321123 | 4.859E-27 |
| 1505 | 1 | rs59262554  | 174504233 | 1 | rs6658708  | 202322113 | 4.859E-27 |
| 1506 | 1 | rs7547843   | 174507529 | 1 | rs10920392 | 202321123 | 4.859E-27 |
| 1507 | 1 | rs7547843   | 174507529 | 1 | rs6658708  | 202322113 | 4.859E-27 |
| 1508 | 1 | rs142531097 | 174512268 | 1 | rs10920392 | 202321123 | 4.859E-27 |
| 1509 | 1 | rs142531097 | 174512268 | 1 | rs6658708  | 202322113 | 4.859E-27 |
| 1510 | 1 | rs146786952 | 174514535 | 1 | rs10920392 | 202321123 | 4.859E-27 |
| 1511 | 1 | rs146786952 | 174514535 | 1 | rs6658708  | 202322113 | 4.859E-27 |
| 1512 | 1 | rs41266052  | 174517443 | 1 | rs10920392 | 202321123 | 4.859E-27 |
| 1513 | 1 | rs41266052  | 174517443 | 1 | rs6658708  | 202322113 | 4.859E-27 |
| 1514 | 1 | rs57898822  | 174531784 | 1 | rs10920392 | 202321123 | 4.859E-27 |
| 1515 | 1 | rs57898822  | 174531784 | 1 | rs6658708  | 202322113 | 4.859E-27 |
| 1516 | 1 | rs75120198  | 174535022 | 1 | rs10920392 | 202321123 | 4.859E-27 |
| 1517 | 1 | rs75120198  | 174535022 | 1 | rs6658708  | 202322113 | 4.859E-27 |
| 1518 | 1 | rs75134210  | 174536483 | 1 | rs10920392 | 202321123 | 4.859E-27 |
| 1519 | 1 | rs75134210  | 174536483 | 1 | rs6658708  | 202322113 | 4.859E-27 |
| 1520 | 1 | rs2179109   | 174540259 | 1 | rs10920392 | 202321123 | 4.859E-27 |
| 1521 | 1 | rs2179109   | 174540259 | 1 | rs6658708  | 202322113 | 4.859E-27 |
| 1522 | 1 | rs16847206  | 174541307 | 1 | rs10920392 | 202321123 | 4.859E-27 |
| 1523 | 1 | rs16847206  | 174541307 | 1 | rs6658708  | 202322113 | 4.859E-27 |
| 1524 | 1 | rs148694367 | 174544318 | 1 | rs10920392 | 202321123 | 4.859E-27 |
| 1525 | 1 | rs148694367 | 174544318 | 1 | rs6658708  | 202322113 | 4.859E-27 |
| 1526 | 1 | rs143179310 | 174545451 | 1 | rs10920392 | 202321123 | 4.859E-27 |
| 1527 | 1 | rs143179310 | 174545451 | 1 | rs6658708  | 202322113 | 4.859E-27 |
| 1528 | 1 | rs79728530  | 174402618 | 1 | rs2292489  | 202536848 | 5.035E-27 |
| 1529 | 1 | rs78199276  | 174706357 | 1 | rs10465591 | 202308344 | 5.075E-27 |
| 1530 | 1 | rs6695956   | 174711947 | 1 | rs10465591 | 202308344 | 5.075E-27 |
| 1531 | 1 | rs77727672  | 174718575 | 1 | rs10465591 | 202308344 | 5.075E-27 |
| 1532 | 1 | rs79388999  | 174724332 | 1 | rs10465591 | 202308344 | 5.075E-27 |
| 1533 | 1 | rs61329817  | 174724485 | 1 | rs10465591 | 202308344 | 5.075E-27 |
| 1534 | 1 | rs74225911  | 174519824 | 1 | rs6427950  | 202472066 | 5.076E-27 |
| 1535 | 1 | rs74225911  | 174519824 | 1 | rs3753908  | 202511295 | 5.076E-27 |
| 1536 | 1 | rs74225911  | 174519824 | 1 | rs2249811  | 202531741 | 5.076E-27 |
| 1537 | 1 | rs74225911  | 174519824 | 1 | rs925532   | 202533880 | 5.076E-27 |
| 1538 | 1 | rs74225911  | 174519824 | 1 | rs925533   | 202534108 | 5.076E-27 |
| 1539 | 1 | rs74225911  | 174519824 | 1 | rs3767397  | 202534389 | 5.076E-27 |
| 1540 | 1 | rs74225911  | 174519824 | 1 | rs3767395  | 202536140 | 5.076E-27 |
| 1541 | 1 | rs76881580  | 174855306 | 1 | rs705742   | 202461982 | 5.216E-27 |
| 1542 | 1 | rs78583223  | 174766014 | 1 | rs1890875  | 202531366 | 5.299E-27 |
| 1543 | 1 | rs78583223  | 174766014 | 1 | rs10800836 | 202410429 | 5.548E-27 |
| 1544 | 1 | rs78583223  | 174766014 | 1 | rs3767425  | 202413840 | 5.548E-27 |
| 1545 | 1 | rs78583223  | 174766014 | 1 | rs3767421  | 202432160 | 5.548E-27 |
| 1546 | 1 | rs59190079  | 174594608 | 1 | rs10159280 | 202394287 | 5.58E-27  |
| 1547 | 1 | rs78583223  | 174766014 | 1 | rs10920392 | 202321123 | 5.922E-27 |
| 1548 | 1 | rs78583223  | 174766014 | 1 | rs6658708  | 202322113 | 5.922E-27 |
| 1549 | 1 | rs16847018  | 174419672 | 1 | rs10159280 | 202394287 | 5.977E-27 |
| 1550 | 1 | rs16847025  | 174425858 | 1 | rs10159280 | 202394287 | 5.977E-27 |
| 1551 | 1 | rs75368101  | 174447029 | 1 | rs10159280 | 202394287 | 5.977E-27 |
| 1552 | 1 | rs74367921  | 174457505 | 1 | rs10159280 | 202394287 | 5.977E-27 |
| 1553 | 1 | rs141587031 | 174458302 | 1 | rs10159280 | 202394287 | 5.977E-27 |
| 1554 | 1 | rs75222047  | 174460751 | 1 | rs10159280 | 202394287 | 5.977E-27 |
| 1555 | 1 | rs77684114  | 174461386 | 1 | rs10159280 | 202394287 | 5.977E-27 |

|      |   |             |           |   |            |           |           |
|------|---|-------------|-----------|---|------------|-----------|-----------|
| 1556 | 1 | rs79170014  | 174462952 | 1 | rs10159280 | 202394287 | 5.977E-27 |
| 1557 | 1 | rs2901819   | 174467697 | 1 | rs10159280 | 202394287 | 5.977E-27 |
| 1558 | 1 | rs58063264  | 174468442 | 1 | rs10159280 | 202394287 | 5.977E-27 |
| 1559 | 1 | rs41397546  | 174476714 | 1 | rs10159280 | 202394287 | 5.977E-27 |
| 1560 | 1 | rs16847121  | 174482433 | 1 | rs10159280 | 202394287 | 5.977E-27 |
| 1561 | 1 | rs76886469  | 174488738 | 1 | rs10159280 | 202394287 | 5.977E-27 |
| 1562 | 1 | rs57132183  | 174492721 | 1 | rs10159280 | 202394287 | 5.977E-27 |
| 1563 | 1 | rs74651209  | 174501445 | 1 | rs10159280 | 202394287 | 5.977E-27 |
| 1564 | 1 | rs59262554  | 174504233 | 1 | rs10159280 | 202394287 | 5.977E-27 |
| 1565 | 1 | rs7547843   | 174507529 | 1 | rs10159280 | 202394287 | 5.977E-27 |
| 1566 | 1 | rs142531097 | 174512268 | 1 | rs10159280 | 202394287 | 5.977E-27 |
| 1567 | 1 | rs146786952 | 174514535 | 1 | rs10159280 | 202394287 | 5.977E-27 |
| 1568 | 1 | rs41266052  | 174517443 | 1 | rs10159280 | 202394287 | 5.977E-27 |
| 1569 | 1 | rs57898822  | 174531784 | 1 | rs10159280 | 202394287 | 5.977E-27 |
| 1570 | 1 | rs75120198  | 174535022 | 1 | rs10159280 | 202394287 | 5.977E-27 |
| 1571 | 1 | rs75134210  | 174536483 | 1 | rs10159280 | 202394287 | 5.977E-27 |
| 1572 | 1 | rs2179109   | 174540259 | 1 | rs10159280 | 202394287 | 5.977E-27 |
| 1573 | 1 | rs16847206  | 174541307 | 1 | rs10159280 | 202394287 | 5.977E-27 |
| 1574 | 1 | rs148694367 | 174544318 | 1 | rs10159280 | 202394287 | 5.977E-27 |
| 1575 | 1 | rs143179310 | 174545451 | 1 | rs10159280 | 202394287 | 5.977E-27 |
| 1576 | 1 | rs74225911  | 174519824 | 1 | rs1890875  | 202531366 | 6.248E-27 |
| 1577 | 1 | rs80324733  | 174776328 | 1 | rs10465591 | 202308344 | 6.253E-27 |
| 1578 | 1 | rs7543502   | 174653701 | 1 | rs10465591 | 202308344 | 6.342E-27 |
| 1579 | 1 | rs74225911  | 174519824 | 1 | rs10800836 | 202410429 | 6.541E-27 |
| 1580 | 1 | rs74225911  | 174519824 | 1 | rs3767425  | 202413840 | 6.541E-27 |
| 1581 | 1 | rs74225911  | 174519824 | 1 | rs3767421  | 202432160 | 6.541E-27 |
| 1582 | 1 | rs79387712  | 174605087 | 1 | rs930734   | 202318316 | 6.785E-27 |
| 1583 | 1 | rs74225911  | 174519824 | 1 | rs10920392 | 202321123 | 6.992E-27 |
| 1584 | 1 | rs74225911  | 174519824 | 1 | rs6658708  | 202322113 | 6.992E-27 |
| 1585 | 1 | rs78583223  | 174766014 | 1 | rs10159280 | 202394287 | 7.273E-27 |
| 1586 | 1 | rs79387712  | 174605087 | 1 | rs2361453  | 202336314 | 7.485E-27 |
| 1587 | 1 | rs79387712  | 174605087 | 1 | rs6427950  | 202472066 | 8.071E-27 |
| 1588 | 1 | rs79387712  | 174605087 | 1 | rs3753908  | 202511295 | 8.071E-27 |
| 1589 | 1 | rs79387712  | 174605087 | 1 | rs2249811  | 202531741 | 8.071E-27 |
| 1590 | 1 | rs79387712  | 174605087 | 1 | rs925532   | 202533880 | 8.071E-27 |
| 1591 | 1 | rs79387712  | 174605087 | 1 | rs925533   | 202534108 | 8.071E-27 |
| 1592 | 1 | rs79387712  | 174605087 | 1 | rs3767397  | 202534389 | 8.071E-27 |
| 1593 | 1 | rs79387712  | 174605087 | 1 | rs3767395  | 202536140 | 8.071E-27 |
| 1594 | 1 | rs79728530  | 174402618 | 1 | rs930734   | 202318316 | 8.074E-27 |
| 1595 | 1 | rs74761236  | 174619114 | 1 | rs2292489  | 202536848 | 8.128E-27 |
| 1596 | 1 | rs149356780 | 174619156 | 1 | rs2292489  | 202536848 | 8.128E-27 |
| 1597 | 1 | rs146122202 | 174619399 | 1 | rs2292489  | 202536848 | 8.128E-27 |
| 1598 | 1 | rs78172621  | 174624110 | 1 | rs2292489  | 202536848 | 8.128E-27 |
| 1599 | 1 | rs74641552  | 174635904 | 1 | rs2292489  | 202536848 | 8.128E-27 |
| 1600 | 1 | rs115697417 | 174639688 | 1 | rs2292489  | 202536848 | 8.128E-27 |
| 1601 | 1 | rs76311252  | 174640594 | 1 | rs2292489  | 202536848 | 8.128E-27 |
| 1602 | 1 | rs77714297  | 174641617 | 1 | rs2292489  | 202536848 | 8.128E-27 |
| 1603 | 1 | rs75540548  | 174648680 | 1 | rs2292489  | 202536848 | 8.128E-27 |
| 1604 | 1 | rs74225911  | 174519824 | 1 | rs10159280 | 202394287 | 8.6E-27   |
| 1605 | 1 | rs56864802  | 174568929 | 1 | rs10465591 | 202308344 | 8.668E-27 |
| 1606 | 1 | rs60240702  | 174569231 | 1 | rs10465591 | 202308344 | 8.668E-27 |
| 1607 | 1 | rs77531515  | 174572000 | 1 | rs10465591 | 202308344 | 8.668E-27 |

|      |   |             |           |   |            |           |           |
|------|---|-------------|-----------|---|------------|-----------|-----------|
| 1608 | 1 | rs77025642  | 174572929 | 1 | rs10465591 | 202308344 | 8.668E-27 |
| 1609 | 1 | rs79989938  | 174575187 | 1 | rs10465591 | 202308344 | 8.668E-27 |
| 1610 | 1 | rs114289262 | 174587137 | 1 | rs10465591 | 202308344 | 8.72E-27  |
| 1611 | 1 | rs79728530  | 174402618 | 1 | rs2361453  | 202336314 | 8.957E-27 |
| 1612 | 1 | rs79763699  | 174729671 | 1 | rs10465591 | 202308344 | 9.037E-27 |
| 1613 | 1 | rs139161617 | 174732199 | 1 | rs10465591 | 202308344 | 9.037E-27 |
| 1614 | 1 | rs6673649   | 174733562 | 1 | rs10465591 | 202308344 | 9.037E-27 |
| 1615 | 1 | rs75912125  | 174740527 | 1 | rs10465591 | 202308344 | 9.037E-27 |
| 1616 | 1 | rs79728530  | 174402618 | 1 | rs6427950  | 202472066 | 9.701E-27 |
| 1617 | 1 | rs79728530  | 174402618 | 1 | rs3753908  | 202511295 | 9.701E-27 |
| 1618 | 1 | rs79728530  | 174402618 | 1 | rs2249811  | 202531741 | 9.701E-27 |
| 1619 | 1 | rs79728530  | 174402618 | 1 | rs925532   | 202533880 | 9.701E-27 |
| 1620 | 1 | rs79728530  | 174402618 | 1 | rs925533   | 202534108 | 9.701E-27 |
| 1621 | 1 | rs79728530  | 174402618 | 1 | rs3767397  | 202534389 | 9.701E-27 |
| 1622 | 1 | rs79728530  | 174402618 | 1 | rs3767395  | 202536140 | 9.701E-27 |
| 1623 | 1 | rs79387712  | 174605087 | 1 | rs1890875  | 202531366 | 9.932E-27 |
| 1624 | 1 | rs79387712  | 174605087 | 1 | rs10800836 | 202410429 | 1.04E-26  |
| 1625 | 1 | rs79387712  | 174605087 | 1 | rs3767425  | 202413840 | 1.04E-26  |
| 1626 | 1 | rs79387712  | 174605087 | 1 | rs3767421  | 202432160 | 1.04E-26  |
| 1627 | 1 | rs2179108   | 174540727 | 1 | rs2292489  | 202536848 | 1.058E-26 |
| 1628 | 1 | rs138190123 | 174555301 | 1 | rs10465591 | 202308344 | 1.091E-26 |
| 1629 | 1 | rs79387712  | 174605087 | 1 | rs10920392 | 202321123 | 1.114E-26 |
| 1630 | 1 | rs79387712  | 174605087 | 1 | rs6658708  | 202322113 | 1.114E-26 |
| 1631 | 1 | rs79728530  | 174402618 | 1 | rs1890875  | 202531366 | 1.192E-26 |
| 1632 | 1 | rs79728530  | 174402618 | 1 | rs10800836 | 202410429 | 1.248E-26 |
| 1633 | 1 | rs79728530  | 174402618 | 1 | rs3767425  | 202413840 | 1.248E-26 |
| 1634 | 1 | rs79728530  | 174402618 | 1 | rs3767421  | 202432160 | 1.248E-26 |
| 1635 | 1 | rs74761236  | 174619114 | 1 | rs930734   | 202318316 | 1.315E-26 |
| 1636 | 1 | rs149356780 | 174619156 | 1 | rs930734   | 202318316 | 1.315E-26 |
| 1637 | 1 | rs146122202 | 174619399 | 1 | rs930734   | 202318316 | 1.315E-26 |
| 1638 | 1 | rs78172621  | 174624110 | 1 | rs930734   | 202318316 | 1.315E-26 |
| 1639 | 1 | rs74641552  | 174635904 | 1 | rs930734   | 202318316 | 1.315E-26 |
| 1640 | 1 | rs115697417 | 174639688 | 1 | rs930734   | 202318316 | 1.315E-26 |
| 1641 | 1 | rs76311252  | 174640594 | 1 | rs930734   | 202318316 | 1.315E-26 |
| 1642 | 1 | rs77714297  | 174641617 | 1 | rs930734   | 202318316 | 1.315E-26 |
| 1643 | 1 | rs75540548  | 174648680 | 1 | rs930734   | 202318316 | 1.315E-26 |
| 1644 | 1 | rs79728530  | 174402618 | 1 | rs10920392 | 202321123 | 1.334E-26 |
| 1645 | 1 | rs79728530  | 174402618 | 1 | rs6658708  | 202322113 | 1.334E-26 |
| 1646 | 1 | rs6703536   | 174613295 | 1 | rs2292489  | 202536848 | 1.339E-26 |
| 1647 | 1 | rs59190079  | 174594608 | 1 | rs10465591 | 202308344 | 1.364E-26 |
| 1648 | 1 | rs79387712  | 174605087 | 1 | rs10159280 | 202394287 | 1.37E-26  |
| 1649 | 1 | rs74761236  | 174619114 | 1 | rs2361453  | 202336314 | 1.449E-26 |
| 1650 | 1 | rs149356780 | 174619156 | 1 | rs2361453  | 202336314 | 1.449E-26 |
| 1651 | 1 | rs146122202 | 174619399 | 1 | rs2361453  | 202336314 | 1.449E-26 |
| 1652 | 1 | rs78172621  | 174624110 | 1 | rs2361453  | 202336314 | 1.449E-26 |
| 1653 | 1 | rs74641552  | 174635904 | 1 | rs2361453  | 202336314 | 1.449E-26 |
| 1654 | 1 | rs115697417 | 174639688 | 1 | rs2361453  | 202336314 | 1.449E-26 |
| 1655 | 1 | rs76311252  | 174640594 | 1 | rs2361453  | 202336314 | 1.449E-26 |
| 1656 | 1 | rs77714297  | 174641617 | 1 | rs2361453  | 202336314 | 1.449E-26 |
| 1657 | 1 | rs75540548  | 174648680 | 1 | rs2361453  | 202336314 | 1.449E-26 |
| 1658 | 1 | rs16847018  | 174419672 | 1 | rs10465591 | 202308344 | 1.464E-26 |
| 1659 | 1 | rs16847025  | 174425858 | 1 | rs10465591 | 202308344 | 1.464E-26 |

|      |   |             |           |   |            |           |           |
|------|---|-------------|-----------|---|------------|-----------|-----------|
| 1660 | 1 | rs75368101  | 174447029 | 1 | rs10465591 | 202308344 | 1.464E-26 |
| 1661 | 1 | rs74367921  | 174457505 | 1 | rs10465591 | 202308344 | 1.464E-26 |
| 1662 | 1 | rs141587031 | 174458302 | 1 | rs10465591 | 202308344 | 1.464E-26 |
| 1663 | 1 | rs75222047  | 174460751 | 1 | rs10465591 | 202308344 | 1.464E-26 |
| 1664 | 1 | rs77684114  | 174461386 | 1 | rs10465591 | 202308344 | 1.464E-26 |
| 1665 | 1 | rs79170014  | 174462952 | 1 | rs10465591 | 202308344 | 1.464E-26 |
| 1666 | 1 | rs2901819   | 174467697 | 1 | rs10465591 | 202308344 | 1.464E-26 |
| 1667 | 1 | rs58063264  | 174468442 | 1 | rs10465591 | 202308344 | 1.464E-26 |
| 1668 | 1 | rs41397546  | 174476714 | 1 | rs10465591 | 202308344 | 1.464E-26 |
| 1669 | 1 | rs16847121  | 174482433 | 1 | rs10465591 | 202308344 | 1.464E-26 |
| 1670 | 1 | rs76886469  | 174488738 | 1 | rs10465591 | 202308344 | 1.464E-26 |
| 1671 | 1 | rs57132183  | 174492721 | 1 | rs10465591 | 202308344 | 1.464E-26 |
| 1672 | 1 | rs74651209  | 174501445 | 1 | rs10465591 | 202308344 | 1.464E-26 |
| 1673 | 1 | rs59262554  | 174504233 | 1 | rs10465591 | 202308344 | 1.464E-26 |
| 1674 | 1 | rs7547843   | 174507529 | 1 | rs10465591 | 202308344 | 1.464E-26 |
| 1675 | 1 | rs142531097 | 174512268 | 1 | rs10465591 | 202308344 | 1.464E-26 |
| 1676 | 1 | rs146786952 | 174514535 | 1 | rs10465591 | 202308344 | 1.464E-26 |
| 1677 | 1 | rs41266052  | 174517443 | 1 | rs10465591 | 202308344 | 1.464E-26 |
| 1678 | 1 | rs57898822  | 174531784 | 1 | rs10465591 | 202308344 | 1.464E-26 |
| 1679 | 1 | rs75120198  | 174535022 | 1 | rs10465591 | 202308344 | 1.464E-26 |
| 1680 | 1 | rs75134210  | 174536483 | 1 | rs10465591 | 202308344 | 1.464E-26 |
| 1681 | 1 | rs2179109   | 174540259 | 1 | rs10465591 | 202308344 | 1.464E-26 |
| 1682 | 1 | rs16847206  | 174541307 | 1 | rs10465591 | 202308344 | 1.464E-26 |
| 1683 | 1 | rs148694367 | 174544318 | 1 | rs10465591 | 202308344 | 1.464E-26 |
| 1684 | 1 | rs143179310 | 174545451 | 1 | rs10465591 | 202308344 | 1.464E-26 |
| 1685 | 1 | rs74761236  | 174619114 | 1 | rs6427950  | 202472066 | 1.567E-26 |
| 1686 | 1 | rs74761236  | 174619114 | 1 | rs3753908  | 202511295 | 1.567E-26 |
| 1687 | 1 | rs74761236  | 174619114 | 1 | rs2249811  | 202531741 | 1.567E-26 |
| 1688 | 1 | rs74761236  | 174619114 | 1 | rs925532   | 202533880 | 1.567E-26 |
| 1689 | 1 | rs74761236  | 174619114 | 1 | rs925533   | 202534108 | 1.567E-26 |
| 1690 | 1 | rs74761236  | 174619114 | 1 | rs3767397  | 202534389 | 1.567E-26 |
| 1691 | 1 | rs74761236  | 174619114 | 1 | rs3767395  | 202536140 | 1.567E-26 |
| 1692 | 1 | rs149356780 | 174619156 | 1 | rs6427950  | 202472066 | 1.567E-26 |
| 1693 | 1 | rs149356780 | 174619156 | 1 | rs3753908  | 202511295 | 1.567E-26 |
| 1694 | 1 | rs149356780 | 174619156 | 1 | rs2249811  | 202531741 | 1.567E-26 |
| 1695 | 1 | rs149356780 | 174619156 | 1 | rs925532   | 202533880 | 1.567E-26 |
| 1696 | 1 | rs149356780 | 174619156 | 1 | rs925533   | 202534108 | 1.567E-26 |
| 1697 | 1 | rs149356780 | 174619156 | 1 | rs3767397  | 202534389 | 1.567E-26 |
| 1698 | 1 | rs149356780 | 174619156 | 1 | rs3767395  | 202536140 | 1.567E-26 |
| 1699 | 1 | rs146122202 | 174619399 | 1 | rs6427950  | 202472066 | 1.567E-26 |
| 1700 | 1 | rs146122202 | 174619399 | 1 | rs3753908  | 202511295 | 1.567E-26 |
| 1701 | 1 | rs146122202 | 174619399 | 1 | rs2249811  | 202531741 | 1.567E-26 |
| 1702 | 1 | rs146122202 | 174619399 | 1 | rs925532   | 202533880 | 1.567E-26 |
| 1703 | 1 | rs146122202 | 174619399 | 1 | rs925533   | 202534108 | 1.567E-26 |
| 1704 | 1 | rs146122202 | 174619399 | 1 | rs3767397  | 202534389 | 1.567E-26 |
| 1705 | 1 | rs146122202 | 174619399 | 1 | rs3767395  | 202536140 | 1.567E-26 |
| 1706 | 1 | rs78172621  | 174624110 | 1 | rs6427950  | 202472066 | 1.567E-26 |
| 1707 | 1 | rs78172621  | 174624110 | 1 | rs3753908  | 202511295 | 1.567E-26 |
| 1708 | 1 | rs78172621  | 174624110 | 1 | rs2249811  | 202531741 | 1.567E-26 |
| 1709 | 1 | rs78172621  | 174624110 | 1 | rs925532   | 202533880 | 1.567E-26 |
| 1710 | 1 | rs78172621  | 174624110 | 1 | rs925533   | 202534108 | 1.567E-26 |
| 1711 | 1 | rs78172621  | 174624110 | 1 | rs3767397  | 202534389 | 1.567E-26 |

|      |   |             |           |   |            |           |           |
|------|---|-------------|-----------|---|------------|-----------|-----------|
| 1712 | 1 | rs78172621  | 174624110 | 1 | rs3767395  | 202536140 | 1.567E-26 |
| 1713 | 1 | rs74641552  | 174635904 | 1 | rs6427950  | 202472066 | 1.567E-26 |
| 1714 | 1 | rs74641552  | 174635904 | 1 | rs3753908  | 202511295 | 1.567E-26 |
| 1715 | 1 | rs74641552  | 174635904 | 1 | rs2249811  | 202531741 | 1.567E-26 |
| 1716 | 1 | rs74641552  | 174635904 | 1 | rs925532   | 202533880 | 1.567E-26 |
| 1717 | 1 | rs74641552  | 174635904 | 1 | rs925533   | 202534108 | 1.567E-26 |
| 1718 | 1 | rs74641552  | 174635904 | 1 | rs3767397  | 202534389 | 1.567E-26 |
| 1719 | 1 | rs74641552  | 174635904 | 1 | rs3767395  | 202536140 | 1.567E-26 |
| 1720 | 1 | rs115697417 | 174639688 | 1 | rs6427950  | 202472066 | 1.567E-26 |
| 1721 | 1 | rs115697417 | 174639688 | 1 | rs3753908  | 202511295 | 1.567E-26 |
| 1722 | 1 | rs115697417 | 174639688 | 1 | rs2249811  | 202531741 | 1.567E-26 |
| 1723 | 1 | rs115697417 | 174639688 | 1 | rs925532   | 202533880 | 1.567E-26 |
| 1724 | 1 | rs115697417 | 174639688 | 1 | rs925533   | 202534108 | 1.567E-26 |
| 1725 | 1 | rs115697417 | 174639688 | 1 | rs3767397  | 202534389 | 1.567E-26 |
| 1726 | 1 | rs115697417 | 174639688 | 1 | rs3767395  | 202536140 | 1.567E-26 |
| 1727 | 1 | rs76311252  | 174640594 | 1 | rs6427950  | 202472066 | 1.567E-26 |
| 1728 | 1 | rs76311252  | 174640594 | 1 | rs3753908  | 202511295 | 1.567E-26 |
| 1729 | 1 | rs76311252  | 174640594 | 1 | rs2249811  | 202531741 | 1.567E-26 |
| 1730 | 1 | rs76311252  | 174640594 | 1 | rs925532   | 202533880 | 1.567E-26 |
| 1731 | 1 | rs76311252  | 174640594 | 1 | rs925533   | 202534108 | 1.567E-26 |
| 1732 | 1 | rs76311252  | 174640594 | 1 | rs3767397  | 202534389 | 1.567E-26 |
| 1733 | 1 | rs76311252  | 174640594 | 1 | rs3767395  | 202536140 | 1.567E-26 |
| 1734 | 1 | rs77714297  | 174641617 | 1 | rs6427950  | 202472066 | 1.567E-26 |
| 1735 | 1 | rs77714297  | 174641617 | 1 | rs3753908  | 202511295 | 1.567E-26 |
| 1736 | 1 | rs77714297  | 174641617 | 1 | rs2249811  | 202531741 | 1.567E-26 |
| 1737 | 1 | rs77714297  | 174641617 | 1 | rs925532   | 202533880 | 1.567E-26 |
| 1738 | 1 | rs77714297  | 174641617 | 1 | rs925533   | 202534108 | 1.567E-26 |
| 1739 | 1 | rs77714297  | 174641617 | 1 | rs3767397  | 202534389 | 1.567E-26 |
| 1740 | 1 | rs77714297  | 174641617 | 1 | rs3767395  | 202536140 | 1.567E-26 |
| 1741 | 1 | rs75540548  | 174648680 | 1 | rs6427950  | 202472066 | 1.567E-26 |
| 1742 | 1 | rs75540548  | 174648680 | 1 | rs3753908  | 202511295 | 1.567E-26 |
| 1743 | 1 | rs75540548  | 174648680 | 1 | rs2249811  | 202531741 | 1.567E-26 |
| 1744 | 1 | rs75540548  | 174648680 | 1 | rs925532   | 202533880 | 1.567E-26 |
| 1745 | 1 | rs75540548  | 174648680 | 1 | rs925533   | 202534108 | 1.567E-26 |
| 1746 | 1 | rs75540548  | 174648680 | 1 | rs3767397  | 202534389 | 1.567E-26 |
| 1747 | 1 | rs75540548  | 174648680 | 1 | rs3767395  | 202536140 | 1.567E-26 |
| 1748 | 1 | rs79728530  | 174402618 | 1 | rs10159280 | 202394287 | 1.637E-26 |
| 1749 | 1 | rs2179108   | 174540727 | 1 | rs930734   | 202318316 | 1.651E-26 |
| 1750 | 1 | rs78583223  | 174766014 | 1 | rs10465591 | 202308344 | 1.769E-26 |
| 1751 | 1 | rs2179108   | 174540727 | 1 | rs2361453  | 202336314 | 1.804E-26 |
| 1752 | 1 | rs146397359 | 174816494 | 1 | rs6427950  | 202472066 | 1.841E-26 |
| 1753 | 1 | rs146397359 | 174816494 | 1 | rs3753908  | 202511295 | 1.841E-26 |
| 1754 | 1 | rs146397359 | 174816494 | 1 | rs2249811  | 202531741 | 1.841E-26 |
| 1755 | 1 | rs146397359 | 174816494 | 1 | rs925532   | 202533880 | 1.841E-26 |
| 1756 | 1 | rs146397359 | 174816494 | 1 | rs925533   | 202534108 | 1.841E-26 |
| 1757 | 1 | rs146397359 | 174816494 | 1 | rs3767397  | 202534389 | 1.841E-26 |
| 1758 | 1 | rs146397359 | 174816494 | 1 | rs3767395  | 202536140 | 1.841E-26 |
| 1759 | 1 | rs2179108   | 174540727 | 1 | rs6427950  | 202472066 | 1.897E-26 |
| 1760 | 1 | rs2179108   | 174540727 | 1 | rs3753908  | 202511295 | 1.897E-26 |
| 1761 | 1 | rs2179108   | 174540727 | 1 | rs2249811  | 202531741 | 1.897E-26 |
| 1762 | 1 | rs2179108   | 174540727 | 1 | rs925532   | 202533880 | 1.897E-26 |
| 1763 | 1 | rs2179108   | 174540727 | 1 | rs925533   | 202534108 | 1.897E-26 |

|      |   |             |           |   |            |           |           |
|------|---|-------------|-----------|---|------------|-----------|-----------|
| 1764 | 1 | rs2179108   | 174540727 | 1 | rs3767397  | 202534389 | 1.897E-26 |
| 1765 | 1 | rs2179108   | 174540727 | 1 | rs3767395  | 202536140 | 1.897E-26 |
| 1766 | 1 | rs74761236  | 174619114 | 1 | rs1890875  | 202531366 | 1.926E-26 |
| 1767 | 1 | rs149356780 | 174619156 | 1 | rs1890875  | 202531366 | 1.926E-26 |
| 1768 | 1 | rs146122202 | 174619399 | 1 | rs1890875  | 202531366 | 1.926E-26 |
| 1769 | 1 | rs78172621  | 174624110 | 1 | rs1890875  | 202531366 | 1.926E-26 |
| 1770 | 1 | rs74641552  | 174635904 | 1 | rs1890875  | 202531366 | 1.926E-26 |
| 1771 | 1 | rs115697417 | 174639688 | 1 | rs1890875  | 202531366 | 1.926E-26 |
| 1772 | 1 | rs76311252  | 174640594 | 1 | rs1890875  | 202531366 | 1.926E-26 |
| 1773 | 1 | rs77714297  | 174641617 | 1 | rs1890875  | 202531366 | 1.926E-26 |
| 1774 | 1 | rs75540548  | 174648680 | 1 | rs1890875  | 202531366 | 1.926E-26 |
| 1775 | 1 | rs74761236  | 174619114 | 1 | rs10800836 | 202410429 | 2.019E-26 |
| 1776 | 1 | rs74761236  | 174619114 | 1 | rs3767425  | 202413840 | 2.019E-26 |
| 1777 | 1 | rs74761236  | 174619114 | 1 | rs3767421  | 202432160 | 2.019E-26 |
| 1778 | 1 | rs149356780 | 174619156 | 1 | rs10800836 | 202410429 | 2.019E-26 |
| 1779 | 1 | rs149356780 | 174619156 | 1 | rs3767425  | 202413840 | 2.019E-26 |
| 1780 | 1 | rs149356780 | 174619156 | 1 | rs3767421  | 202432160 | 2.019E-26 |
| 1781 | 1 | rs146122202 | 174619399 | 1 | rs10800836 | 202410429 | 2.019E-26 |
| 1782 | 1 | rs146122202 | 174619399 | 1 | rs3767425  | 202413840 | 2.019E-26 |
| 1783 | 1 | rs146122202 | 174619399 | 1 | rs3767421  | 202432160 | 2.019E-26 |
| 1784 | 1 | rs78172621  | 174624110 | 1 | rs10800836 | 202410429 | 2.019E-26 |
| 1785 | 1 | rs78172621  | 174624110 | 1 | rs3767425  | 202413840 | 2.019E-26 |
| 1786 | 1 | rs78172621  | 174624110 | 1 | rs3767421  | 202432160 | 2.019E-26 |
| 1787 | 1 | rs74641552  | 174635904 | 1 | rs10800836 | 202410429 | 2.019E-26 |
| 1788 | 1 | rs74641552  | 174635904 | 1 | rs3767425  | 202413840 | 2.019E-26 |
| 1789 | 1 | rs74641552  | 174635904 | 1 | rs3767421  | 202432160 | 2.019E-26 |
| 1790 | 1 | rs115697417 | 174639688 | 1 | rs10800836 | 202410429 | 2.019E-26 |
| 1791 | 1 | rs115697417 | 174639688 | 1 | rs3767425  | 202413840 | 2.019E-26 |
| 1792 | 1 | rs115697417 | 174639688 | 1 | rs3767421  | 202432160 | 2.019E-26 |
| 1793 | 1 | rs76311252  | 174640594 | 1 | rs10800836 | 202410429 | 2.019E-26 |
| 1794 | 1 | rs76311252  | 174640594 | 1 | rs3767425  | 202413840 | 2.019E-26 |
| 1795 | 1 | rs76311252  | 174640594 | 1 | rs3767421  | 202432160 | 2.019E-26 |
| 1796 | 1 | rs77714297  | 174641617 | 1 | rs10800836 | 202410429 | 2.019E-26 |
| 1797 | 1 | rs77714297  | 174641617 | 1 | rs3767425  | 202413840 | 2.019E-26 |
| 1798 | 1 | rs77714297  | 174641617 | 1 | rs3767421  | 202432160 | 2.019E-26 |
| 1799 | 1 | rs75540548  | 174648680 | 1 | rs10800836 | 202410429 | 2.019E-26 |
| 1800 | 1 | rs75540548  | 174648680 | 1 | rs3767425  | 202413840 | 2.019E-26 |
| 1801 | 1 | rs75540548  | 174648680 | 1 | rs3767421  | 202432160 | 2.019E-26 |
| 1802 | 1 | rs74225911  | 174519824 | 1 | rs10465591 | 202308344 | 2.102E-26 |
| 1803 | 1 | rs6703536   | 174613295 | 1 | rs930734   | 202318316 | 2.151E-26 |
| 1804 | 1 | rs74761236  | 174619114 | 1 | rs10920392 | 202321123 | 2.157E-26 |
| 1805 | 1 | rs74761236  | 174619114 | 1 | rs6658708  | 202322113 | 2.157E-26 |
| 1806 | 1 | rs149356780 | 174619156 | 1 | rs10920392 | 202321123 | 2.157E-26 |
| 1807 | 1 | rs149356780 | 174619156 | 1 | rs6658708  | 202322113 | 2.157E-26 |
| 1808 | 1 | rs146122202 | 174619399 | 1 | rs10920392 | 202321123 | 2.157E-26 |
| 1809 | 1 | rs146122202 | 174619399 | 1 | rs6658708  | 202322113 | 2.157E-26 |
| 1810 | 1 | rs78172621  | 174624110 | 1 | rs10920392 | 202321123 | 2.157E-26 |
| 1811 | 1 | rs78172621  | 174624110 | 1 | rs6658708  | 202322113 | 2.157E-26 |
| 1812 | 1 | rs74641552  | 174635904 | 1 | rs10920392 | 202321123 | 2.157E-26 |
| 1813 | 1 | rs74641552  | 174635904 | 1 | rs6658708  | 202322113 | 2.157E-26 |
| 1814 | 1 | rs115697417 | 174639688 | 1 | rs10920392 | 202321123 | 2.157E-26 |
| 1815 | 1 | rs115697417 | 174639688 | 1 | rs6658708  | 202322113 | 2.157E-26 |

|      |   |             |           |   |            |           |           |
|------|---|-------------|-----------|---|------------|-----------|-----------|
| 1816 | 1 | rs76311252  | 174640594 | 1 | rs10920392 | 202321123 | 2.157E-26 |
| 1817 | 1 | rs76311252  | 174640594 | 1 | rs6658708  | 202322113 | 2.157E-26 |
| 1818 | 1 | rs77714297  | 174641617 | 1 | rs10920392 | 202321123 | 2.157E-26 |
| 1819 | 1 | rs77714297  | 174641617 | 1 | rs6658708  | 202322113 | 2.157E-26 |
| 1820 | 1 | rs75540548  | 174648680 | 1 | rs10920392 | 202321123 | 2.157E-26 |
| 1821 | 1 | rs75540548  | 174648680 | 1 | rs6658708  | 202322113 | 2.157E-26 |
| 1822 | 1 | rs2179108   | 174540727 | 1 | rs1890875  | 202531366 | 2.3E-26   |
| 1823 | 1 | rs6703536   | 174613295 | 1 | rs2361453  | 202336314 | 2.371E-26 |
| 1824 | 1 | rs2179108   | 174540727 | 1 | rs10800836 | 202410429 | 2.399E-26 |
| 1825 | 1 | rs2179108   | 174540727 | 1 | rs3767425  | 202413840 | 2.399E-26 |
| 1826 | 1 | rs2179108   | 174540727 | 1 | rs3767421  | 202432160 | 2.399E-26 |
| 1827 | 1 | rs6703536   | 174613295 | 1 | rs6427950  | 202472066 | 2.566E-26 |
| 1828 | 1 | rs6703536   | 174613295 | 1 | rs3753908  | 202511295 | 2.566E-26 |
| 1829 | 1 | rs6703536   | 174613295 | 1 | rs2249811  | 202531741 | 2.566E-26 |
| 1830 | 1 | rs6703536   | 174613295 | 1 | rs925532   | 202533880 | 2.566E-26 |
| 1831 | 1 | rs6703536   | 174613295 | 1 | rs925533   | 202534108 | 2.566E-26 |
| 1832 | 1 | rs6703536   | 174613295 | 1 | rs3767397  | 202534389 | 2.566E-26 |
| 1833 | 1 | rs6703536   | 174613295 | 1 | rs3767395  | 202536140 | 2.566E-26 |
| 1834 | 1 | rs2179108   | 174540727 | 1 | rs10920392 | 202321123 | 2.584E-26 |
| 1835 | 1 | rs2179108   | 174540727 | 1 | rs6658708  | 202322113 | 2.584E-26 |
| 1836 | 1 | rs74761236  | 174619114 | 1 | rs10159280 | 202394287 | 2.649E-26 |
| 1837 | 1 | rs149356780 | 174619156 | 1 | rs10159280 | 202394287 | 2.649E-26 |
| 1838 | 1 | rs146122202 | 174619399 | 1 | rs10159280 | 202394287 | 2.649E-26 |
| 1839 | 1 | rs78172621  | 174624110 | 1 | rs10159280 | 202394287 | 2.649E-26 |
| 1840 | 1 | rs74641552  | 174635904 | 1 | rs10159280 | 202394287 | 2.649E-26 |
| 1841 | 1 | rs115697417 | 174639688 | 1 | rs10159280 | 202394287 | 2.649E-26 |
| 1842 | 1 | rs76311252  | 174640594 | 1 | rs10159280 | 202394287 | 2.649E-26 |
| 1843 | 1 | rs77714297  | 174641617 | 1 | rs10159280 | 202394287 | 2.649E-26 |
| 1844 | 1 | rs75540548  | 174648680 | 1 | rs10159280 | 202394287 | 2.649E-26 |
| 1845 | 1 | rs2179108   | 174540727 | 1 | rs10159280 | 202394287 | 3.132E-26 |
| 1846 | 1 | rs6703536   | 174613295 | 1 | rs1890875  | 202531366 | 3.151E-26 |
| 1847 | 1 | rs6703536   | 174613295 | 1 | rs10800836 | 202410429 | 3.298E-26 |
| 1848 | 1 | rs6703536   | 174613295 | 1 | rs3767425  | 202413840 | 3.298E-26 |
| 1849 | 1 | rs6703536   | 174613295 | 1 | rs3767421  | 202432160 | 3.298E-26 |
| 1850 | 1 | rs79387712  | 174605087 | 1 | rs10465591 | 202308344 | 3.336E-26 |
| 1851 | 1 | rs6703536   | 174613295 | 1 | rs10920392 | 202321123 | 3.521E-26 |
| 1852 | 1 | rs6703536   | 174613295 | 1 | rs6658708  | 202322113 | 3.521E-26 |
| 1853 | 1 | rs187157646 | 174643586 | 1 | rs930734   | 202318316 | 3.724E-26 |
| 1854 | 1 | rs12404552  | 202566780 | 3 | rs6791363  | 85073170  | 3.947E-26 |
| 1855 | 1 | rs79728530  | 174402618 | 1 | rs10465591 | 202308344 | 3.989E-26 |
| 1856 | 1 | rs187157646 | 174643586 | 1 | rs2361453  | 202336314 | 4.099E-26 |
| 1857 | 1 | rs6703536   | 174613295 | 1 | rs10159280 | 202394287 | 4.32E-26  |
| 1858 | 1 | rs187157646 | 174643586 | 1 | rs2292489  | 202536848 | 4.718E-26 |
| 1859 | 1 | rs4515855   | 174588920 | 1 | rs2292489  | 202536848 | 5.783E-26 |
| 1860 | 1 | rs187157646 | 174643586 | 1 | rs10920392 | 202321123 | 6.144E-26 |
| 1861 | 1 | rs187157646 | 174643586 | 1 | rs6658708  | 202322113 | 6.144E-26 |
| 1862 | 1 | rs7543502   | 174653701 | 1 | rs705742   | 202461982 | 6.454E-26 |
| 1863 | 1 | rs74761236  | 174619114 | 1 | rs10465591 | 202308344 | 6.466E-26 |
| 1864 | 1 | rs149356780 | 174619156 | 1 | rs10465591 | 202308344 | 6.466E-26 |
| 1865 | 1 | rs146122202 | 174619399 | 1 | rs10465591 | 202308344 | 6.466E-26 |
| 1866 | 1 | rs78172621  | 174624110 | 1 | rs10465591 | 202308344 | 6.466E-26 |
| 1867 | 1 | rs74641552  | 174635904 | 1 | rs10465591 | 202308344 | 6.466E-26 |



|      |   |             |           |   |            |           |           |
|------|---|-------------|-----------|---|------------|-----------|-----------|
| 1868 | 1 | rs115697417 | 174639688 | 1 | rs10465591 | 202308344 | 6.466E-26 |
| 1869 | 1 | rs76311252  | 174640594 | 1 | rs10465591 | 202308344 | 6.466E-26 |
| 1870 | 1 | rs77714297  | 174641617 | 1 | rs10465591 | 202308344 | 6.466E-26 |
| 1871 | 1 | rs75540548  | 174648680 | 1 | rs10465591 | 202308344 | 6.466E-26 |
| 1872 | 1 | rs2179108   | 174540727 | 1 | rs10465591 | 202308344 | 6.993E-26 |
| 1873 | 1 | rs187157646 | 174643586 | 1 | rs10159280 | 202394287 | 7.565E-26 |
| 1874 | 1 | rs146397359 | 174816494 | 1 | rs1890875  | 202531366 | 7.923E-26 |
| 1875 | 1 | rs187157646 | 174643586 | 1 | rs10800836 | 202410429 | 9.211E-26 |
| 1876 | 1 | rs187157646 | 174643586 | 1 | rs3767425  | 202413840 | 9.211E-26 |
| 1877 | 1 | rs187157646 | 174643586 | 1 | rs3767421  | 202432160 | 9.211E-26 |
| 1878 | 1 | rs187157646 | 174643586 | 1 | rs6427950  | 202472066 | 9.211E-26 |
| 1879 | 1 | rs187157646 | 174643586 | 1 | rs3753908  | 202511295 | 9.211E-26 |
| 1880 | 1 | rs187157646 | 174643586 | 1 | rs2249811  | 202531741 | 9.211E-26 |
| 1881 | 1 | rs187157646 | 174643586 | 1 | rs925532   | 202533880 | 9.211E-26 |
| 1882 | 1 | rs187157646 | 174643586 | 1 | rs925533   | 202534108 | 9.211E-26 |
| 1883 | 1 | rs187157646 | 174643586 | 1 | rs3767397  | 202534389 | 9.211E-26 |
| 1884 | 1 | rs187157646 | 174643586 | 1 | rs3767395  | 202536140 | 9.211E-26 |
| 1885 | 1 | rs79893841  | 174622255 | 1 | rs2292489  | 202536848 | 9.318E-26 |
| 1886 | 1 | rs4515855   | 174588920 | 1 | rs930734   | 202318316 | 9.326E-26 |
| 1887 | 1 | rs4515855   | 174588920 | 1 | rs2361453  | 202336314 | 1.013E-25 |
| 1888 | 1 | rs6703536   | 174613295 | 1 | rs10465591 | 202308344 | 1.046E-25 |
| 1889 | 1 | rs75461537  | 174869593 | 1 | rs705742   | 202461982 | 1.084E-25 |
| 1890 | 1 | rs4515855   | 174588920 | 1 | rs6427950  | 202472066 | 1.117E-25 |
| 1891 | 1 | rs4515855   | 174588920 | 1 | rs3753908  | 202511295 | 1.117E-25 |
| 1892 | 1 | rs4515855   | 174588920 | 1 | rs2249811  | 202531741 | 1.117E-25 |
| 1893 | 1 | rs4515855   | 174588920 | 1 | rs925532   | 202533880 | 1.117E-25 |
| 1894 | 1 | rs4515855   | 174588920 | 1 | rs925533   | 202534108 | 1.117E-25 |
| 1895 | 1 | rs4515855   | 174588920 | 1 | rs3767397  | 202534389 | 1.117E-25 |
| 1896 | 1 | rs4515855   | 174588920 | 1 | rs3767395  | 202536140 | 1.117E-25 |
| 1897 | 1 | rs187157646 | 174643586 | 1 | rs1890875  | 202531366 | 1.134E-25 |
| 1898 | 1 | rs146397359 | 174816494 | 1 | rs10800836 | 202410429 | 1.276E-25 |
| 1899 | 1 | rs146397359 | 174816494 | 1 | rs3767425  | 202413840 | 1.276E-25 |
| 1900 | 1 | rs146397359 | 174816494 | 1 | rs3767421  | 202432160 | 1.276E-25 |
| 1901 | 1 | rs2362941   | 202550547 | 5 | rs265973   | 174860699 | 1.303E-25 |
| 1902 | 1 | rs4515855   | 174588920 | 1 | rs1890875  | 202531366 | 1.374E-25 |
| 1903 | 1 | rs12404552  | 202566780 | 3 | rs9876378  | 85071278  | 1.422E-25 |
| 1904 | 1 | rs4515855   | 174588920 | 1 | rs10800836 | 202410429 | 1.433E-25 |
| 1905 | 1 | rs4515855   | 174588920 | 1 | rs3767425  | 202413840 | 1.433E-25 |
| 1906 | 1 | rs4515855   | 174588920 | 1 | rs3767421  | 202432160 | 1.433E-25 |
| 1907 | 1 | rs79893841  | 174622255 | 1 | rs930734   | 202318316 | 1.495E-25 |
| 1908 | 1 | rs4515855   | 174588920 | 1 | rs10920392 | 202321123 | 1.513E-25 |
| 1909 | 1 | rs4515855   | 174588920 | 1 | rs6658708  | 202322113 | 1.513E-25 |
| 1910 | 1 | rs79893841  | 174622255 | 1 | rs2361453  | 202336314 | 1.643E-25 |
| 1911 | 1 | rs79893841  | 174622255 | 1 | rs6427950  | 202472066 | 1.779E-25 |
| 1912 | 1 | rs79893841  | 174622255 | 1 | rs3753908  | 202511295 | 1.779E-25 |
| 1913 | 1 | rs79893841  | 174622255 | 1 | rs2249811  | 202531741 | 1.779E-25 |
| 1914 | 1 | rs79893841  | 174622255 | 1 | rs925532   | 202533880 | 1.779E-25 |
| 1915 | 1 | rs79893841  | 174622255 | 1 | rs925533   | 202534108 | 1.779E-25 |
| 1916 | 1 | rs79893841  | 174622255 | 1 | rs3767397  | 202534389 | 1.779E-25 |
| 1917 | 1 | rs79893841  | 174622255 | 1 | rs3767395  | 202536140 | 1.779E-25 |
| 1918 | 1 | rs4515855   | 174588920 | 1 | rs10159280 | 202394287 | 1.86E-25  |
| 1919 | 1 | rs187157646 | 174643586 | 1 | rs10465591 | 202308344 | 1.888E-25 |

|      |   |             |           |   |             |           |           |
|------|---|-------------|-----------|---|-------------|-----------|-----------|
| 1920 | 1 | rs4950778   | 202431464 | 3 | rs115821677 | 86219871  | 2.171E-25 |
| 1921 | 1 | rs4950779   | 202542202 | 3 | rs115821677 | 86219871  | 2.171E-25 |
| 1922 | 1 | rs79893841  | 174622255 | 1 | rs1890875   | 202531366 | 2.18E-25  |
| 1923 | 1 | rs79893841  | 174622255 | 1 | rs10800836  | 202410429 | 2.281E-25 |
| 1924 | 1 | rs79893841  | 174622255 | 1 | rs3767425   | 202413840 | 2.281E-25 |
| 1925 | 1 | rs79893841  | 174622255 | 1 | rs3767421   | 202432160 | 2.281E-25 |
| 1926 | 1 | rs79893841  | 174622255 | 1 | rs10920392  | 202321123 | 2.432E-25 |
| 1927 | 1 | rs79893841  | 174622255 | 1 | rs6658708   | 202322113 | 2.432E-25 |
| 1928 | 1 | rs146397359 | 174816494 | 1 | rs2292489   | 202536848 | 2.907E-25 |
| 1929 | 1 | rs79893841  | 174622255 | 1 | rs10159280  | 202394287 | 2.977E-25 |
| 1930 | 1 | rs967677    | 202548822 | 4 | rs6853599   | 3445610   | 3.03E-25  |
| 1931 | 1 | rs6700434   | 174868328 | 1 | rs705742    | 202461982 | 3.358E-25 |
| 1932 | 1 | rs4515855   | 174588920 | 1 | rs10465591  | 202308344 | 4.527E-25 |
| 1933 | 1 | rs77551912  | 174873951 | 1 | rs705742    | 202461982 | 8.204E-25 |
| 1934 | 1 | rs2362941   | 202550547 | 4 | rs6853599   | 3445610   | 2.257E-24 |
| 1935 | 1 | rs967677    | 202548822 | 3 | rs12632810  | 10824072  | 2.487E-24 |
| 1936 | 1 | rs967677    | 202548822 | 3 | rs12632152  | 10832600  | 2.537E-24 |
| 1937 | 1 | rs967677    | 202548822 | 3 | rs2017887   | 10825694  | 2.57E-24  |
| 1938 | 1 | rs747640    | 202551071 | 4 | rs45579537  | 3446284   | 4.112E-24 |
| 1939 | 1 | rs146397359 | 174816494 | 1 | rs10920392  | 202321123 | 5.837E-24 |
| 1940 | 1 | rs146397359 | 174816494 | 1 | rs6658708   | 202322113 | 5.837E-24 |
| 1941 | 1 | rs182548672 | 202440828 | 3 | rs73141547  | 85657125  | 8.361E-24 |
| 1942 | 1 | rs77155802  | 202450864 | 3 | rs73141547  | 85657125  | 8.361E-24 |
| 1943 | 1 | rs146397359 | 174816494 | 1 | rs10465591  | 202308344 | 9.672E-24 |
| 1944 | 1 | rs146397359 | 174816494 | 1 | rs2361453   | 202336314 | 1.049E-23 |
| 1945 | 1 | rs76616345  | 174766778 | 1 | rs705742    | 202461982 | 1.102E-23 |
| 1946 | 1 | rs2741849   | 202373394 | 4 | rs283420    | 100288975 | 1.361E-23 |
| 1947 | 1 | rs747640    | 202551071 | 4 | rs17805201  | 3446513   | 1.507E-23 |
| 1948 | 1 | rs146397359 | 174816494 | 1 | rs10159280  | 202394287 | 1.983E-23 |
| 1949 | 1 | rs146397359 | 174816494 | 1 | rs930734    | 202318316 | 2.308E-23 |
| 1950 | 1 | rs705742    | 202461982 | 3 | rs9288991   | 113855761 | 4.533E-23 |
| 1951 | 1 | rs705742    | 202461982 | 3 | rs57309847  | 113856802 | 4.533E-23 |
| 1952 | 1 | rs705742    | 202461982 | 3 | rs9859762   | 113857118 | 4.533E-23 |
| 1953 | 1 | rs12404552  | 202566780 | 3 | rs1691471   | 85011013  | 6.085E-23 |
| 1954 | 1 | rs705742    | 202461982 | 3 | rs4592996   | 113850489 | 6.213E-23 |
| 1955 | 1 | rs705742    | 202461982 | 3 | rs2654754   | 113855796 | 6.213E-23 |
| 1956 | 1 | rs705742    | 202461982 | 3 | rs9837524   | 113856611 | 6.274E-23 |
| 1957 | 1 | rs2741849   | 202373394 | 4 | rs283416    | 100271356 | 1.161E-22 |
| 1958 | 1 | rs2741849   | 202373394 | 4 | rs166892    | 100282765 | 1.161E-22 |
| 1959 | 1 | rs2741849   | 202373394 | 4 | rs1229852   | 100283665 | 1.161E-22 |
| 1960 | 1 | rs2741849   | 202373394 | 4 | rs283422    | 100287182 | 1.161E-22 |
| 1961 | 1 | rs2741849   | 202373394 | 4 | rs283421    | 100287996 | 1.161E-22 |
| 1962 | 1 | rs2741849   | 202373394 | 4 | rs283418    | 100292187 | 1.161E-22 |
| 1963 | 1 | rs705742    | 202461982 | 3 | rs12490922  | 113856881 | 1.165E-22 |
| 1964 | 1 | rs705742    | 202461982 | 3 | rs9824856   | 113852731 | 1.788E-22 |
| 1965 | 1 | rs4950859   | 202552839 | 3 | rs12632810  | 10824072  | 1.873E-22 |
| 1966 | 1 | rs4950859   | 202552839 | 3 | rs12632152  | 10832600  | 1.886E-22 |
| 1967 | 1 | rs4950859   | 202552839 | 3 | rs2017887   | 10825694  | 1.935E-22 |
| 1968 | 1 | rs747640    | 202551071 | 3 | rs12632810  | 10824072  | 2.5E-22   |
| 1969 | 1 | rs747640    | 202551071 | 3 | rs12632152  | 10832600  | 2.516E-22 |
| 1970 | 1 | rs747640    | 202551071 | 3 | rs2017887   | 10825694  | 2.582E-22 |
| 1971 | 1 | rs6426901   | 165158705 | 1 | rs930734    | 202318316 | 9.938E-22 |

|      |   |             |           |   |             |           |           |
|------|---|-------------|-----------|---|-------------|-----------|-----------|
| 1972 | 1 | rs6426902   | 165158935 | 1 | rs930734    | 202318316 | 9.938E-22 |
| 1973 | 1 | rs6426901   | 165158705 | 1 | rs2361453   | 202336314 | 1.155E-21 |
| 1974 | 1 | rs6426902   | 165158935 | 1 | rs2361453   | 202336314 | 1.155E-21 |
| 1975 | 1 | rs2741849   | 202373394 | 4 | rs283411    | 100265957 | 1.201E-21 |
| 1976 | 1 | rs2741849   | 202373394 | 4 | rs72681904  | 100245080 | 1.288E-21 |
| 1977 | 1 | rs6426901   | 165158705 | 1 | rs2292489   | 202536848 | 2.021E-21 |
| 1978 | 1 | rs6426902   | 165158935 | 1 | rs2292489   | 202536848 | 2.021E-21 |
| 1979 | 1 | rs3767392   | 202547101 | 3 | rs12632152  | 10832600  | 2.478E-21 |
| 1980 | 1 | rs3767392   | 202547101 | 3 | rs12632810  | 10824072  | 2.483E-21 |
| 1981 | 1 | rs3767392   | 202547101 | 3 | rs2017887   | 10825694  | 2.507E-21 |
| 1982 | 1 | rs10753665  | 165154104 | 1 | rs2361453   | 202336314 | 3.584E-21 |
| 1983 | 1 | rs10753665  | 165154104 | 1 | rs930734    | 202318316 | 5.297E-21 |
| 1984 | 1 | rs2741849   | 202373394 | 4 | rs283404    | 100280719 | 1.329E-20 |
| 1985 | 1 | rs79728530  | 174402618 | 1 | rs705742    | 202461982 | 1.964E-20 |
| 1986 | 1 | rs3767409   | 202479192 | 4 | rs113221089 | 3445179   | 3.305E-20 |
| 1987 | 1 | rs60885521  | 174591547 | 1 | rs705742    | 202461982 | 3.843E-20 |
| 1988 | 1 | rs10753665  | 165154104 | 1 | rs2292489   | 202536848 | 7.109E-20 |
| 1989 | 1 | rs79893841  | 174622255 | 1 | rs705742    | 202461982 | 1.263E-19 |
| 1990 | 1 | rs74649124  | 174760589 | 1 | rs705742    | 202461982 | 1.335E-19 |
| 1991 | 1 | rs79258314  | 174760696 | 1 | rs705742    | 202461982 | 1.335E-19 |
| 1992 | 1 | rs78199276  | 174706357 | 1 | rs705742    | 202461982 | 2.287E-18 |
| 1993 | 1 | rs6695956   | 174711947 | 1 | rs705742    | 202461982 | 2.287E-18 |
| 1994 | 1 | rs77727672  | 174718575 | 1 | rs705742    | 202461982 | 2.287E-18 |
| 1995 | 1 | rs79388999  | 174724332 | 1 | rs705742    | 202461982 | 2.287E-18 |
| 1996 | 1 | rs61329817  | 174724485 | 1 | rs705742    | 202461982 | 2.287E-18 |
| 1997 | 1 | rs6703536   | 174613295 | 1 | rs705742    | 202461982 | 3.162E-18 |
| 1998 | 1 | rs12404552  | 202566780 | 3 | rs6803322   | 84986088  | 3.414E-18 |
| 1999 | 1 | rs74761236  | 174619114 | 1 | rs705742    | 202461982 | 4.867E-18 |
| 2000 | 1 | rs149356780 | 174619156 | 1 | rs705742    | 202461982 | 4.867E-18 |
| 2001 | 1 | rs146122202 | 174619399 | 1 | rs705742    | 202461982 | 4.867E-18 |
| 2002 | 1 | rs78172621  | 174624110 | 1 | rs705742    | 202461982 | 4.867E-18 |
| 2003 | 1 | rs74641552  | 174635904 | 1 | rs705742    | 202461982 | 4.867E-18 |
| 2004 | 1 | rs115697417 | 174639688 | 1 | rs705742    | 202461982 | 4.867E-18 |
| 2005 | 1 | rs76311252  | 174640594 | 1 | rs705742    | 202461982 | 4.867E-18 |
| 2006 | 1 | rs77714297  | 174641617 | 1 | rs705742    | 202461982 | 4.867E-18 |
| 2007 | 1 | rs75540548  | 174648680 | 1 | rs705742    | 202461982 | 4.867E-18 |
| 2008 | 1 | rs74225911  | 174519824 | 1 | rs705742    | 202461982 | 1.308E-17 |
| 2009 | 1 | rs16847018  | 174419672 | 1 | rs705742    | 202461982 | 1.868E-17 |
| 2010 | 1 | rs16847025  | 174425858 | 1 | rs705742    | 202461982 | 1.868E-17 |
| 2011 | 1 | rs75368101  | 174447029 | 1 | rs705742    | 202461982 | 1.868E-17 |
| 2012 | 1 | rs74367921  | 174457505 | 1 | rs705742    | 202461982 | 1.868E-17 |
| 2013 | 1 | rs141587031 | 174458302 | 1 | rs705742    | 202461982 | 1.868E-17 |
| 2014 | 1 | rs75222047  | 174460751 | 1 | rs705742    | 202461982 | 1.868E-17 |
| 2015 | 1 | rs77684114  | 174461386 | 1 | rs705742    | 202461982 | 1.868E-17 |
| 2016 | 1 | rs79170014  | 174462952 | 1 | rs705742    | 202461982 | 1.868E-17 |
| 2017 | 1 | rs2901819   | 174467697 | 1 | rs705742    | 202461982 | 1.868E-17 |
| 2018 | 1 | rs58063264  | 174468442 | 1 | rs705742    | 202461982 | 1.868E-17 |
| 2019 | 1 | rs41397546  | 174476714 | 1 | rs705742    | 202461982 | 1.868E-17 |
| 2020 | 1 | rs16847121  | 174482433 | 1 | rs705742    | 202461982 | 1.868E-17 |
| 2021 | 1 | rs76886469  | 174488738 | 1 | rs705742    | 202461982 | 1.868E-17 |
| 2022 | 1 | rs57132183  | 174492721 | 1 | rs705742    | 202461982 | 1.868E-17 |
| 2023 | 1 | rs74651209  | 174501445 | 1 | rs705742    | 202461982 | 1.868E-17 |

|      |   |             |           |   |            |           |           |
|------|---|-------------|-----------|---|------------|-----------|-----------|
| 2024 | 1 | rs59262554  | 174504233 | 1 | rs705742   | 202461982 | 1.868E-17 |
| 2025 | 1 | rs7547843   | 174507529 | 1 | rs705742   | 202461982 | 1.868E-17 |
| 2026 | 1 | rs142531097 | 174512268 | 1 | rs705742   | 202461982 | 1.868E-17 |
| 2027 | 1 | rs146786952 | 174514535 | 1 | rs705742   | 202461982 | 1.868E-17 |
| 2028 | 1 | rs41266052  | 174517443 | 1 | rs705742   | 202461982 | 1.868E-17 |
| 2029 | 1 | rs57898822  | 174531784 | 1 | rs705742   | 202461982 | 1.868E-17 |
| 2030 | 1 | rs75120198  | 174535022 | 1 | rs705742   | 202461982 | 1.868E-17 |
| 2031 | 1 | rs75134210  | 174536483 | 1 | rs705742   | 202461982 | 1.868E-17 |
| 2032 | 1 | rs2179109   | 174540259 | 1 | rs705742   | 202461982 | 1.868E-17 |
| 2033 | 1 | rs16847206  | 174541307 | 1 | rs705742   | 202461982 | 1.868E-17 |
| 2034 | 1 | rs148694367 | 174544318 | 1 | rs705742   | 202461982 | 1.868E-17 |
| 2035 | 1 | rs143179310 | 174545451 | 1 | rs705742   | 202461982 | 1.868E-17 |
| 2036 | 1 | rs79763699  | 174729671 | 1 | rs705742   | 202461982 | 1.877E-17 |
| 2037 | 1 | rs139161617 | 174732199 | 1 | rs705742   | 202461982 | 1.877E-17 |
| 2038 | 1 | rs6673649   | 174733562 | 1 | rs705742   | 202461982 | 1.877E-17 |
| 2039 | 1 | rs75912125  | 174740527 | 1 | rs705742   | 202461982 | 1.877E-17 |
| 2040 | 1 | rs77586561  | 174315488 | 1 | rs17492329 | 202461103 | 3.264E-17 |
| 2041 | 1 | rs6692753   | 174737457 | 1 | rs705742   | 202461982 | 6.343E-17 |
| 2042 | 1 | rs12404552  | 202566780 | 3 | rs6771804  | 84983918  | 6.754E-17 |
| 2043 | 1 | rs114289262 | 174587137 | 1 | rs705742   | 202461982 | 7.496E-17 |
| 2044 | 1 | rs56864802  | 174568929 | 1 | rs705742   | 202461982 | 8.596E-17 |
| 2045 | 1 | rs60240702  | 174569231 | 1 | rs705742   | 202461982 | 8.596E-17 |
| 2046 | 1 | rs77531515  | 174572000 | 1 | rs705742   | 202461982 | 8.596E-17 |
| 2047 | 1 | rs77025642  | 174572929 | 1 | rs705742   | 202461982 | 8.596E-17 |
| 2048 | 1 | rs79989938  | 174575187 | 1 | rs705742   | 202461982 | 8.596E-17 |
| 2049 | 1 | rs80324733  | 174776328 | 1 | rs705742   | 202461982 | 9.138E-17 |
| 2050 | 1 | rs12404552  | 202566780 | 3 | rs28693686 | 84974785  | 9.475E-17 |
| 2051 | 1 | rs3753562   | 174923567 | 1 | rs705742   | 202461982 | 1.192E-16 |
| 2052 | 1 | rs138190123 | 174555301 | 1 | rs705742   | 202461982 | 1.637E-16 |
| 2053 | 1 | rs78583223  | 174766014 | 1 | rs17492329 | 202461103 | 3.485E-16 |
| 2054 | 1 | rs58762254  | 174780210 | 1 | rs705742   | 202461982 | 4.83E-16  |
| 2055 | 1 | rs61028529  | 174787899 | 1 | rs705742   | 202461982 | 4.83E-16  |
| 2056 | 1 | rs79203634  | 174793526 | 1 | rs705742   | 202461982 | 4.83E-16  |
| 2057 | 1 | rs74524401  | 174795281 | 1 | rs705742   | 202461982 | 4.83E-16  |
| 2058 | 1 | rs59190079  | 174594608 | 1 | rs705742   | 202461982 | 5.032E-16 |
| 2059 | 1 | rs187157646 | 174643586 | 1 | rs705742   | 202461982 | 7.667E-16 |
| 2060 | 1 | rs76912418  | 174273097 | 1 | rs17492329 | 202461103 | 8.277E-16 |
| 2061 | 1 | rs78583223  | 174766014 | 1 | rs705742   | 202461982 | 1.027E-15 |
| 2062 | 1 | rs57425860  | 174335876 | 1 | rs17492329 | 202461103 | 1.095E-15 |
| 2063 | 1 | rs80134637  | 174749551 | 1 | rs705742   | 202461982 | 1.467E-15 |
| 2064 | 1 | rs76358862  | 174297060 | 1 | rs17492329 | 202461103 | 1.678E-15 |
| 2065 | 1 | rs59436654  | 174746513 | 1 | rs705742   | 202461982 | 1.723E-15 |
| 2066 | 1 | rs74225904  | 174260843 | 1 | rs17492329 | 202461103 | 1.844E-15 |
| 2067 | 1 | rs77915633  | 174268968 | 1 | rs17492329 | 202461103 | 1.844E-15 |
| 2068 | 1 | rs75109372  | 174275765 | 1 | rs17492329 | 202461103 | 1.844E-15 |
| 2069 | 1 | rs58657641  | 174290586 | 1 | rs17492329 | 202461103 | 1.844E-15 |
| 2070 | 1 | rs79842710  | 174296950 | 1 | rs17492329 | 202461103 | 1.844E-15 |
| 2071 | 1 | rs59949376  | 174298821 | 1 | rs17492329 | 202461103 | 1.844E-15 |
| 2072 | 1 | rs79273006  | 174306403 | 1 | rs17492329 | 202461103 | 1.844E-15 |
| 2073 | 1 | rs7549724   | 174311135 | 1 | rs17492329 | 202461103 | 1.844E-15 |
| 2074 | 1 | rs74982851  | 174322037 | 1 | rs17492329 | 202461103 | 1.844E-15 |
| 2075 | 1 | rs74838601  | 174330367 | 1 | rs17492329 | 202461103 | 1.844E-15 |

|      |   |             |           |   |            |           |           |
|------|---|-------------|-----------|---|------------|-----------|-----------|
| 2076 | 1 | rs78735014  | 174337971 | 1 | rs17492329 | 202461103 | 1.844E-15 |
| 2077 | 1 | rs58525721  | 174344965 | 1 | rs17492329 | 202461103 | 1.844E-15 |
| 2078 | 1 | rs80232010  | 174346619 | 1 | rs17492329 | 202461103 | 1.844E-15 |
| 2079 | 1 | rs75694709  | 174352895 | 1 | rs17492329 | 202461103 | 1.844E-15 |
| 2080 | 1 | rs75455128  | 174354080 | 1 | rs17492329 | 202461103 | 1.844E-15 |
| 2081 | 1 | rs78840512  | 174367013 | 1 | rs17492329 | 202461103 | 1.844E-15 |
| 2082 | 1 | rs78176042  | 174367254 | 1 | rs17492329 | 202461103 | 1.844E-15 |
| 2083 | 1 | rs79039367  | 174376971 | 1 | rs17492329 | 202461103 | 1.844E-15 |
| 2084 | 1 | rs57053120  | 174830490 | 1 | rs705742   | 202461982 | 2.528E-15 |
| 2085 | 1 | rs76828045  | 174847442 | 1 | rs705742   | 202461982 | 2.934E-15 |
| 2086 | 1 | rs147728966 | 174848270 | 1 | rs705742   | 202461982 | 2.934E-15 |
| 2087 | 1 | rs76991270  | 174267626 | 1 | rs17492329 | 202461103 | 3.009E-15 |
| 2088 | 1 | rs80143117  | 174256505 | 1 | rs17492329 | 202461103 | 3.275E-15 |
| 2089 | 1 | rs59061054  | 174244009 | 1 | rs17492329 | 202461103 | 3.452E-15 |
| 2090 | 1 | rs80196237  | 174049290 | 1 | rs17492329 | 202461103 | 6.268E-15 |
| 2091 | 1 | rs141729655 | 174432399 | 1 | rs705742   | 202461982 | 1.126E-14 |
| 2092 | 1 | rs79077452  | 174435344 | 1 | rs705742   | 202461982 | 1.126E-14 |
| 2093 | 1 | rs79728530  | 174402618 | 1 | rs17492329 | 202461103 | 1.185E-14 |
| 2094 | 1 | rs60723087  | 174655617 | 1 | rs17492329 | 202461103 | 1.186E-14 |
| 2095 | 1 | rs75062924  | 174664341 | 1 | rs17492329 | 202461103 | 1.186E-14 |
| 2096 | 1 | rs74739388  | 174666752 | 1 | rs17492329 | 202461103 | 1.186E-14 |
| 2097 | 1 | rs74225917  | 174686241 | 1 | rs17492329 | 202461103 | 1.186E-14 |
| 2098 | 1 | rs59354288  | 174687003 | 1 | rs17492329 | 202461103 | 1.186E-14 |
| 2099 | 1 | rs60665754  | 174687287 | 1 | rs17492329 | 202461103 | 1.186E-14 |
| 2100 | 1 | rs76014701  | 174690404 | 1 | rs17492329 | 202461103 | 1.186E-14 |
| 2101 | 1 | rs74365829  | 174690558 | 1 | rs17492329 | 202461103 | 1.186E-14 |
| 2102 | 1 | rs7516351   | 174062741 | 1 | rs17492329 | 202461103 | 1.342E-14 |
| 2103 | 1 | rs59259904  | 174071417 | 1 | rs17492329 | 202461103 | 1.342E-14 |
| 2104 | 1 | rs58911640  | 174078545 | 1 | rs17492329 | 202461103 | 1.342E-14 |
| 2105 | 1 | rs80065868  | 174084151 | 1 | rs17492329 | 202461103 | 1.342E-14 |
| 2106 | 1 | rs74634566  | 174084903 | 1 | rs17492329 | 202461103 | 1.342E-14 |
| 2107 | 1 | rs4515855   | 174588920 | 1 | rs705742   | 202461982 | 1.702E-14 |
| 2108 | 1 | rs7543502   | 174653701 | 1 | rs17492329 | 202461103 | 2.163E-14 |
| 2109 | 1 | rs4284300   | 174463049 | 1 | rs12404552 | 202566780 | 2.601E-14 |
| 2110 | 1 | rs79387712  | 174605087 | 1 | rs705742   | 202461982 | 2.603E-14 |
| 2111 | 1 | rs79763699  | 174729671 | 1 | rs17492329 | 202461103 | 2.65E-14  |
| 2112 | 1 | rs139161617 | 174732199 | 1 | rs17492329 | 202461103 | 2.65E-14  |
| 2113 | 1 | rs6673649   | 174733562 | 1 | rs17492329 | 202461103 | 2.65E-14  |
| 2114 | 1 | rs75912125  | 174740527 | 1 | rs17492329 | 202461103 | 2.65E-14  |
| 2115 | 1 | rs78199276  | 174706357 | 1 | rs17492329 | 202461103 | 2.733E-14 |
| 2116 | 1 | rs6695956   | 174711947 | 1 | rs17492329 | 202461103 | 2.733E-14 |
| 2117 | 1 | rs77727672  | 174718575 | 1 | rs17492329 | 202461103 | 2.733E-14 |
| 2118 | 1 | rs79388999  | 174724332 | 1 | rs17492329 | 202461103 | 2.733E-14 |
| 2119 | 1 | rs61329817  | 174724485 | 1 | rs17492329 | 202461103 | 2.733E-14 |
